# Supplementary material
Source: publisher figshare collection journal article supplement (https://gsapubs.figshare.com/articles/dataset/_/21396987)
Supplement: Supplementary file 1 [file 1]

## Sheet: Sheet1
Supplementary Data File 2. LA-ICP-MS analytical results of zircon U-Pb isotopic ratios and ages of Xishuigou Red Clay samples
Analysis ID	Isotope ratios								Ages (Ma)								Preferred age	±	Th	U
	207Pb/	1 σ	207Pb/	1 σ	206Pb/	1 σ	208Pb/	1 σ	207Pb/	1 σ	207Pb/	1 σ	206Pb/	1 σ	208Pb/	1 σ
	206Pb		235U		238U		232Th		206Pb		235U		238U		232Th		(Ma)	(Ma)	(ppm)	(ppm)
XSG_40.3 Ma
X1002	0.05995	0.0013	0.58637	0.01227	0.07092	0.00074	0.02527	0.00034	601.6	46.23	468.5	7.85	441.7	4.43	504.5	6.62	441.7	4.43	264.98	404.25
X1003	0.1133	0.0021	5.18239	0.09195	0.33165	0.00361	0.10905	0.00144	1853	33.14	1849.7	15.1	1846.4	17.46	2092.1	26.26	1853	33.14	89.43	95.53
X1004	0.05566	0.00161	0.54317	0.01524	0.07075	0.0008	0.02535	0.00041	438.7	62.85	440.5	10.03	440.7	4.79	505.9	8.18	440.7	4.79	208.04	339.29
X1005	0.05244	0.00377	0.30162	0.02122	0.0417	0.00075	0.01669	0.00057	304.7	155.41	267.7	16.55	263.4	4.64	334.7	11.25	263.4	4.64	47.82	77.47
X1006	0.05779	0.00151	0.56739	0.01435	0.07118	0.00078	0.02498	0.0004	521.8	56.44	456.3	9.29	443.2	4.69	498.7	7.86	443.2	4.69	236.55	427.55
X1007	0.05117	0.00238	0.28798	0.01308	0.0408	0.00055	0.01397	0.00029	248.3	103.66	257	10.31	257.8	3.43	280.5	5.86	257.8	3.43	158.78	196.93
X1008	0.05686	0.00146	0.57165	0.01427	0.07289	0.00079	0.02526	0.00118	485.3	55.82	459.1	9.22	453.6	4.77	504.2	23.24	453.6	4.77	19.84	406.96
X1009	0.05358	0.00226	0.46292	0.019	0.06263	0.00083	0.01907	0.00051	353.5	92.2	386.3	13.19	391.6	5.02	381.9	10.17	391.6	5.02	87.41	190.96
X1010	0.05806	0.0017	0.58769	0.01671	0.07338	0.00084	0.02381	0.00046	531.6	63	469.4	10.68	456.5	5.02	475.5	9.07	456.5	5.02	101.75	226.93
X1011	0.05768	0.00118	0.68417	0.01352	0.08599	0.00088	0.03175	0.00065	517.4	44.57	529.3	8.15	531.8	5.25	631.7	12.76	531.8	5.25	96.43	669.53
X1012	0.05663	0.00144	0.56884	0.014	0.07282	0.00079	0.02479	0.00045	476.5	55.42	457.3	9.06	453.1	4.75	495	8.82	453.1	4.75	130.11	356.53
X1013	0.05724	0.00138	0.64651	0.01514	0.08187	0.00088	0.02668	0.00037	500.4	52.82	506.3	9.33	507.3	5.24	532.2	7.24	507.3	5.24	255.93	336.9
X1014	0.06979	0.00216	1.34653	0.04046	0.13985	0.00172	0.04723	0.00092	922.3	62.46	866.1	17.51	843.8	9.71	932.8	17.68	843.8	9.71	148.06	247.83
X1015	0.05637	0.00102	0.53906	0.0094	0.06932	0.0007	0.02333	0.00027	466.3	39.86	437.8	6.2	432	4.2	466.1	5.4	432	4.2	691.6	1039.91
X1016	0.05062	0.004	0.23915	0.01849	0.03424	0.00066	0.01343	0.00056	223.7	173.32	217.7	15.15	217	4.14	269.6	11.13	217	4.14	60.87	132.85
X1017	0.07024	0.00129	1.49616	0.0265	0.15441	0.00159	0.05012	0.00086	935.3	37.26	928.8	10.78	925.6	8.88	988.4	16.53	925.6	8.88	75.25	313.06
X1018	0.05744	0.00266	0.65197	0.02942	0.08227	0.00117	0.0318	0.00081	508.1	99.1	509.7	18.08	509.7	6.97	632.7	15.95	509.7	6.97	50.84	101.74
X1019	0.05616	0.00167	0.57227	0.01654	0.07386	0.00085	0.02407	0.00045	458.4	64.72	459.5	10.68	459.4	5.08	480.8	8.82	459.4	5.08	128.68	266.66
X1020	0.09114	0.004	3.14338	0.13361	0.24999	0.00416	0.07235	0.00179	1449.5	81.45	1443.4	32.74	1438.4	21.44	1411.9	33.72	1449.5	81.45	35.48	33.29
X1021	0.05742	0.00254	0.55283	0.02377	0.06979	0.00097	0.0238	0.00063	507.3	94.71	446.8	15.54	434.9	5.86	475.5	12.35	434.9	5.86	145.3	293.53
X1022	0.05468	0.00168	0.56023	0.01673	0.07426	0.00086	0.02585	0.00051	400.1	65.76	451.7	10.89	461.8	5.16	515.9	9.96	461.8	5.16	83.1	193.6
X1023	0.0558	0.00132	0.57621	0.01322	0.07486	0.0008	0.02555	0.00042	444	51.48	462	8.51	465.3	4.81	510	8.19	465.3	4.81	169.31	408.19
X1024	0.05491	0.00182	0.55084	0.01781	0.07271	0.00087	0.02494	0.00059	408.6	71.95	445.5	11.66	452.5	5.23	498	11.7	452.5	5.23	69.53	209.87
X1025	0.05522	0.00165	0.53101	0.01539	0.0697	0.0008	0.02268	0.00032	421.1	64.71	432.5	10.21	434.4	4.85	453.3	6.26	434.4	4.85	293.99	263.82
X1026	0.05339	0.0032	0.29865	0.01747	0.04055	0.00066	0.01381	0.00036	345.2	129.58	265.3	13.66	256.2	4.11	277.2	7.27	256.2	4.11	136	164.14
X1027	0.05915	0.00128	0.68621	0.01433	0.0841	0.00089	0.0261	0.00039	572.6	46.22	530.5	8.63	520.5	5.28	520.8	7.73	520.5	5.28	320.47	708.31
X1028	0.05824	0.00187	0.69238	0.02157	0.08618	0.00104	0.0273	0.00055	538.2	69.19	534.2	12.94	532.9	6.14	544.5	10.73	532.9	6.14	97.46	192.92
X1029	0.08109	0.00133	2.36815	0.03748	0.21171	0.00217	0.06256	0.00076	1223.5	31.96	1233	11.3	1237.9	11.56	1226.5	14.37	1223.5	31.96	152.46	225.02
X1030	0.10305	0.0022	4.22365	0.0869	0.2971	0.00343	0.08643	0.00143	1679.8	38.92	1678.6	16.89	1676.9	17.04	1675.5	26.6	1679.8	38.92	38.9	61.09
X1031	0.05731	0.00295	0.62041	0.03109	0.07848	0.0012	0.02575	0.0008	502.8	109.81	490.1	19.48	487.1	7.2	513.9	15.8	487.1	7.2	51.43	108.4
X1032	0.05133	0.0027	0.38449	0.01978	0.05431	0.0008	0.01698	0.00048	255.5	116.56	330.3	14.51	340.9	4.91	340.2	9.53	340.9	4.91	54.46	101.14
X1033	0.05609	0.0012	0.60866	0.01265	0.07867	0.00083	0.02414	0.0003	455.4	46.71	482.7	7.99	488.2	4.95	482.2	5.86	488.2	4.95	390.85	457.87
X1035	0.08737	0.00147	2.89477	0.04682	0.24021	0.00251	0.06932	0.00089	1368.7	31.85	1380.5	12.21	1387.8	13.03	1354.6	16.81	1368.7	31.85	137.15	222.37
X1036	0.05566	0.00139	0.52978	0.01286	0.06901	0.00076	0.02098	0.00038	438.5	54.35	431.7	8.53	430.2	4.56	419.7	7.52	430.2	4.56	131.38	352.23
X1037	0.1034	0.00167	4.29745	0.06675	0.30133	0.00318	0.08939	0.00115	1686	29.48	1692.9	12.79	1697.9	15.73	1730.5	21.3	1686	29.48	130.57	209.9
X1038	0.05236	0.00197	0.28737	0.01053	0.03979	0.0005	0.01322	0.00024	301.1	83.44	256.5	8.31	251.6	3.11	265.4	4.76	251.6	3.11	250.22	312.4
X1039	0.05552	0.00141	0.60966	0.01507	0.07963	0.00088	0.02563	0.0004	432.8	55.26	483.3	9.5	493.9	5.25	511.5	7.95	493.9	5.25	156.21	305
X1040	0.06825	0.00138	1.49608	0.02932	0.15895	0.0017	0.04765	0.00063	876.1	41.31	928.8	11.93	950.9	9.46	940.8	12.2	950.9	9.46	129.14	190.93
X1041	0.05515	0.00352	0.29482	0.01836	0.03877	0.00068	0.01202	0.00026	418	136.85	262.3	14.4	245.2	4.2	241.6	5.25	245.2	4.2	170.78	103.54
X1042	0.05454	0.00113	0.5358	0.01077	0.07123	0.00075	0.02123	0.00028	393.5	45.46	435.7	7.12	443.6	4.49	424.7	5.48	443.6	4.49	371.37	613.77
X1043	0.05892	0.00159	0.61518	0.01615	0.07571	0.00086	0.02484	0.00039	564.3	57.74	486.8	10.15	470.5	5.16	496	7.75	470.5	5.16	172.7	278.03
X1044	0.05154	0.00149	0.30481	0.00859	0.04289	0.00049	0.0129	0.00022	264.9	65	270.2	6.69	270.7	3.01	259	4.31	270.7	3.01	241.93	435.26
X1045	0.05289	0.00129	0.5399	0.0128	0.07402	0.00081	0.02152	0.00033	324.2	54.25	438.4	8.44	460.4	4.84	430.3	6.49	460.4	4.84	195.22	368.34
X1046	0.18195	0.00359	12.9875	0.24697	0.51765	0.00659	0.14437	0.00342	2670.8	32.34	2678.7	17.93	2689.2	28.01	2725.7	60.45	2670.8	32.34	14.31	38.49
X1047	0.05084	0.00521	0.27412	0.02758	0.03911	0.00087	0.01243	0.00036	233.4	220.41	246	21.98	247.3	5.41	249.6	7.21	247.3	5.41	68.1	45
X1048	0.07401	0.00143	1.81773	0.034	0.17812	0.00191	0.05723	0.00104	1041.8	38.49	1051.9	12.25	1056.7	10.46	1125	19.87	1041.8	38.49	82.47	346.9
X1049	0.07035	0.00177	1.59854	0.03894	0.16482	0.00191	0.04978	0.00088	938.6	50.62	969.6	15.22	983.5	10.57	981.9	16.99	983.5	10.57	96.17	196.36
X1050	0.09967	0.00117	3.99248	0.04507	0.29056	0.00287	0.08026	0.0014	1618	21.63	1632.7	9.17	1644.3	14.34	1560.5	26.2	1618	21.63	43.39	716.3
X1051	0.06027	0.00102	0.67274	0.01105	0.08098	0.00083	0.02629	0.00032	613.1	36.17	522.4	6.71	502	4.94	524.5	6.37	502	4.94	348.71	818.08
X1053	0.05686	0.00114	0.63853	0.01242	0.08147	0.00086	0.02485	0.00034	485.5	43.85	501.4	7.7	504.9	5.12	496.2	6.72	504.9	5.12	222.22	483.13
X1054	0.08807	0.00299	2.93903	0.09647	0.24212	0.00344	0.06865	0.00157	1384	63.65	1392	24.87	1397.7	17.85	1342.1	29.73	1384	63.65	45.95	67.39
X1055	0.06836	0.00129	1.48135	0.02721	0.15723	0.00167	0.0469	0.00072	879.5	38.67	922.8	11.13	941.4	9.32	926.4	13.81	941.4	9.32	92.26	260.83
X1056	0.05403	0.00117	0.49171	0.01038	0.06603	0.00071	0.02169	0.00052	372.1	48.06	406.1	7.06	412.2	4.27	433.7	10.2	412.2	4.27	66.29	532.46
X1057	0.08046	0.00164	2.27001	0.04482	0.20473	0.00227	0.07192	0.00146	1208.2	39.61	1203	13.92	1200.7	12.16	1403.8	27.49	1208.2	39.61	44.91	216.94
X1058	0.05543	0.00166	0.59746	0.01741	0.07822	0.00093	0.03525	0.00202	429.4	65.02	475.6	11.07	485.5	5.53	700.2	39.48	485.5	5.53	15.61	475
X1059	0.05541	0.00293	0.6643	0.0343	0.087	0.00137	0.02522	0.00071	428.6	114.13	517.2	20.93	537.8	8.14	503.4	14.06	537.8	8.14	60.87	94.52
X1060	0.05349	0.00139	0.53894	0.01365	0.07312	0.00082	0.03626	0.00074	349.5	57.76	437.7	9.01	454.9	4.94	719.9	14.37	454.9	4.94	103.44	604.24
X1061	0.05646	0.00179	0.59623	0.01841	0.07665	0.00093	0.02263	0.00032	469.8	68.76	474.8	11.71	476.1	5.56	452.3	6.25	476.1	5.56	231.96	183.48
X1062	0.05517	0.00103	0.60534	0.01102	0.07965	0.00083	0.02299	0.00025	418.9	40.6	480.6	6.97	494	4.97	459.4	4.87	494	4.97	590.41	561.18
X1063	0.05316	0.00837	0.3974	0.06135	0.05427	0.00183	0.01833	0.00112	335.5	322.13	339.8	44.58	340.7	11.19	367.2	22.14	340.7	11.19	19.42	23.18
X1064	0.05224	0.00124	0.50511	0.01167	0.07019	0.00077	0.02076	0.0003	296.1	53.12	415.2	7.88	437.3	4.63	415.3	5.92	437.3	4.63	258.14	465.59
X1065	0.06611	0.00119	1.28828	0.02256	0.14147	0.00149	0.04478	0.00062	810	37.23	840.5	10.01	853	8.44	885.5	12.07	853	8.44	143.44	393.44
X1066	0.06911	0.00448	1.55361	0.09793	0.16322	0.00329	0.05311	0.0016	902.1	128.19	951.9	38.94	974.6	18.23	1045.9	30.72	974.6	18.23	29.7	31.66
X1067	0.05281	0.00238	0.42991	0.0189	0.05911	0.00083	0.01519	0.00038	320.7	99.11	363.1	13.42	370.2	5.08	304.7	7.56	370.2	5.08	88.91	141.86
X1068	0.05379	0.00176	0.53281	0.01705	0.07193	0.00088	0.02124	0.00045	362.2	72.17	433.7	11.29	447.8	5.3	424.8	8.97	447.8	5.3	102.38	237.08
X1069	0.05266	0.00337	0.43654	0.02729	0.0602	0.00104	0.01904	0.00053	314.3	139.05	367.8	19.29	376.8	6.34	381.3	10.61	376.8	6.34	55.76	69.31
X1070	0.09444	0.00233	3.56032	0.08499	0.2738	0.0034	0.07931	0.0014	1516.9	45.8	1540.7	18.92	1560.1	17.22	1542.6	26.18	1516.9	45.8	92.99	143.47
X1071	0.07125	0.00167	1.57934	0.03604	0.16099	0.00185	0.05139	0.00064	964.7	47.23	962.1	14.19	962.3	10.28	1013	12.32	962.3	10.28	198.23	177.31
X1072	0.05167	0.00106	0.48431	0.00971	0.06808	0.00073	0.01987	0.00025	270.8	46.4	401	6.64	424.6	4.38	397.8	4.92	424.6	4.38	435.72	704.98
X1073	0.05102	0.00161	0.40953	0.01256	0.05825	0.00068	0.01666	0.00031	241.7	71.11	348.5	9.05	365	4.14	334	6.13	365	4.14	189.79	376.75
X1074	0.05365	0.00176	0.56355	0.018	0.07623	0.00091	0.01999	0.00058	356.1	72.38	453.8	11.69	473.6	5.48	400.2	11.55	473.6	5.48	41.54	184.65
X1075	0.11122	0.00227	5.01755	0.09805	0.32736	0.00378	0.09026	0.0012	1819.5	36.54	1822.3	16.54	1825.6	18.35	1746.6	22.3	1819.5	36.54	98.12	96.74
X1076	0.05176	0.00128	0.50052	0.01199	0.07016	0.00075	0.02016	0.00035	275	55.54	412.1	8.11	437.1	4.54	403.5	6.91	437.1	4.54	101.5	299.3
X1077	0.09248	0.00256	3.4085	0.09102	0.26746	0.00343	0.06892	0.00144	1477.1	51.75	1506.4	20.97	1527.9	17.43	1347.2	27.15	1477.1	51.75	55.24	93.43
X1078	0.0503	0.00349	0.27587	0.01872	0.0398	0.0007	0.01148	0.00034	209	153.4	247.4	14.9	251.6	4.36	230.7	6.76	251.6	4.36	57.15	69.77
X1079	0.05255	0.00164	0.50117	0.0152	0.0692	0.00081	0.02066	0.00042	309.4	69.38	412.5	10.28	431.3	4.87	413.3	8.39	431.3	4.87	79.12	205.73
X1080	0.08716	0.00195	2.88028	0.06214	0.2398	0.00274	0.06453	0.00087	1364	42.52	1376.8	16.26	1385.6	14.24	1264	16.56	1364	42.52	149.96	151.08
X1081	0.05735	0.00189	0.38455	0.01227	0.04866	0.00059	0.09884	0.00409	504.5	71.27	330.4	9	306.3	3.62	1905.2	75.15	306.3	3.62	22.09	1329.15
X1082	0.05312	0.00114	0.51247	0.01065	0.07	0.00073	0.02098	0.00025	333.9	47.89	420.1	7.15	436.2	4.39	419.7	4.97	436.2	4.39	434.6	608.68
X1083	0.04876	0.00297	0.22984	0.01367	0.0342	0.00056	0.0102	0.00028	136.3	137.22	210.1	11.29	216.8	3.47	205	5.61	216.8	3.47	98.02	128.1
X1084	0.06917	0.00162	1.42546	0.03222	0.14954	0.00166	0.04545	0.00074	903.7	47.54	899.7	13.49	898.4	9.3	898.3	14.29	898.4	9.3	81.22	172.16
X1085	0.05431	0.00129	0.49158	0.01132	0.06567	0.0007	0.02086	0.0003	383.9	52.36	406	7.7	410	4.24	417.2	6.03	410	4.24	182.53	384.78
X1086	0.0509	0.00232	0.39787	0.01769	0.05672	0.00078	0.01641	0.00043	236.2	101.88	340.1	12.85	355.6	4.76	329	8.47	355.6	4.76	63.93	124.5
X1087	0.07555	0.00159	1.90003	0.03841	0.18247	0.00198	0.05187	0.00078	1083.2	41.53	1081.1	13.45	1080.5	10.78	1022.2	14.93	1083.2	41.53	80.79	155.71
X1088	0.05416	0.00162	0.51409	0.01497	0.06887	0.00079	0.02077	0.00039	377.7	65.9	421.2	10.04	429.3	4.78	415.6	7.75	429.3	4.78	84.51	189.15
X1089	0.05653	0.00199	0.55811	0.01907	0.07163	0.00089	0.02313	0.00047	472.7	76.72	450.3	12.42	446	5.37	462.2	9.3	446	5.37	105.77	204.59
X1090	0.05659	0.00203	0.60076	0.02094	0.07703	0.00097	0.02342	0.00053	474.8	78.18	477.7	13.29	478.4	5.8	468	10.48	478.4	5.8	130.03	292.37
X1091	0.05424	0.00096	0.57985	0.00988	0.07756	0.00078	0.02233	0.00025	381	39.27	464.4	6.35	481.5	4.64	446.4	4.86	481.5	4.64	440.42	692.8
X1092	0.06643	0.00107	1.36637	0.02111	0.14923	0.00149	0.04182	0.00041	820	33.3	874.6	9.06	896.7	8.35	828	8.02	896.7	8.35	408.19	399.35
X1093	0.05444	0.00123	0.52855	0.01152	0.07045	0.00074	0.02197	0.00046	389.1	49.52	430.8	7.65	438.8	4.46	439.3	9.06	438.8	4.46	69.85	400.93
X1094	0.08661	0.00187	2.82183	0.05878	0.23637	0.00267	0.07309	0.00131	1351.9	41.17	1361.4	15.62	1367.8	13.92	1425.7	24.63	1351.9	41.17	43.17	105.9
X1095	0.07459	0.00268	1.83799	0.06393	0.17878	0.00244	0.04946	0.001	1057.2	70.95	1059.1	22.87	1060.3	13.36	975.8	19.29	1060.3	13.36	44.83	51.57
X1096	0.05393	0.00124	0.5492	0.01222	0.07388	0.00078	0.0223	0.00029	368.1	50.94	444.5	8.01	459.5	4.69	445.8	5.7	459.5	4.69	267.35	399.34
X1097	0.05005	0.00244	0.2843	0.01351	0.04121	0.00058	0.01179	0.00033	197.4	109.42	254.1	10.68	260.3	3.6	237	6.58	260.3	3.6	63.9	127.99
X1098	0.08615	0.00216	2.76564	0.06676	0.23292	0.00276	0.06858	0.00144	1341.4	47.65	1346.3	18	1349.8	14.45	1340.6	27.25	1341.4	47.65	32.01	83.73
X1099	0.06044	0.00147	0.5952	0.01403	0.07144	0.00078	0.02373	0.00035	619.5	51.74	474.2	8.93	444.8	4.66	474	6.97	444.8	4.66	127.36	249.05
X1100	0.11271	0.0025	5.18784	0.11027	0.33394	0.00398	0.10033	0.00171	1843.5	39.54	1850.6	18.1	1857.4	19.25	1932.5	31.48	1843.5	39.54	27.48	43.8
X1101	0.0556	0.00111	0.59251	0.01144	0.07731	0.00079	0.03643	0.00132	436.1	43.52	472.5	7.29	480.1	4.74	723.2	25.66	480.1	4.74	20.5	765.44
X1102	0.04953	0.00283	0.26354	0.01474	0.0386	0.00059	0.01272	0.00056	173.1	128.33	237.5	11.84	244.2	3.67	255.5	11.2	244.2	3.67	22.57	106.24
X1103	0.05663	0.00095	0.56794	0.00916	0.07276	0.00072	0.02202	0.00022	476.4	37.08	456.7	5.93	452.7	4.33	440.2	4.34	452.7	4.33	889.01	968.72
X1104	0.22719	0.00278	18.8448	0.21813	0.60176	0.00613	0.15117	0.0018	3032.4	19.49	3033.9	11.16	3036.9	24.66	2845.4	31.64	3032.4	19.49	49.95	88.03
X1105	0.0531	0.00233	0.37076	0.01585	0.05066	0.00068	0.01606	0.00029	332.9	96.25	320.2	11.74	318.6	4.17	322.1	5.75	318.6	4.17	130.6	129.12
X1106	0.05483	0.00131	0.5732	0.01324	0.07584	0.00081	0.02343	0.00034	405.2	52.16	460.1	8.54	471.3	4.85	468.2	6.71	471.3	4.85	163.4	306.79
X1107	0.05347	0.00117	0.48291	0.01021	0.06552	0.00068	0.02083	0.00035	348.8	48.75	400.1	6.99	409.1	4.12	416.7	7.02	409.1	4.12	128.07	486.69
X1108	0.05444	0.00145	0.51268	0.01321	0.06832	0.00075	0.02164	0.00032	389.1	58.25	420.2	8.87	426	4.53	432.7	6.33	426	4.53	161.64	259.21
X1109	0.05476	0.00137	0.57024	0.0138	0.07554	0.00082	0.02274	0.00034	402.6	54.62	458.2	8.93	469.4	4.89	454.6	6.75	469.4	4.89	159.85	289.84
X1110	0.05038	0.00264	0.28899	0.01476	0.04162	0.00062	0.01282	0.00037	212.4	116.98	257.8	11.63	262.8	3.82	257.4	7.31	262.8	3.82	62.18	109.09
X1111	0.05711	0.00121	0.5763	0.01178	0.0732	0.00076	0.02395	0.0003	495.4	45.84	462.1	7.59	455.4	4.56	478.4	5.83	455.4	4.56	380.54	578.51
X1112	0.0533	0.00313	0.46486	0.02669	0.06327	0.001	0.01916	0.00037	341.6	127.11	387.6	18.5	395.5	6.09	383.5	7.32	395.5	6.09	96.06	59.8
X1113	0.05597	0.00118	0.58125	0.01189	0.07534	0.00078	0.02377	0.00031	450.6	46.11	465.3	7.63	468.3	4.68	474.9	6.13	468.3	4.68	215.71	391.14
X1114	0.04968	0.00169	0.27586	0.00915	0.04028	0.00047	0.01221	0.00023	180.3	77.47	247.4	7.28	254.6	2.94	245.4	4.6	254.6	2.94	169.98	310.23
X1115	0.0519	0.0015	0.33414	0.0094	0.0467	0.00052	0.01469	0.00023	281.1	64.9	292.7	7.16	294.2	3.22	294.7	4.54	294.2	3.22	213.54	334.65
X1116	0.04902	0.00322	0.25437	0.01636	0.03765	0.00062	0.01167	0.00036	148.6	147.22	230.1	13.24	238.2	3.86	234.5	7.28	238.2	3.86	61.77	93.17
X1117	0.05584	0.00101	0.58502	0.01023	0.076	0.00076	0.02321	0.00026	445.6	39.52	467.7	6.55	472.2	4.56	463.8	5.09	472.2	4.56	452.55	646.95
X1118	0.05604	0.00103	0.61324	0.01083	0.07938	0.0008	0.0248	0.00031	453.7	39.96	485.6	6.82	492.4	4.76	495.2	6.17	492.4	4.76	240.88	558.24
X1119	0.10896	0.00171	4.81087	0.07184	0.32029	0.0033	0.09384	0.00131	1782	28.32	1786.8	12.55	1791.1	16.13	1812.9	24.29	1782	28.32	77.63	191.05
X1120	0.05227	0.00296	0.29546	0.01634	0.041	0.00064	0.01355	0.00038	297.4	124.26	262.8	12.81	259	3.96	272.1	7.62	259	3.96	55.35	92.58
X1121	0.05723	0.00149	0.61628	0.01554	0.07812	0.00086	0.02372	0.0004	499.8	56.82	487.5	9.77	484.9	5.13	473.9	7.96	484.9	5.13	104.17	228.85
X1122	0.05593	0.00114	0.60634	0.01189	0.07864	0.00081	0.02353	0.00029	449.3	44.24	481.3	7.52	488	4.81	470.2	5.8	488	4.81	271.64	434.51
X1123	0.05377	0.00455	0.43295	0.03595	0.0584	0.00115	0.01803	0.00064	361.4	179.94	365.3	25.47	365.9	6.99	361.2	12.64	365.9	6.99	39.06	51.49
X1124	0.05508	0.0014	0.5386	0.01329	0.07093	0.00077	0.02304	0.00035	415.3	55.24	437.5	8.77	441.8	4.62	460.5	6.92	441.8	4.62	140.32	265.57
X1125	0.05653	0.00128	0.60926	0.01331	0.07818	0.00082	0.02527	0.00034	472.4	49.73	483.1	8.4	485.3	4.91	504.4	6.62	485.3	4.91	190.97	307.8
X1126	0.0689	0.00163	1.42614	0.03266	0.15014	0.00165	0.04526	0.00072	895.7	48.17	899.9	13.67	901.8	9.26	894.7	13.96	901.8	9.26	67.15	121.79
X1127	0.05532	0.00108	0.57463	0.01086	0.07535	0.00076	0.02334	0.00028	425.1	42.32	461	7.01	468.3	4.58	466.3	5.62	468.3	4.58	292.42	473.24
X1128	0.0494	0.00172	0.26936	0.00912	0.03956	0.00047	0.01276	0.00021	166.6	79.27	242.2	7.3	250.1	2.9	256.3	4.17	250.1	2.9	197.11	251.19
X1129	0.05615	0.00154	0.54162	0.01439	0.06996	0.00078	0.02334	0.00038	458	59.72	439.5	9.48	435.9	4.68	466.3	7.58	435.9	4.68	118.59	230.1
X1130	0.05599	0.00135	0.5587	0.01304	0.07238	0.00077	0.02115	0.0003	451.5	52.52	450.7	8.49	450.5	4.64	423	5.84	450.5	4.64	205.37	299.64
X1132	0.05145	0.00255	0.30846	0.01492	0.04349	0.00061	0.01337	0.00033	260.9	109.81	273	11.58	274.4	3.78	268.5	6.6	274.4	3.78	79.45	122.72
X1133	0.05466	0.00089	0.48849	0.00766	0.06482	0.00064	0.01984	0.00038	398.2	35.93	403.9	5.23	404.9	3.84	397.1	7.48	404.9	3.84	100.55	1011.2
X1134	0.06854	0.00126	1.47637	0.02609	0.15624	0.0016	0.04877	0.00073	884.9	37.55	920.7	10.7	935.8	8.9	962.5	13.99	935.8	8.9	75.71	229.46
X1135	0.05708	0.0014	0.60354	0.01432	0.07669	0.00082	0.02485	0.00037	494	53.71	479.5	9.07	476.4	4.93	496.1	7.28	476.4	4.93	151.68	268.32
X1136	0.07907	0.00184	2.17035	0.04879	0.19909	0.00223	0.06031	0.00087	1173.9	45.45	1171.6	15.62	1170.4	11.98	1183.6	16.65	1173.9	45.45	88.58	110.72
X1137	0.05315	0.00187	0.31599	0.0108	0.04312	0.00052	0.01364	0.00024	335.1	77.72	278.8	8.33	272.2	3.2	273.9	4.78	272.2	3.2	167.97	227.75
X1138	0.0718	0.00236	1.60973	0.05124	0.16262	0.00207	0.05048	0.00087	980.1	65.52	974	19.93	971.3	11.48	995.4	16.66	971.3	11.48	61.02	62.49
X1139	0.0571	0.00132	0.61599	0.01373	0.07824	0.00083	0.02476	0.00034	494.9	50.56	487.3	8.63	485.6	4.94	494.3	6.76	485.6	4.94	191.83	313.8
X1140	0.05512	0.00195	0.40571	0.01397	0.05338	0.00065	0.01721	0.00029	417.1	76.77	345.8	10.09	335.3	3.98	344.9	5.84	335.3	3.98	143.52	169.19
X1141	0.0572	0.0013	0.54789	0.01202	0.06947	0.00073	0.02278	0.00034	498.7	49.74	443.6	7.89	433	4.4	455.3	6.65	433	4.4	175.47	373.42
X1142	0.05689	0.00114	0.58705	0.01136	0.07484	0.00076	0.02334	0.00029	486.8	43.9	469	7.27	465.2	4.57	466.4	5.78	465.2	4.57	284.18	465.44
X1143	0.09408	0.00128	3.42403	0.04436	0.26397	0.00258	0.079	0.00099	1509.7	25.55	1509.9	10.18	1510.1	13.17	1536.7	18.5	1509.7	25.55	233.52	774.31
X1144	0.10257	0.00175	4.22904	0.06891	0.29905	0.00312	0.08976	0.00106	1671.1	31.19	1679.7	13.38	1686.6	15.51	1737.5	19.63	1671.1	31.19	114.5	120.12
X1145	0.05409	0.00195	0.37604	0.01319	0.05042	0.00061	0.01561	0.00029	374.7	78.93	324.1	9.73	317.1	3.77	313.1	5.81	317.1	3.77	172.07	244.4
X1146	0.05761	0.00178	0.59293	0.01783	0.07465	0.00087	0.02985	0.00076	514.6	66.92	472.7	11.36	464.1	5.21	594.5	14.88	464.1	5.21	60.14	292.12
X1147	0.05609	0.00133	0.58903	0.01352	0.07617	0.00081	0.02318	0.00033	455.5	51.69	470.2	8.64	473.2	4.83	463.1	6.6	473.2	4.83	174.5	291.52
X1148	0.05581	0.00102	0.5243	0.00924	0.06813	0.00068	0.02523	0.00058	444.5	39.85	428	6.15	424.9	4.1	503.6	11.34	424.9	4.1	59.47	801.22
X1149	0.05634	0.00136	0.56244	0.01311	0.07241	0.00077	0.02272	0.00033	464.9	52.96	453.1	8.52	450.6	4.63	454.1	6.42	450.6	4.63	190.9	306.74
X1150	0.05726	0.00145	0.56027	0.01375	0.07096	0.00077	0.02244	0.00031	501.2	55.32	451.7	8.95	441.9	4.62	448.5	6.05	441.9	4.62	264.95	320.03
XSG_41.3 Ma
X2001	0.0521	0.00233	0.44099	0.01925	0.06139	0.00083	0.02011	0.00051	289.8	98.95	371	13.57	384.1	5.07	402.4	10.07	384.1	5.07	60.72	123.89
X2002	0.0503	0.00163	0.31758	0.01006	0.0458	0.00054	0.01509	0.00024	208.8	73.6	280	7.75	288.7	3.32	302.8	4.69	288.7	3.32	260.37	316.4
X2003	0.0686	0.00133	1.51906	0.02849	0.16062	0.0017	0.05006	0.00107	886.7	39.51	938.1	11.49	960.2	9.45	987.2	20.6	960.2	9.45	39.55	236.47
X2004	0.05643	0.00158	0.6321	0.01718	0.08125	0.00093	0.02654	0.00047	468.5	61.01	497.4	10.69	503.6	5.54	529.5	9.3	503.6	5.54	112.49	238.94
X2005	0.06059	0.0012	0.63625	0.01222	0.07617	0.0008	0.02541	0.00031	624.7	42.14	500	7.58	473.2	4.78	507.2	6.17	473.2	4.78	351.33	501.69
X2006	0.05254	0.00186	0.31033	0.01071	0.04284	0.00053	0.01437	0.00027	309.1	78.68	274.4	8.3	270.4	3.26	288.4	5.34	270.4	3.26	192.23	299.14
X2007	0.05689	0.00122	0.65654	0.01363	0.08371	0.00089	0.02718	0.00037	486.6	46.63	512.5	8.35	518.2	5.28	542.1	7.34	518.2	5.28	227.74	417.01
X2008	0.07234	0.00124	1.50006	0.02488	0.15041	0.00155	0.05169	0.00081	995.5	34.49	930.4	10.1	903.2	8.71	1018.7	15.57	903.2	8.71	87.76	360.12
X2009	0.07492	0.00122	1.84074	0.02895	0.1782	0.00183	0.0636	0.00111	1066.4	32.39	1060.1	10.35	1057.2	10	1246.4	21.18	1066.4	32.39	51.18	344.32
X2010	0.05771	0.00123	0.6786	0.01408	0.08529	0.00091	0.02852	0.00032	518.5	46.47	525.9	8.52	527.6	5.38	568.3	6.19	527.6	5.38	562.37	413.78
X2011	0.05166	0.00256	0.53672	0.02616	0.07536	0.00102	0.02318	0.00068	270.3	109.76	436.3	17.28	468.3	6.09	463.1	13.38	468.3	6.09	80.49	215.28
X2012	0.05586	0.00135	0.63992	0.015	0.08309	0.00091	0.02715	0.0004	446.4	52.5	502.3	9.29	514.5	5.39	541.5	7.89	514.5	5.39	181.65	322.46
X2013	0.05811	0.0023	0.61871	0.02382	0.07723	0.00103	0.02516	0.00053	533.3	84.83	489	14.94	479.5	6.17	502.3	10.38	479.5	6.17	324	467.4
X2014	0.05393	0.00144	0.55969	0.01453	0.07527	0.00084	0.02621	0.00049	368	58.88	451.3	9.46	467.8	5.04	523	9.66	467.8	5.04	93.04	278.11
X2015	0.07273	0.00116	1.62859	0.02506	0.16241	0.00165	0.05415	0.00069	1006.4	32.01	981.3	9.68	970.2	9.17	1065.8	13.14	970.2	9.17	305.83	768.01
X2016	0.05888	0.00174	0.65915	0.01891	0.0812	0.00095	0.0264	0.00049	562.5	63.03	514.1	11.57	503.3	5.68	526.8	9.61	503.3	5.68	137.6	273.24
X2017	0.05629	0.00105	0.61287	0.01105	0.07897	0.00081	0.0257	0.00032	463.1	40.99	485.4	6.96	489.9	4.84	512.9	6.32	489.9	4.84	370.4	701.42
X2018	0.08891	0.00218	3.04111	0.07196	0.24807	0.00296	0.07349	0.00155	1402.3	46.09	1418	18.08	1428.5	15.28	1433.4	29.18	1402.3	46.09	29.79	71.65
X2019	0.07089	0.00108	1.63028	0.02401	0.16679	0.00168	0.05455	0.00058	954.3	30.89	982	9.27	994.4	9.29	1073.5	11.08	994.4	9.29	356.96	438.17
X2020	0.05542	0.0017	0.58945	0.01757	0.07714	0.00091	0.02417	0.00049	429	66.52	470.5	11.22	479	5.42	482.6	9.72	479	5.42	86	209.75
X2021	0.05364	0.00464	0.29768	0.02511	0.04025	0.00088	0.0126	0.00027	355.7	183.77	264.6	19.64	254.4	5.46	253.1	5.46	254.4	5.46	821.87	271.05
X2022	0.05361	0.00131	0.46374	0.01099	0.06274	0.00068	0.02177	0.00034	354.6	54.16	386.9	7.62	392.3	4.13	435.2	6.81	392.3	4.13	176.22	411.39
X2023	0.0545	0.00115	0.49768	0.0102	0.06623	0.00069	0.02215	0.0005	391.6	46.39	410.1	6.91	413.4	4.2	442.8	9.82	413.4	4.2	65.32	523.74
X2025	0.07653	0.00155	1.96616	0.03839	0.18632	0.00202	0.06298	0.00137	1109.1	39.81	1104	13.14	1101.4	10.95	1234.5	26.05	1109.1	39.81	79.07	461.38
X2026	0.05085	0.00156	0.28667	0.0086	0.04089	0.00047	0.01301	0.00022	233.9	69.52	255.9	6.79	258.3	2.91	261.2	4.43	258.3	2.91	248.59	404.42
X2027	0.05786	0.00143	0.63349	0.0152	0.07941	0.00087	0.02389	0.00035	524.2	53.51	498.3	9.45	492.6	5.21	477.2	6.89	492.6	5.21	206.53	304.6
X2029	0.05512	0.0011	0.53202	0.01033	0.07	0.00073	0.02295	0.0003	417.1	43.43	433.2	6.84	436.1	4.37	458.7	5.85	436.1	4.37	312.05	584.46
X2030	0.05363	0.00146	0.48654	0.01288	0.06579	0.00074	0.02105	0.00034	355.6	60.27	402.5	8.8	410.8	4.45	421.1	6.64	410.8	4.45	192.88	339.95
X2031	0.05731	0.00169	0.67542	0.01943	0.08548	0.001	0.0281	0.00074	502.9	64.25	524	11.77	528.7	5.91	560.2	14.49	528.7	5.91	44.3	199.45
X2032	0.08985	0.00226	2.91312	0.07072	0.23515	0.00282	0.08007	0.00154	1422.2	47.19	1385.3	18.35	1361.4	14.71	1556.9	28.88	1422.2	47.19	28.53	59.72
X2033	0.05107	0.00279	0.28309	0.0151	0.04021	0.0006	0.01326	0.00032	243.8	120.94	253.1	11.95	254.1	3.75	266.2	6.29	254.1	3.75	99.29	124.18
X2034	0.057	0.00113	0.53021	0.01023	0.06746	0.0007	0.02222	0.00028	490.9	43.36	432	6.79	420.9	4.23	444.2	5.6	420.9	4.23	423.51	753.46
X2035	0.05755	0.00191	0.60254	0.01942	0.07593	0.00092	0.02565	0.00055	512.5	71.51	478.8	12.3	471.8	5.54	511.9	10.89	471.8	5.54	78.18	185.67
X2036	0.05702	0.00117	0.64621	0.01281	0.0822	0.00086	0.02568	0.0003	491.6	44.48	506.1	7.9	509.2	5.11	512.5	5.91	509.2	5.11	483.73	526.24
X2037	0.05739	0.00152	0.64903	0.01675	0.08201	0.00092	0.02567	0.00049	506.2	57.76	507.9	10.31	508.1	5.47	512.2	9.58	508.1	5.47	90.54	244.91
X2038	0.14164	0.00237	8.13045	0.1305	0.41632	0.0046	0.13482	0.00211	2247.3	28.58	2245.6	14.51	2243.7	20.92	2556.3	37.58	2247.3	28.58	46.12	102.13
X2039	0.09487	0.00199	3.51955	0.07118	0.26906	0.00304	0.08275	0.0012	1525.4	38.96	1531.6	15.99	1536	15.43	1607	22.45	1525.4	38.96	84.98	113.78
X2040	0.05846	0.0017	0.68045	0.01921	0.08442	0.00097	0.03193	0.00067	547	62.16	527	11.61	522.4	5.79	635.4	13.1	522.4	5.79	59.68	206.37
X2041	0.05699	0.00136	0.66993	0.01559	0.08526	0.00093	0.02653	0.00041	490.5	52.57	520.7	9.48	527.4	5.5	529.3	8.12	527.4	5.5	154.14	313.73
X2042	0.05702	0.00129	0.67171	0.01479	0.08543	0.00091	0.02748	0.00039	491.9	49.14	521.8	8.98	528.4	5.43	548	7.68	528.4	5.43	205.78	373.12
X2043	0.10354	0.00256	4.29521	0.10235	0.30085	0.00371	0.08628	0.00131	1688.5	44.85	1692.4	19.63	1695.5	18.4	1672.8	24.46	1688.5	44.85	83.96	73.9
X2044	0.05453	0.00204	0.45427	0.01655	0.06042	0.00076	0.01947	0.00031	392.9	81.02	380.3	11.56	378.2	4.62	389.8	6.23	378.2	4.62	181.27	164.24
X2045	0.0554	0.00102	0.56479	0.01009	0.07394	0.00075	0.02499	0.00034	428	40.09	454.6	6.55	459.9	4.52	498.8	6.64	459.9	4.52	244.9	702.8
X2046	0.05569	0.00121	0.5248	0.01111	0.06834	0.00072	0.02201	0.00027	439.9	47.45	428.4	7.4	426.1	4.35	440.1	5.26	426.1	4.35	420.95	479.38
X2047	0.06636	0.00121	1.28761	0.02267	0.14072	0.00145	0.04457	0.00061	817.7	37.58	840.2	10.06	848.8	8.21	881.4	11.77	848.8	8.21	133.33	322.08
X2048	0.08751	0.00149	2.84775	0.04667	0.236	0.00246	0.06884	0.00075	1371.8	32.33	1368.2	12.32	1365.9	12.85	1345.6	14.19	1371.8	32.33	539.46	421.87
X2049	0.05816	0.00116	0.62976	0.0122	0.07853	0.00082	0.02572	0.00033	535.1	43.68	495.9	7.6	487.4	4.87	513.3	6.46	487.4	4.87	311.14	533.16
X2050	0.05688	0.00123	0.61091	0.01285	0.07789	0.00082	0.02506	0.00035	486.4	47.26	484.1	8.1	483.5	4.91	500.2	6.97	483.5	4.91	191.92	391.81
X2051	0.05823	0.00128	0.65012	0.0139	0.08096	0.00086	0.02606	0.00035	538	48.1	508.6	8.55	501.9	5.13	519.9	6.97	501.9	5.13	228.12	373.98
X2052	0.07036	0.00144	1.57615	0.03131	0.16246	0.00174	0.04609	0.00112	938.9	41.51	960.9	12.34	970.4	9.64	910.7	21.57	970.4	9.64	29.84	205.15
X2054	0.05686	0.00119	0.60411	0.01229	0.07706	0.00081	0.02501	0.00044	485.3	45.84	479.8	7.78	478.5	4.83	499.4	8.75	478.5	4.83	107.86	469.5
X2055	0.05778	0.00124	0.60372	0.01261	0.07578	0.0008	0.0248	0.00032	521.3	46.77	479.6	7.99	470.9	4.78	495.1	6.22	470.9	4.78	299.86	438.21
X2056	0.05596	0.0012	0.51789	0.01079	0.06712	0.0007	0.02074	0.00029	450.4	46.78	423.7	7.22	418.8	4.26	414.9	5.75	418.8	4.26	291.59	569
X2057	0.16632	0.0023	11.1806	0.14807	0.48752	0.00508	0.13179	0.00155	2521	23.04	2538.3	12.34	2559.9	22.03	2502.3	27.74	2521	23.04	267.14	329.05
X2059	0.09083	0.00153	3.16429	0.05136	0.25267	0.00264	0.07464	0.00092	1442.8	31.77	1448.5	12.52	1452.2	13.57	1455	17.31	1442.8	31.77	108.52	154.9
X2060	0.05784	0.00155	0.61989	0.01611	0.07772	0.00087	0.02545	0.00043	523.6	57.84	489.8	10.1	482.5	5.21	507.9	8.49	482.5	5.21	127.92	262.7
X2061	0.0566	0.00207	0.55128	0.01967	0.07064	0.00089	0.02323	0.00045	475.1	79.77	445.8	12.88	440	5.36	464.1	8.9	440	5.36	100.64	153.58
X2062	0.0585	0.00166	0.58837	0.01623	0.07294	0.00083	0.02515	0.00042	548.5	60.82	469.8	10.38	453.9	5.01	502	8.23	453.9	5.01	253.61	454.2
X2063	0.05376	0.00162	0.36912	0.01081	0.04979	0.00057	0.01639	0.00024	361	66.35	319	8.02	313.3	3.51	328.6	4.87	313.3	3.51	283.72	347.83
X2064	0.05854	0.00126	0.6575	0.01369	0.08146	0.00086	0.02691	0.00037	550	46.22	513.1	8.39	504.8	5.12	536.7	7.25	504.8	5.12	317.68	597.58
X2065	0.05764	0.00117	0.61596	0.01216	0.0775	0.00081	0.02432	0.00038	515.8	44.41	487.3	7.64	481.2	4.82	485.6	7.54	481.2	4.82	164.78	511.79
X2066	0.07085	0.00119	1.54871	0.02514	0.15854	0.00161	0.0509	0.00103	953	34.3	950	10.02	948.6	8.98	1003.4	19.77	948.6	8.98	43.31	367.9
X2067	0.05582	0.00185	0.53578	0.01726	0.06961	0.00084	0.023	0.00042	445	71.94	435.6	11.41	433.8	5.04	459.5	8.26	433.8	5.04	120.51	197.19
X2068	0.09756	0.00175	3.61734	0.06261	0.2689	0.00288	0.07833	0.00112	1578.1	33.28	1553.4	13.77	1535.2	14.61	1524.3	21.08	1578.1	33.28	80.2	150.78
X2070	0.05032	0.00286	0.267	0.01485	0.03848	0.00059	0.0126	0.00028	209.8	126.78	240.3	11.9	243.4	3.65	253	5.54	243.4	3.65	117.42	112.6
X2071	0.05633	0.00156	0.59827	0.01616	0.07703	0.00087	0.02595	0.00048	464.6	60.85	476.1	10.27	478.4	5.19	517.8	9.36	478.4	5.19	96.4	242.41
X2072	0.05816	0.00197	0.59333	0.01955	0.07398	0.0009	0.02414	0.00041	535.3	72.96	473	12.46	460.1	5.41	482.2	8.11	460.1	5.41	167.53	209.19
X2073	0.05734	0.0012	0.52504	0.01071	0.06639	0.00071	0.02122	0.00027	504.3	45.82	428.5	7.13	414.4	4.27	424.4	5.37	414.4	4.27	391.17	656.4
X2074	0.05268	0.00207	0.31723	0.0122	0.04367	0.00056	0.01419	0.00023	315.1	87.13	279.8	9.41	275.5	3.47	284.7	4.6	275.5	3.47	244.08	227.02
X2075	0.05804	0.00147	0.63435	0.01569	0.07925	0.00089	0.02492	0.0004	531	55.02	498.8	9.75	491.7	5.3	497.5	7.82	491.7	5.3	148.95	298.42
X2076	0.07033	0.00116	1.48851	0.02395	0.15348	0.00159	0.04568	0.00066	937.9	33.52	925.7	9.77	920.5	8.87	902.9	12.78	920.5	8.87	101.41	384.64
X2077	0.10133	0.00204	4.0985	0.08	0.29331	0.00333	0.08146	0.00175	1648.6	36.86	1654	15.93	1658	16.61	1582.8	32.75	1648.6	36.86	24.07	91.4
X2078	0.05771	0.00128	0.61939	0.01344	0.07784	0.00084	0.02377	0.00032	518.4	48.39	489.5	8.43	483.2	5.02	474.9	6.31	483.2	5.02	280.62	454.78
X2079	0.05788	0.00158	0.62022	0.01652	0.07771	0.00089	0.02398	0.00043	524.9	59.06	490	10.35	482.4	5.3	479.1	8.56	482.4	5.3	101.14	231.81
X2080	0.05744	0.00226	0.59599	0.02285	0.07524	0.00099	0.02245	0.00043	508.2	84.96	474.7	14.54	467.7	5.94	448.8	8.48	467.7	5.94	121.96	142.14
X2081	0.07111	0.00148	1.57835	0.03192	0.16096	0.00175	0.05089	0.00079	960.6	41.92	961.7	12.57	962.1	9.73	1003.2	15.11	962.1	9.73	83.11	199.46
X2082	0.05854	0.0012	0.64173	0.01284	0.0795	0.00084	0.02615	0.00034	549.9	44.18	503.4	7.94	493.2	5.03	521.8	6.61	493.2	5.03	256	461.25
X2083	0.07071	0.0014	1.54061	0.02968	0.15801	0.00169	0.04824	0.0008	949	40.04	946.7	11.86	945.7	9.43	952.2	15.45	945.7	9.43	67.07	219.31
X2086	0.05713	0.00113	0.61308	0.01176	0.07782	0.00081	0.02445	0.00031	496.1	42.77	485.5	7.4	483.1	4.87	488.3	6.03	483.1	4.87	312.49	550.7
X2087	0.05743	0.00118	0.62743	0.01257	0.07924	0.00084	0.0248	0.0003	507.5	45.04	494.5	7.84	491.6	4.99	495.1	5.97	491.6	4.99	344.75	495.78
X2089	0.05719	0.00171	0.61148	0.01779	0.07755	0.00091	0.02383	0.00036	498.2	64.95	484.5	11.21	481.5	5.43	475.9	7.06	481.5	5.43	223.62	249.2
X2090	0.10103	0.00142	4.03197	0.05468	0.28942	0.00294	0.087	0.00089	1643.2	25.8	1640.7	11.03	1638.6	14.72	1686.2	16.5	1643.2	25.8	271.67	291.5
X2091	0.06821	0.00136	1.27228	0.02457	0.13527	0.00144	0.04988	0.00092	875	40.65	833.4	10.98	817.8	8.17	983.8	17.66	817.8	8.17	42.64	227.21
X2092	0.1057	0.00147	4.46666	0.05982	0.30647	0.00311	0.08768	0.00113	1726.5	25.25	1724.8	11.11	1723.3	15.36	1698.9	21.04	1726.5	25.25	80.08	251.76
X2093	0.10855	0.00144	4.75273	0.06067	0.31754	0.0032	0.08942	0.00117	1775.1	23.98	1776.6	10.71	1777.7	15.64	1731.1	21.74	1775.1	23.98	86.01	345.32
X2094	0.0707	0.00176	1.49747	0.0363	0.15361	0.00175	0.04696	0.0008	948.8	50.25	929.4	14.76	921.2	9.8	927.6	15.4	921.2	9.8	59.98	115.34
X2096	0.05732	0.00136	0.59979	0.0139	0.07589	0.00083	0.02323	0.00043	503.4	52.04	477.1	8.82	471.5	4.95	464.2	8.5	471.5	4.95	97.93	336.29
X2097	0.05866	0.00168	0.64269	0.01792	0.07946	0.00091	0.0248	0.00059	554.5	61.29	504	11.08	492.9	5.46	495.1	11.7	492.9	5.46	48.61	189.79
X2098	0.07904	0.00286	2.1897	0.0771	0.20093	0.00279	0.06022	0.00119	1173.1	70.11	1177.8	24.54	1180.3	14.97	1181.9	22.65	1180.3	14.97	30.78	33.45
X2099	0.05834	0.00174	0.63678	0.01846	0.07916	0.00093	0.0258	0.00051	542.6	63.81	500.3	11.45	491.1	5.53	514.8	10.13	491.1	5.53	86.11	212.48
X2100	0.1147	0.0016	5.29979	0.07133	0.3351	0.00341	0.09599	0.00119	1875.2	25	1868.8	11.5	1863.1	16.48	1852.7	21.88	1875.2	25	220.87	522.3
X2101	0.07932	0.00151	2.2145	0.04067	0.20247	0.00216	0.06358	0.00078	1180.2	37.07	1185.6	12.85	1188.6	11.57	1246	14.87	1180.2	37.07	116.54	150.46
X2103	0.09918	0.00325	3.84073	0.12165	0.28085	0.00397	0.08186	0.00162	1608.8	59.8	1601.3	25.52	1595.7	19.97	1590.3	30.32	1608.8	59.8	35.44	36.33
X2104	0.12214	0.003	5.68717	0.13466	0.33771	0.0043	0.09937	0.00262	1987.7	43.09	1929.4	20.45	1875.7	20.73	1914.8	48.1	1987.7	43.09	31.97	98.98
X2105	0.05798	0.00157	0.58743	0.0155	0.07348	0.00083	0.02324	0.00037	528.7	58.76	469.2	9.92	457.1	4.98	464.3	7.39	457.1	4.98	220.14	384.91
X2107	0.06662	0.00114	1.08375	0.01793	0.11799	0.0012	0.05095	0.00077	825.8	35.31	745.5	8.74	719	6.93	1004.4	14.88	719	6.93	75.71	437.68
X2108	0.0537	0.0053	0.28715	0.02765	0.03878	0.00093	0.01059	0.00041	358.4	208.58	256.3	21.81	245.3	5.76	213	8.21	245.3	5.76	102.53	84.1
X2109	0.06028	0.00156	0.70082	0.01758	0.08432	0.00094	0.02583	0.00054	613.7	54.85	539.3	10.5	521.9	5.59	515.4	10.63	521.9	5.59	164.15	581.72
X2110	0.05605	0.00248	0.29472	0.0127	0.03814	0.00052	0.01177	0.00027	454	95.59	262.3	9.96	241.3	3.24	236.5	5.49	241.3	3.24	160.82	251.56
X2111	0.05915	0.00157	0.55523	0.0143	0.06809	0.00076	0.02465	0.00044	572.5	56.66	448.4	9.34	424.6	4.59	492.1	8.62	424.6	4.59	89.36	241.23
X2112	0.057	0.00131	0.58563	0.01303	0.07451	0.0008	0.02367	0.0003	491.1	49.7	468.1	8.34	463.3	4.77	472.9	5.93	463.3	4.77	295.4	372.02
X2113	0.09937	0.00179	3.88271	0.06731	0.28341	0.00304	0.09075	0.00108	1612.2	33.17	1610.1	14	1608.5	15.27	1755.8	20.06	1612.2	33.17	133.59	141.29
X2114	0.0567	0.0013	0.54073	0.01201	0.06917	0.00074	0.02197	0.00033	479.1	50.11	438.9	7.92	431.2	4.44	439.2	6.59	431.2	4.44	170.93	384.88
X2115	0.06984	0.00129	1.42078	0.02543	0.14756	0.00153	0.04749	0.00059	923.6	37.62	897.7	10.66	887.2	8.59	937.9	11.4	887.2	8.59	163.28	269.07
X2116	0.11298	0.0014	5.08373	0.06031	0.32637	0.0032	0.09401	0.00141	1847.8	22.31	1833.4	10.07	1820.8	15.56	1816.1	25.99	1847.8	22.31	55.49	471.94
X2117	0.05704	0.00118	0.53903	0.01081	0.06854	0.00071	0.02227	0.00031	492.3	44.99	437.8	7.13	427.4	4.3	445.2	6.16	427.4	4.3	238.99	555.4
X2118	0.05848	0.00156	0.62848	0.01626	0.07794	0.00087	0.02389	0.00041	547.9	57.14	495.1	10.14	483.8	5.2	477.2	8.12	483.8	5.2	128.75	270.29
X2119	0.05734	0.00124	0.63129	0.01323	0.07985	0.00084	0.0262	0.00035	504.2	47.34	496.9	8.24	495.2	5	522.8	6.93	495.2	5	203.4	372.07
X2120	0.05748	0.00135	0.45944	0.01045	0.05797	0.00062	0.01881	0.00027	509.8	51.13	383.9	7.27	363.3	3.78	376.6	5.32	363.3	3.78	317.65	566.14
X2121	0.0701	0.00166	1.4819	0.03397	0.15333	0.0017	0.05684	0.00085	931.2	47.88	923	13.9	919.6	9.5	1117.4	16.24	919.6	9.5	198.68	359.41
X2122	0.05885	0.00154	0.54646	0.01387	0.06735	0.00074	0.02093	0.00033	561.4	56.01	442.7	9.11	420.2	4.5	418.8	6.55	420.2	4.5	153.23	268
X2123	0.05804	0.002	0.64165	0.02157	0.08019	0.00098	0.02716	0.00054	530.8	74.33	503.3	13.34	497.2	5.87	541.6	10.68	497.2	5.87	78.96	147.15
X2124	0.05703	0.00118	0.58763	0.0118	0.07473	0.00077	0.02277	0.00029	492.2	45.09	469.4	7.54	464.6	4.64	455	5.79	464.6	4.64	295.24	482.69
X2125	0.07399	0.00108	1.81312	0.02538	0.17773	0.00175	0.05653	0.00061	1041.3	29.2	1050.2	9.16	1054.5	9.6	1111.4	11.72	1041.3	29.2	227.87	424.93
X2126	0.08288	0.00118	2.44636	0.03332	0.21409	0.00212	0.06638	0.00072	1266.4	27.47	1256.4	9.82	1250.6	11.23	1299.1	13.57	1266.4	27.47	201.93	351.51
X2127	0.05786	0.00112	0.57728	0.01075	0.07236	0.00074	0.02368	0.00031	524.2	41.96	462.7	6.92	450.4	4.43	473	6.03	450.4	4.43	259.37	547.86
X2128	0.0572	0.00193	0.53505	0.01754	0.06784	0.00082	0.02497	0.00048	498.8	73.07	435.2	11.6	423.1	4.94	498.5	9.5	423.1	4.94	81.38	164.14
X2129	0.07103	0.00136	1.47004	0.02704	0.15011	0.00156	0.04621	0.00094	958.3	38.53	918.1	11.11	901.6	8.73	913.1	18.24	901.6	8.73	57.29	347.6
X2130	0.05142	0.00198	0.2684	0.01007	0.03786	0.00047	0.01167	0.00022	259.6	86.03	241.4	8.06	239.6	2.92	234.6	4.48	239.6	2.92	168.73	234.68
X2131	0.05709	0.00116	0.59656	0.01169	0.07579	0.00078	0.02481	0.00033	494.6	44.01	475	7.43	470.9	4.66	495.3	6.42	470.9	4.66	228.84	451.1
X2132	0.06969	0.00225	1.37651	0.04302	0.14327	0.00179	0.04475	0.00112	919.1	64.91	878.9	18.38	863.1	10.09	884.9	21.75	863.1	10.09	64.64	181.07
X2133	0.0575	0.00126	0.563	0.01189	0.07102	0.00074	0.0231	0.00036	510.3	47.68	453.5	7.73	442.3	4.46	461.6	7.16	442.3	4.46	140.5	394.65
X2134	0.08808	0.00155	2.87716	0.04863	0.23692	0.00246	0.0701	0.00085	1384.3	33.41	1375.9	12.74	1370.7	12.83	1369.4	16.12	1384.3	33.41	285.72	363.28
X2135	0.13298	0.00164	6.83151	0.07977	0.3726	0.00363	0.11861	0.00129	2137.7	21.43	2089.8	10.34	2041.6	17.06	2265.6	23.34	2137.7	21.43	169.03	414.03
X2136	0.08155	0.00189	2.30634	0.05158	0.20512	0.0023	0.05806	0.00072	1234.8	44.65	1214.2	15.84	1202.8	12.32	1140.7	13.66	1234.8	44.65	256.48	168.15
X2137	0.05791	0.00128	0.58495	0.01248	0.07326	0.00077	0.02345	0.00034	526.2	47.94	467.6	7.99	455.7	4.6	468.5	6.68	455.7	4.6	178.91	371.78
X2138	0.0569	0.00112	0.55825	0.01065	0.07115	0.00072	0.02498	0.00063	487.2	43.27	450.4	6.94	443.1	4.35	498.7	12.41	443.1	4.35	41.88	514.62
X2139	0.06985	0.00121	1.44205	0.02401	0.14974	0.00151	0.04638	0.00075	923.9	35.24	906.6	9.98	899.5	8.46	916.3	14.4	899.5	8.46	84.93	372.49
X2140	0.05354	0.00232	0.27529	0.01163	0.03729	0.0005	0.015	0.00058	351.7	94.89	246.9	9.26	236	3.09	301	11.46	236	3.09	78.3	485.13
X2141	0.07282	0.00106	1.17856	0.01633	0.11739	0.00114	0.03716	0.00041	1008.9	29.22	790.6	7.61	715.5	6.6	737.4	7.91	715.5	6.6	298.5	598.46
X2143	0.05516	0.00161	0.45375	0.01283	0.05966	0.00067	0.01922	0.00033	418.6	63.18	379.9	8.96	373.6	4.07	384.7	6.63	373.6	4.07	122.97	237.41
X2144	0.05664	0.00119	0.58678	0.01195	0.07514	0.00077	0.02419	0.00031	476.9	46.41	468.8	7.65	467	4.62	483.2	6.16	467	4.62	237.11	406.32
X2145	0.11095	0.00233	4.93769	0.0994	0.32279	0.00368	0.09642	0.00137	1815	37.64	1808.7	17	1803.4	17.94	1860.5	25.35	1815	37.64	75.03	79.87
X2147	0.05661	0.00112	0.57904	0.01106	0.07419	0.00075	0.0234	0.00031	475.6	43.73	463.8	7.11	461.3	4.51	467.4	6.17	461.3	4.51	227.48	487.21
X2148	0.06008	0.00213	0.56647	0.01952	0.06838	0.00085	0.01893	0.00043	606.6	74.99	455.7	12.65	426.4	5.13	379.1	8.47	426.4	5.13	182.25	330.8
X2149	0.05595	0.00213	0.51207	0.01898	0.06638	0.00083	0.02154	0.00053	450	82.31	419.8	12.75	414.3	5.05	430.8	10.4	414.3	5.05	50.61	122.81
X2150	0.0544	0.00173	0.48127	0.01491	0.06416	0.00074	0.0208	0.00042	387.6	69.7	398.9	10.22	400.9	4.5	416.2	8.37	400.9	4.5	79.77	176.48
XSG_42.4 Ma
X3001	0.05479	0.00231	0.49274	0.02037	0.06533	0.00095	0.02314	0.00056	403.7	90.99	406.8	13.86	408	5.75	462.4	11.01	408	5.75	117.18	232.55
X3002	0.0561	0.00138	0.50778	0.01246	0.06575	0.0008	0.0205	0.0003	456.1	53.79	417	8.39	410.5	4.85	410.2	6	410.5	4.85	456.58	612.9
X3004	0.05563	0.00175	0.54498	0.01696	0.07115	0.00093	0.02141	0.00044	437.5	68.55	441.7	11.15	443.1	5.57	428.1	8.78	443.1	5.57	192.09	408.81
X3005	0.0533	0.00268	0.4356	0.0215	0.05936	0.00093	0.01963	0.00049	341.4	109.78	367.1	15.21	371.7	5.65	392.9	9.71	371.7	5.65	137.72	202.87
X3006	0.12552	0.0016	6.54546	0.08671	0.37872	0.00429	0.11335	0.00149	2036.2	22.39	2052	11.67	2070.3	20.06	2170.3	27.08	2036.2	22.39	146.59	401.41
X3007	0.07824	0.00204	2.10938	0.05426	0.19578	0.00252	0.06087	0.00104	1153	50.84	1151.9	17.72	1152.6	13.58	1194.4	19.85	1153	50.84	51.59	71.54
X3010	0.0579	0.00147	0.58077	0.01457	0.07282	0.00089	0.0245	0.00037	525.8	54.85	465	9.36	453.2	5.33	489.1	7.31	453.2	5.33	336.26	495.81
X3012	0.08169	0.00108	2.37937	0.03235	0.21146	0.00234	0.06572	0.00086	1238.2	25.67	1236.4	9.72	1236.6	12.47	1286.6	16.32	1238.2	25.67	107.54	395.47
X3013	0.0809	0.00227	2.33776	0.06455	0.20976	0.00279	0.06043	0.00114	1219	54.29	1223.8	19.64	1227.6	14.85	1186	21.73	1219	54.29	94.51	131.93
X3014	0.05545	0.00153	0.57595	0.01572	0.0754	0.00093	0.02517	0.00047	430	60.07	461.9	10.13	468.6	5.55	502.5	9.22	468.6	5.55	117	278.13
X3015	0.086	0.00123	2.74821	0.04	0.23195	0.00258	0.07078	0.00092	1338.2	27.5	1341.6	10.84	1344.7	13.52	1382.3	17.39	1338.2	27.5	186.79	457.03
X3016	0.1067	0.00142	4.5582	0.06175	0.31006	0.00344	0.09245	0.00136	1743.8	24.04	1741.7	11.28	1741	16.93	1787.3	25.12	1743.8	24.04	79.24	344.96
X3017	0.07024	0.00132	1.52606	0.02858	0.15768	0.00181	0.04605	0.00063	935.5	38.04	940.9	11.49	943.9	10.09	910	12.23	943.9	10.09	164.44	257.63
X3018	0.05361	0.00171	0.31743	0.00999	0.04297	0.00054	0.01382	0.00024	354.6	70.53	279.9	7.7	271.2	3.36	277.4	4.83	271.2	3.36	266.2	395.76
X3019	0.05306	0.00194	0.29034	0.01041	0.03971	0.00052	0.01191	0.00023	331.2	80.71	258.8	8.19	251	3.24	239.3	4.63	251	3.24	210.24	295.44
X3020	0.05108	0.00227	0.27331	0.0119	0.03883	0.00055	0.01245	0.0003	244.2	99.04	245.3	9.49	245.6	3.41	250.1	5.89	245.6	3.41	102.42	171.4
X3021	0.06992	0.00112	1.43744	0.0231	0.14919	0.00165	0.04857	0.00094	925.9	32.54	904.7	9.62	896.4	9.28	958.6	18.05	896.4	9.28	44.5	378.52
X3022	0.16187	0.00231	10.1056	0.14491	0.45301	0.0052	0.13354	0.00218	2475.3	23.88	2444.5	13.25	2408.6	23.09	2533.5	38.85	2475.3	23.88	90.99	281.63
X3023	0.05568	0.00143	0.51484	0.01308	0.06709	0.0008	0.02219	0.00044	439.3	56.05	421.7	8.77	418.6	4.83	443.6	8.7	418.6	4.83	99.98	317.68
X3024	0.0573	0.00149	0.62299	0.01593	0.07888	0.00094	0.02417	0.00064	502.7	56.58	491.7	9.97	489.5	5.64	482.7	12.73	489.5	5.64	61.69	362.47
X3025	0.05631	0.00159	0.58952	0.01641	0.07595	0.00092	0.02426	0.00041	463.9	61.94	470.6	10.48	471.9	5.52	484.5	8.14	471.9	5.52	119.21	208.52
X3026	0.10455	0.00182	4.34989	0.07509	0.30183	0.00349	0.10332	0.00136	1706.4	31.73	1702.9	14.25	1700.4	17.27	1987.4	24.84	1706.4	31.73	108.89	136.86
X3027	0.10216	0.00185	3.97486	0.07108	0.28225	0.00328	0.0839	0.00107	1663.8	33.11	1629.1	14.51	1602.7	16.49	1628.4	19.91	1663.8	33.11	146.81	131.22
X3028	0.06673	0.0021	1.2613	0.03893	0.13712	0.00179	0.04084	0.00078	829.4	64.37	828.5	17.48	828.3	10.13	809.1	15.2	828.3	10.13	75.99	110.36
X3029	0.05918	0.00118	0.65968	0.01302	0.08086	0.00091	0.025	0.00065	573.9	42.77	514.4	7.96	501.2	5.4	499	12.88	501.2	5.4	73.15	747.79
X3030	0.05126	0.00285	0.28138	0.01532	0.03982	0.00062	0.01292	0.00034	252.4	122.77	251.8	12.14	251.7	3.83	259.4	6.88	251.7	3.83	86.64	139.29
X3031	0.07071	0.00124	1.54581	0.02682	0.15857	0.00175	0.05049	0.00074	949	35.42	948.8	10.7	948.8	9.76	995.5	14.31	948.8	9.76	113.71	313.27
X3032	0.09906	0.00155	4.02499	0.06266	0.29472	0.00327	0.08576	0.001	1606.5	28.95	1639.3	12.66	1665.1	16.29	1663.1	18.65	1606.5	28.95	204.95	181.28
X3033	0.0561	0.00176	0.55788	0.01715	0.07213	0.0009	0.02325	0.00046	456	68.17	450.1	11.18	449	5.4	464.6	9.03	449	5.4	129.21	261.47
X3034	0.06938	0.00118	1.45819	0.02462	0.15244	0.00167	0.04921	0.00082	910.1	34.69	913.3	10.17	914.6	9.33	971	15.77	914.6	9.33	71.37	332.45
X3035	0.04843	0.0023	0.24766	0.01155	0.03709	0.00052	0.01154	0.00026	120.4	108.19	224.7	9.4	234.8	3.21	231.9	5.19	234.8	3.21	123.36	184.95
X3036	0.08626	0.0017	2.74775	0.05328	0.23104	0.00266	0.07303	0.00138	1343.9	37.64	1341.5	14.43	1339.9	13.95	1424.8	25.96	1343.9	37.64	31.53	107.36
X3037	0.0556	0.00175	0.48387	0.01491	0.06312	0.00078	0.02114	0.00046	436	68.39	400.7	10.2	394.6	4.73	422.8	9.18	394.6	4.73	75.74	201.9
X3038	0.09426	0.0013	3.44648	0.04716	0.26515	0.00282	0.08274	0.00097	1513.4	25.78	1515.1	10.77	1516.1	14.37	1606.7	18.05	1513.4	25.78	167.66	281.43
X3039	0.05115	0.00294	0.27394	0.01541	0.03884	0.00062	0.01334	0.00034	247.4	127.02	245.8	12.28	245.6	3.84	267.8	6.7	245.6	3.84	94.24	120.31
X3040	0.0564	0.00126	0.53726	0.01181	0.06908	0.00077	0.02188	0.0003	467.3	49.25	436.6	7.8	430.6	4.66	437.4	5.89	430.6	4.66	290.1	414.11
X3041	0.1066	0.00156	4.57629	0.06599	0.3113	0.00336	0.09526	0.00124	1742.1	26.44	1745	12.02	1747.1	16.54	1839.2	22.93	1742.1	26.44	98.09	201.35
X3042	0.05637	0.00154	0.59274	0.01588	0.07625	0.0009	0.02447	0.00044	466.1	59.89	472.6	10.13	473.7	5.37	488.7	8.75	473.7	5.37	107.21	235.69
X3043	0.05603	0.00143	0.55326	0.0138	0.07159	0.00082	0.02369	0.00038	453.4	55.44	447.1	9.02	445.8	4.95	473.2	7.52	445.8	4.95	156.76	301.83
X3044	0.05342	0.00132	0.38478	0.00933	0.05223	0.00059	0.01627	0.00025	346.5	55.01	330.5	6.84	328.2	3.62	326.2	4.95	328.2	3.62	243.56	424.3
X3045	0.05779	0.00148	0.63019	0.01582	0.07907	0.00091	0.02594	0.00044	521.7	55.47	496.2	9.85	490.6	5.46	517.6	8.66	490.6	5.46	128.41	267.1
X3046	0.05784	0.00152	0.59406	0.01529	0.07447	0.00087	0.02386	0.00041	523.7	56.9	473.5	9.74	463	5.2	476.6	8.09	463	5.2	186.3	381.3
X3047	0.06941	0.00111	1.49059	0.02355	0.15572	0.00165	0.04738	0.00056	910.9	32.72	926.6	9.6	932.9	9.2	935.7	10.83	932.9	9.2	250.58	363.18
X3048	0.05733	0.0015	0.53269	0.0136	0.06738	0.00078	0.02325	0.00052	503.6	56.89	433.6	9.01	420.3	4.7	464.5	10.2	420.3	4.7	141.66	627.83
X3049	0.06967	0.00106	1.48177	0.02209	0.1542	0.00161	0.04953	0.00069	918.7	30.91	923	9.04	924.5	8.98	977.1	13.28	924.5	8.98	121.89	466.05
X3050	0.05714	0.00168	0.57307	0.01651	0.07272	0.00087	0.02232	0.00046	496.2	64.23	460	10.66	452.5	5.22	446.3	9.1	452.5	5.22	92.4	225.48
X3052	0.09209	0.00189	3.18329	0.06354	0.25061	0.00288	0.07692	0.00117	1469.2	38.56	1453.1	15.42	1441.6	14.83	1497.7	21.87	1469.2	38.56	100.43	154.09
X3053	0.05653	0.00133	0.66888	0.01536	0.08579	0.00095	0.02661	0.00093	472.5	51.62	520	9.35	530.6	5.66	530.8	18.22	530.6	5.66	22.49	319.01
X3054	0.05392	0.00188	0.31838	0.01082	0.04281	0.00054	0.01426	0.00022	367.7	76.43	280.7	8.34	270.2	3.31	286.2	4.41	270.2	3.31	483.11	442.45
X3055	0.18648	0.00218	13.4911	0.15443	0.52451	0.00539	0.14703	0.00171	2711.4	19.17	2714.7	10.82	2718.3	22.8	2772.7	30.19	2711.4	19.17	165.57	340.88
X3056	0.10869	0.0025	4.78203	0.10644	0.31896	0.00393	0.0999	0.00151	1777.6	41.35	1781.7	18.69	1784.7	19.19	1924.5	27.71	1777.6	41.35	55.4	54.24
X3057	0.0573	0.00175	0.61871	0.01845	0.07828	0.00094	0.02431	0.00048	502.6	66.33	489	11.57	485.9	5.6	485.4	9.4	485.9	5.6	84.13	167.85
X3058	0.08803	0.00299	2.79219	0.09186	0.22995	0.00324	0.07747	0.00181	1383.2	63.69	1353.4	24.6	1334.3	17	1508.2	33.99	1383.2	63.69	28.3	49.72
X3059	0.05679	0.00121	0.61045	0.01271	0.07793	0.00084	0.0249	0.00035	482.7	46.73	483.8	8.01	483.8	5.02	497.2	6.93	483.8	5.02	234.77	431.63
X3061	0.0562	0.00184	0.5627	0.01793	0.07259	0.00088	0.02301	0.00041	459.4	71.18	453.3	11.65	451.7	5.3	459.9	8.09	451.7	5.3	117.25	164.33
X3062	0.10606	0.00139	4.56217	0.05811	0.31186	0.00317	0.09264	0.0011	1732.7	23.93	1742.4	10.61	1749.9	15.57	1790.7	20.3	1732.7	23.93	145.62	315.35
X3063	0.05617	0.00142	0.52739	0.01301	0.06807	0.00076	0.01982	0.00042	458.8	55.24	430.1	8.65	424.5	4.58	396.7	8.28	424.5	4.58	101.63	359.17
X3065	0.07715	0.00146	2.01876	0.037	0.1897	0.00203	0.05999	0.00084	1125.1	37.22	1121.8	12.44	1119.8	11.02	1177.6	16.02	1125.1	37.22	96.28	176.24
X3066	0.05242	0.00326	0.29888	0.01817	0.04134	0.00069	0.01481	0.00031	303.6	135.67	265.5	14.21	261.1	4.26	297.1	6.19	261.1	4.26	157.27	109.24
X3067	0.05643	0.00188	0.60834	0.01975	0.07816	0.00095	0.0241	0.00052	468.5	72.16	482.5	12.47	485.1	5.69	481.4	10.3	485.1	5.69	68.09	149.3
X3068	0.07006	0.00135	1.51487	0.0282	0.15677	0.00166	0.04755	0.00072	930	38.94	936.4	11.39	938.8	9.26	938.9	13.88	938.8	9.26	90.01	220.51
X3069	0.05675	0.00125	0.45389	0.0097	0.05798	0.00062	0.02041	0.00066	481.3	48.16	380	6.77	363.3	3.76	408.3	13.12	363.3	3.76	31.74	518.32
X3070	0.1102	0.00229	4.87645	0.09792	0.32081	0.00373	0.10013	0.00144	1802.7	37.39	1798.2	16.92	1793.7	18.22	1928.8	26.51	1802.7	37.39	67.91	73.29
X3071	0.05387	0.00264	0.3161	0.0151	0.04254	0.00061	0.01267	0.00026	365.3	106.17	278.9	11.65	268.6	3.79	254.5	5.23	268.6	3.79	167.69	153.68
X3073	0.05284	0.00252	0.32283	0.01502	0.0443	0.00062	0.01585	0.00039	321.9	104.65	284.1	11.53	279.4	3.85	317.9	7.76	279.4	3.85	86.36	159
X3074	0.07099	0.0011	1.42047	0.02123	0.14508	0.00145	0.04755	0.00075	957.1	31.07	897.6	8.9	873.3	8.19	939	14.49	873.3	8.19	104.71	594.32
X3075	0.05205	0.00193	0.29288	0.01058	0.0408	0.00051	0.06322	0.00433	287.6	82.44	260.8	8.31	257.8	3.14	1239	82.41	257.8	3.14	9.43	1026.87
X3076	0.05471	0.00165	0.53092	0.0156	0.07036	0.00081	0.02142	0.00034	400.1	65.98	432.4	10.35	438.3	4.9	428.4	6.72	438.3	4.9	205.22	255.28
X3077	0.0698	0.00171	1.32392	0.0314	0.13752	0.00155	0.04235	0.00079	922.5	49.6	856.2	13.72	830.6	8.76	838.4	15.3	830.6	8.76	187.36	462.33
X3078	0.08649	0.00187	2.77042	0.05766	0.23225	0.00259	0.07628	0.00111	1349.1	41.12	1347.6	15.53	1346.3	13.57	1485.8	20.86	1349.1	41.12	99.04	138.42
X3079	0.05729	0.00186	0.54204	0.01712	0.0686	0.00082	0.02243	0.00045	502.4	70.5	439.8	11.27	427.7	4.96	448.4	8.88	427.7	4.96	147.45	300.47
X3080	0.08613	0.00165	2.67968	0.0494	0.22558	0.00241	0.06799	0.00109	1341.1	36.64	1322.9	13.63	1311.3	12.68	1329.5	20.56	1341.1	36.64	121.75	290.2
X3081	0.11906	0.00147	5.85859	0.06833	0.35679	0.00348	0.10855	0.00138	1942.2	21.87	1955.1	10.12	1966.9	16.54	2083	25.21	1942.2	21.87	70.3	297.21
X3082	0.14552	0.00238	8.38555	0.13081	0.41784	0.00454	0.1112	0.00173	2293.9	27.86	2273.6	14.15	2250.7	20.63	2131.1	31.47	2293.9	27.86	147.17	274.6
X3083	0.15589	0.002	9.69888	0.11797	0.45114	0.00451	0.1423	0.0036	2411.6	21.67	2406.6	11.2	2400.3	20.04	2689	63.63	2411.6	21.67	27.28	507.44
X3084	0.05203	0.00288	0.25956	0.01401	0.03617	0.00055	0.01077	0.00032	286.8	121.78	234.3	11.3	229.1	3.44	216.6	6.34	229.1	3.44	157.25	266.81
X3087	0.05633	0.00142	0.5591	0.01363	0.07198	0.00077	0.02299	0.00038	464.7	55.39	450.9	8.88	448.1	4.66	459.4	7.53	448.1	4.66	134.72	296.74
X3088	0.05866	0.00183	0.466	0.01408	0.05761	0.00067	0.02097	0.00112	554.4	66.63	388.4	9.75	361.1	4.1	419.4	22.09	361.1	4.1	29.06	617.15
X3089	0.0514	0.00267	0.26204	0.01327	0.03697	0.00053	0.01187	0.0002	258.7	114.88	236.3	10.68	234.1	3.31	238.5	4.09	234.1	3.31	230.34	136.99
X3090	0.06583	0.00163	1.01168	0.02414	0.11145	0.00122	0.04315	0.0007	801.1	51	709.7	12.18	681.2	7.08	853.8	13.51	681.2	7.08	163.98	357
X3092	0.1065	0.00228	4.49536	0.09195	0.30613	0.00348	0.09243	0.00168	1740.4	38.66	1730.1	16.99	1721.6	17.19	1786.9	31	1740.4	38.66	81.79	169.79
X3094	0.06968	0.00163	1.222	0.02751	0.12721	0.00137	0.0415	0.00074	918.8	47.43	810.7	12.57	771.9	7.86	821.9	14.34	771.9	7.86	134.97	357.74
X3096	0.05181	0.00207	0.29081	0.01133	0.04071	0.00051	0.01357	0.00029	277.1	89.02	259.2	8.91	257.2	3.17	272.5	5.79	257.2	3.17	111.08	201.36
XSG_45.3 Ma
X4001	0.05568	0.00127	0.4978	0.01101	0.06485	0.00069	0.01448	0.00018	439.3	49.66	410.2	7.46	405	4.16	290.6	3.58	405	4.16	734.11	581.97
X4005	0.11384	0.00228	5.21932	0.10046	0.33253	0.00379	0.09238	0.00129	1861.6	35.74	1855.8	16.4	1850.6	18.31	1786	23.84	1861.6	35.74	195.34	196.13
X4006	0.09311	0.00211	3.34404	0.07313	0.26048	0.003	0.07495	0.00113	1490.2	42.34	1491.4	17.09	1492.3	15.36	1460.8	21.25	1490.2	42.34	131.58	156.25
X4007	0.05571	0.00168	0.50012	0.01469	0.06511	0.00075	0.01991	0.00034	440.4	65.72	411.8	9.94	406.7	4.56	398.4	6.68	406.7	4.56	326.86	501.31
X4009	0.05732	0.00239	0.55158	0.02244	0.06979	0.00094	0.02373	0.00038	503.5	90.06	446	14.68	434.9	5.65	474.1	7.54	434.9	5.65	212.9	155.13
X4010	0.05814	0.00127	0.66687	0.01411	0.0832	0.00088	0.02819	0.00036	534.4	47.64	518.8	8.59	515.2	5.21	561.9	7.01	515.2	5.21	429.87	586.11
X4012	0.05991	0.00248	0.6742	0.02718	0.08163	0.00111	0.02793	0.0005	600.2	87.29	523.3	16.49	505.8	6.62	556.8	9.78	505.8	6.62	204.87	188.88
X4013	0.07195	0.00142	1.53664	0.02924	0.1549	0.00163	0.04595	0.00113	984.5	39.67	945.2	11.71	928.4	9.1	908.1	21.78	928.4	9.1	55.92	445.2
X4014	0.12374	0.00255	6.23907	0.12352	0.3657	0.00428	0.11647	0.0039	2010.8	36.14	2009.9	17.33	2009.2	20.21	2226.8	70.6	2010.8	36.14	42.52	367.73
X4015	0.0954	0.00284	3.45314	0.09928	0.26253	0.00347	0.07107	0.00142	1536	55.01	1516.6	22.64	1502.8	17.7	1387.7	26.7	1536	55.01	86.02	105.64
X4016	0.05957	0.00173	0.58897	0.01656	0.07171	0.00082	0.02133	0.0004	588	61.64	470.2	10.58	446.5	4.96	426.5	7.99	446.5	4.96	227.01	470.06
X4017	0.05744	0.0017	0.55836	0.01603	0.0705	0.00081	0.02156	0.00032	508	64.14	450.5	10.45	439.2	4.89	431.2	6.24	439.2	4.89	432.27	438.93
X4018	0.06982	0.00267	1.16531	0.04319	0.12106	0.00165	0.03487	0.00092	923	76.63	784.4	20.25	736.6	9.51	692.8	17.92	736.6	9.51	95.91	191.48
X4019	0.05608	0.00178	0.55041	0.01698	0.07118	0.00084	0.02136	0.00046	455.3	69	445.3	11.12	443.3	5.05	427.3	9.1	443.3	5.05	100.33	241.33
X4020	0.06169	0.00284	0.59357	0.02654	0.06979	0.00102	0.02586	0.00089	663.4	95.65	473.1	16.91	434.9	6.12	516.1	17.52	434.9	6.12	115.81	406.21
X4021	0.05731	0.00177	0.5622	0.01685	0.07114	0.00083	0.0226	0.00043	503.1	66.96	453	10.95	443	5	451.7	8.43	443	5	121.74	242.81
X4022	0.05633	0.00131	0.56992	0.01289	0.07338	0.00078	0.02373	0.00031	464.7	51.35	458	8.34	456.5	4.69	474	6.2	456.5	4.69	348.4	473.43
X4024	0.05627	0.00138	0.56408	0.01339	0.07271	0.00078	0.02169	0.00034	462.2	53.83	454.2	8.69	452.4	4.71	433.7	6.7	452.4	4.71	316.65	593.01
X4027	0.06035	0.00146	0.49974	0.01169	0.06006	0.00065	0.01921	0.00047	616	51.38	411.5	7.92	376	3.95	384.7	9.3	376	3.95	161.99	998.68
X4028	0.05209	0.0025	0.24106	0.01128	0.03357	0.00047	0.0107	0.00022	289.3	106.14	219.3	9.23	212.8	2.95	215	4.32	212.8	2.95	552.97	549.53
X4029	0.07023	0.00124	1.36266	0.02313	0.14072	0.00143	0.04011	0.00046	935.1	35.8	873	9.94	848.8	8.09	794.9	9.02	848.8	8.09	384.06	448.88
X4030	0.07022	0.00122	1.48754	0.02477	0.15364	0.00156	0.0428	0.00093	934.9	35.13	925.3	10.11	921.3	8.71	847.1	17.99	921.3	8.71	53.34	450.36
X4031	0.05753	0.00224	0.53211	0.02013	0.06708	0.00087	0.02042	0.00046	511.7	83.19	433.2	13.34	418.5	5.25	408.5	9.07	418.5	5.25	93.52	144.25
X4032	0.05559	0.00153	0.5093	0.01365	0.06645	0.00074	0.02033	0.00038	435.6	60.03	418	9.18	414.7	4.47	406.7	7.46	414.7	4.47	123.81	297.09
X4033	0.0552	0.00163	0.49315	0.01415	0.06479	0.00074	0.02055	0.00033	420.4	64.1	407.1	9.62	404.7	4.47	411.1	6.61	404.7	4.47	276.04	415.19
X4035	0.10268	0.00219	4.16765	0.0854	0.29438	0.00336	0.08737	0.0012	1673.1	38.89	1667.7	16.78	1663.4	16.72	1693.1	22.37	1673.1	38.89	116.41	112.44
X4036	0.1918	0.00228	14.0984	0.15827	0.5331	0.00526	0.14291	0.00154	2757.7	19.37	2756.3	10.64	2754.5	22.11	2699.8	27.18	2757.7	19.37	122.69	185.44
X4037	0.05722	0.00313	0.3416	0.01817	0.0433	0.00068	0.01403	0.00031	499.3	116.53	298.4	13.75	273.3	4.19	281.6	6.2	273.3	4.19	178.62	160.29
X4038	0.15176	0.0026	8.81274	0.14387	0.42117	0.00468	0.12433	0.00198	2365.8	28.9	2318.8	14.89	2265.8	21.22	2368.6	35.59	2365.8	28.9	101.37	191.9
X4039	0.07255	0.00127	1.64672	0.0276	0.16463	0.00167	0.04938	0.00071	1001.3	35.04	988.3	10.59	982.4	9.27	974.2	13.65	982.4	9.27	133.3	367.16
X4040	0.11966	0.00143	5.82522	0.06563	0.35306	0.00341	0.10764	0.00151	1951.2	21.15	1950.2	9.76	1949.2	16.25	2066.3	27.6	1951.2	21.15	123.16	1008.31
X4042	0.07343	0.00158	1.65358	0.03419	0.16333	0.00176	0.05229	0.00078	1025.8	42.79	990.9	13.08	975.2	9.74	1030.2	15.01	975.2	9.74	155.61	291.73
X4043	0.05923	0.00207	0.57756	0.01964	0.07072	0.00087	0.02259	0.00046	575.7	74.29	462.9	12.64	440.5	5.25	451.5	9.16	440.5	5.25	97.66	174.08
X4044	0.05829	0.00283	0.52281	0.02473	0.06505	0.00096	0.02114	0.00044	540.2	103.59	427	16.49	406.2	5.81	422.8	8.61	406.2	5.81	253.95	231.9
X4045	0.05627	0.00109	0.56797	0.01058	0.07321	0.00074	0.02288	0.00025	462.1	42.53	456.7	6.85	455.5	4.46	457.3	4.92	455.5	4.46	644.52	593.32
X4049	0.05264	0.00117	0.26479	0.00569	0.03649	0.00038	0.01174	0.00014	313.1	49.63	238.5	4.57	231	2.35	235.9	2.85	231	2.35	867.18	1044.58
X4050	0.05594	0.0014	0.55934	0.01354	0.07252	0.00078	0.02351	0.00043	449.5	54.42	451.1	8.82	451.3	4.7	469.7	8.57	451.3	4.7	102.62	320.24
X4052	0.13872	0.00289	7.80159	0.15554	0.4079	0.00489	0.12928	0.00198	2211.2	35.64	2208.4	17.94	2205.3	22.4	2457.5	35.39	2211.2	35.64	56.04	62.21
X4053	0.05455	0.00114	0.4756	0.00963	0.06323	0.00065	0.02067	0.00034	394	46.04	395	6.63	395.2	3.93	413.6	6.65	395.2	3.93	170.74	596.87
X4054	0.06715	0.00152	1.26195	0.02756	0.13629	0.00147	0.0416	0.0007	842.5	46.38	828.8	12.37	823.6	8.33	823.7	13.54	823.6	8.33	90.92	213.32
X4055	0.05739	0.00127	0.50746	0.01089	0.06413	0.00067	0.02478	0.00065	506	48.55	416.7	7.34	400.7	4.06	494.7	12.87	400.7	4.06	78.45	887.26
X4057	0.0871	0.00109	2.84051	0.03359	0.23652	0.00227	0.07114	0.00073	1362.7	23.89	1366.3	8.88	1368.6	11.85	1389	13.83	1362.7	23.89	320.33	650.21
X4058	0.05736	0.00176	0.59959	0.01781	0.07581	0.00088	0.02165	0.00036	505	66.39	477	11.31	471.1	5.27	433	7.14	471.1	5.27	173.09	224.74
X4061	0.08379	0.00182	2.40837	0.05043	0.20845	0.00229	0.05702	0.00105	1287.7	41.85	1245.1	15.02	1220.5	12.23	1120.8	20.11	1287.7	41.85	68.23	167.06
X4062	0.05351	0.00132	0.37637	0.00899	0.05101	0.00054	0.01846	0.0003	350.5	54.86	324.4	6.64	320.7	3.33	369.8	5.95	320.7	3.33	193.83	522
X4063	0.05225	0.00212	0.30381	0.01203	0.04217	0.00054	0.01255	0.00021	296.5	90.08	269.4	9.37	266.3	3.32	252.1	4.18	266.3	3.32	274.84	225.79
X4064	0.05711	0.00152	0.60076	0.01552	0.07629	0.00084	0.02472	0.00035	495.2	58.24	477.7	9.84	474	5.03	493.6	6.89	474	5.03	274.39	336.78
X4065	0.05748	0.00149	0.60487	0.01523	0.07631	0.00083	0.02613	0.00039	509.8	56.5	480.3	9.63	474.1	4.99	521.3	7.74	474.1	4.99	228.16	377.78
X4066	0.06347	0.00241	1.00898	0.03723	0.11529	0.00151	0.03666	0.00051	724	78.55	708.4	18.82	703.4	8.74	727.7	9.91	703.4	8.74	176.44	83.52
X4067	0.05619	0.00162	0.59015	0.01649	0.07617	0.00086	0.02565	0.00041	459.2	63.14	471	10.53	473.2	5.12	512	7.98	473.2	5.12	138.16	214.42
X4068	0.0665	0.00188	1.14986	0.03153	0.1254	0.00146	0.03963	0.00056	822.2	58.05	777.2	14.89	761.6	8.35	785.6	10.96	761.6	8.35	200.99	180.85
X4069	0.05437	0.00156	0.41751	0.01161	0.05569	0.00062	0.01819	0.00027	386.3	62.84	354.3	8.32	349.4	3.8	364.3	5.41	349.4	3.8	297	389.17
X4070	0.05747	0.00232	0.45565	0.01791	0.05751	0.00075	0.03162	0.00186	509	86.22	381.2	12.49	360.4	4.57	629.2	36.48	360.4	4.57	7.54	150.17
X4072	0.06942	0.0011	1.45543	0.0221	0.15205	0.0015	0.05166	0.00096	911.2	32.36	912.1	9.14	912.5	8.4	1018.1	18.44	912.5	8.4	50.3	451.02
X4073	0.05607	0.00216	0.5655	0.02122	0.07315	0.00093	0.02567	0.00056	454.7	83.12	455.1	13.76	455.1	5.62	512.3	10.95	455.1	5.62	111.04	204.33
X4074	0.05804	0.00161	0.6618	0.0178	0.08269	0.00093	0.02758	0.00046	531	60.06	515.7	10.87	512.2	5.51	549.8	9.03	512.2	5.51	184.62	339.16
X4075	0.16144	0.00235	10.3895	0.1431	0.46673	0.00486	0.1331	0.00168	2470.8	24.32	2470.1	12.76	2469.2	21.36	2525.7	29.92	2470.8	24.32	65.01	91.81
X4077	0.0722	0.00134	1.62214	0.02899	0.16294	0.00167	0.0522	0.00093	991.5	37.41	978.8	11.23	973.1	9.27	1028.4	17.94	973.1	9.27	130.7	599.89
X4078	0.05196	0.00207	0.33388	0.01297	0.0466	0.00059	0.01489	0.00036	283.5	88.59	292.5	9.87	293.6	3.64	298.7	7.23	293.6	3.64	129.86	286.24
X4079	0.07255	0.0012	1.43665	0.02279	0.14362	0.00143	0.03655	0.00057	1001.4	33.34	904.3	9.5	865.1	8.07	725.6	11.08	865.1	8.07	136.08	482.55
X4080	0.16015	0.00208	9.72109	0.11886	0.44022	0.00438	0.1249	0.00151	2457.3	21.76	2408.7	11.26	2351.6	19.62	2378.8	27.09	2457.3	21.76	81.23	162.35
X4081	0.1174	0.00242	5.64491	0.11139	0.34871	0.004	0.09605	0.00254	1917	36.49	1923	17.02	1928.4	19.12	1853.7	46.79	1917	36.49	26.11	119.21
X4086	0.05813	0.00136	0.61488	0.01392	0.07672	0.00081	0.02656	0.00036	534.1	50.97	486.6	8.75	476.5	4.86	529.8	7.09	476.5	4.86	258.42	389.7
X4087	0.08397	0.00141	2.57575	0.04125	0.22246	0.00225	0.06761	0.00096	1291.8	32.3	1293.8	11.71	1294.9	11.89	1322.3	18.23	1291.8	32.3	73.19	194.38
X4089	0.05976	0.00106	0.56707	0.00963	0.06882	0.00068	0.02321	0.00028	594.5	38.16	456.1	6.24	429.1	4.12	463.8	5.5	429.1	4.12	362.45	699.37
X4091	0.05601	0.00098	0.52032	0.00869	0.06737	0.00066	0.02027	0.00026	452.6	37.95	425.4	5.81	420.3	4.01	405.7	5.19	420.3	4.01	408.8	1059.51
X4092	0.15268	0.002	8.58329	0.10587	0.4077	0.00405	0.11666	0.00137	2376.2	22.16	2294.8	11.22	2204.4	18.53	2230.2	24.76	2376.2	22.16	110.09	196.77
X4095	0.05627	0.0015	0.54321	0.01402	0.07001	0.00077	0.02507	0.00054	462.3	58.53	440.5	9.22	436.2	4.61	500.4	10.61	436.2	4.61	74.19	314.62
X4098	0.05289	0.00254	0.3157	0.01475	0.04329	0.00061	0.01449	0.00035	324.2	105.1	278.6	11.38	273.2	3.74	290.8	7	273.2	3.74	127.68	186.67
X4099	0.05134	0.002	0.25879	0.00984	0.03656	0.00045	0.01159	0.00016	256	87.23	233.7	7.93	231.5	2.81	232.9	3.19	231.5	2.81	539.35	298.87
X4101	0.05542	0.00097	0.47655	0.00801	0.06237	0.00061	0.02115	0.00025	428.8	38.12	395.7	5.51	390	3.72	423	4.89	390	3.72	526.14	1026.56
X4102	0.05605	0.00122	0.52901	0.01108	0.06845	0.0007	0.02155	0.00027	453.9	47.31	431.2	7.36	426.8	4.25	431	5.32	426.8	4.25	387.53	504.73
X4103	0.05803	0.00263	0.54303	0.02393	0.06786	0.00095	0.02115	0.00055	530.5	96.71	440.4	15.75	423.3	5.74	423	10.94	423.3	5.74	117.15	206.47
X4104	0.08649	0.0028	2.73359	0.08533	0.22921	0.00305	0.06379	0.00122	1349.2	61.09	1337.6	23.21	1330.4	16	1250	23.11	1349.2	61.09	136.47	136.5
X4105	0.05003	0.00235	0.24514	0.01123	0.03553	0.00048	0.01166	0.00032	196.5	105.62	222.6	9.16	225.1	3.01	234.4	6.41	225.1	3.01	140.53	310.02
X4106	0.06017	0.00189	0.56438	0.01713	0.06802	0.0008	0.02108	0.00059	609.8	66.32	454.4	11.12	424.2	4.81	421.6	11.77	424.2	4.81	56.94	246.8
XSG_46.4 Ma
X9001	0.05294	0.00199	0.31537	0.01154	0.04319	0.00054	0.01535	0.00034	326.3	83.01	278.3	8.91	272.6	3.34	308	6.82	272.6	3.34	143.06	316.43
X9002	0.0697	0.0025	1.25591	0.04378	0.13066	0.00173	0.04267	0.00106	919.6	72.14	826.1	19.71	791.6	9.88	844.5	20.52	791.6	9.88	92.32	196.74
X9003	0.05797	0.0012	0.62654	0.01258	0.07837	0.00082	0.0248	0.00032	528.4	45.11	493.9	7.85	486.4	4.89	495.1	6.25	486.4	4.89	403.95	577.94
X9004	0.06671	0.00129	1.19063	0.02232	0.12942	0.00135	0.0419	0.00063	828.9	39.91	796.3	10.35	784.5	7.72	829.6	12.3	784.5	7.72	202.02	541.45
X9005	0.05563	0.00145	0.55291	0.01402	0.07207	0.0008	0.01342	0.00532	437.3	56.73	446.9	9.17	448.6	4.79	273	109.05	448.6	4.79	7.34	767.93
X9006	0.10373	0.00295	4.26756	0.11741	0.29833	0.00395	0.08676	0.00205	1692	51.62	1687.1	22.63	1683	19.6	1681.7	38.08	1692	51.62	34.18	62.85
X9007	0.05676	0.00151	0.60829	0.01571	0.07771	0.00087	0.02345	0.00037	481.7	57.69	482.5	9.92	482.4	5.18	468.5	7.29	482.4	5.18	230.92	352.46
X9008	0.05728	0.00124	0.60003	0.01264	0.07597	0.0008	0.02405	0.0003	501.8	47.59	477.3	8.02	472	4.8	480.4	5.89	472	4.8	598.43	683.62
X9011	0.05816	0.00135	0.53343	0.01199	0.06651	0.00071	0.02147	0.0003	535.4	50.48	434.1	7.94	415.1	4.31	429.4	5.87	415.1	4.31	411.41	601.34
X9012	0.05837	0.00155	0.61454	0.01586	0.07636	0.00085	0.02718	0.00041	543.6	57.04	486.4	9.97	474.3	5.11	542.1	8.15	474.3	5.11	228.87	361.32
X9014	0.05674	0.00175	0.61462	0.0184	0.07856	0.00092	0.02553	0.00045	480.7	67.28	486.5	11.57	487.5	5.51	509.5	8.91	487.5	5.51	185.75	302.27
X9015	0.07088	0.00123	1.55619	0.02602	0.15923	0.00163	0.05066	0.00084	953.9	35.06	953	10.34	952.5	9.07	998.8	16.17	952.5	9.07	113.83	509.22
X9016	0.12145	0.00412	5.82529	0.19071	0.34785	0.00542	0.10895	0.00181	1977.6	59.26	1950.2	28.37	1924.3	25.9	2090.3	32.99	1977.6	59.26	159.11	75.74
X9018	0.07589	0.00148	1.91502	0.03611	0.18302	0.00194	0.0566	0.00062	1092.1	38.62	1086.3	12.58	1083.4	10.59	1112.8	11.93	1092.1	38.62	579.91	369.79
X9019	0.07686	0.00233	2.0072	0.05892	0.18939	0.00238	0.05915	0.00121	1117.6	59.27	1117.9	19.89	1118.1	12.88	1161.6	23.11	1117.6	59.27	53.05	90.32
X9020	0.06782	0.00142	1.30721	0.02649	0.1398	0.00149	0.04693	0.00084	863	42.87	848.9	11.66	843.5	8.43	926.9	16.17	843.5	8.43	80.96	285.75
X9022	0.10468	0.00158	4.40707	0.06388	0.30535	0.00313	0.09495	0.00123	1708.6	27.56	1713.7	12	1717.8	15.46	1833.4	22.8	1708.6	27.56	93.11	199.05
X9023	0.05395	0.00182	0.46565	0.01534	0.0626	0.00075	0.01894	0.00044	368.8	74.25	388.2	10.63	391.4	4.56	379.3	8.72	391.4	4.56	105.91	263.59
X9024	0.05675	0.00167	0.5819	0.01663	0.07437	0.00086	0.02704	0.00048	481.2	64.36	465.7	10.68	462.4	5.14	539.3	9.53	462.4	5.14	155.15	323.75
X9025	0.0718	0.00124	1.61563	0.02686	0.16321	0.00167	0.04702	0.00061	980.1	34.75	976.3	10.43	974.6	9.25	928.8	11.75	974.6	9.25	230.76	431.83
X9026	0.08217	0.00206	2.42396	0.05889	0.21395	0.00251	0.06613	0.00112	1249.6	48.31	1249.7	17.46	1249.8	13.33	1294.3	21.22	1249.6	48.31	82.58	123.23
X9027	0.10931	0.00163	4.76483	0.0681	0.31615	0.00324	0.09594	0.00178	1787.9	26.98	1778.7	11.99	1770.9	15.87	1851.6	32.92	1787.9	26.98	134.09	828.52
X9030	0.0677	0.00234	1.34717	0.04526	0.14432	0.00187	0.04793	0.00106	859.4	70.21	866.3	19.58	869.1	10.53	946.2	20.5	869.1	10.53	63.72	118.66
X9031	0.05566	0.00244	0.46743	0.01992	0.06091	0.00084	0.02071	0.00045	438.7	94.35	389.4	13.78	381.1	5.1	414.4	8.91	381.1	5.1	262.95	355.32
X9032	0.05771	0.00236	0.59453	0.02362	0.07471	0.001	0.02436	0.0006	518.7	87.41	473.8	15.04	464.5	6	486.4	11.92	464.5	6	80.77	159.02
X9033	0.05894	0.00216	0.70002	0.02493	0.08615	0.0011	0.02876	0.00066	564.7	77.82	538.8	14.89	532.7	6.53	573	13.04	532.7	6.53	267.27	564.66
X9034	0.07033	0.00203	1.49763	0.04184	0.15444	0.00185	0.04493	0.00086	938.1	57.99	929.4	17.01	925.8	10.33	888.3	16.68	925.8	10.33	78.33	131.86
X9035	0.27167	0.00312	25.1484	0.27496	0.6714	0.00671	0.1845	0.00229	3315.7	17.91	3314	10.68	3311.3	25.88	3422.4	39.08	3315.7	17.91	112.92	315.6
X9036	0.09981	0.00149	3.97733	0.05694	0.28903	0.00294	0.08953	0.00087	1620.5	27.56	1629.6	11.62	1636.7	14.7	1733.2	16.14	1620.5	27.56	618.09	289.2
X9037	0.05152	0.00344	0.26743	0.01744	0.03765	0.00065	0.01172	0.00033	264	146.34	240.6	13.97	238.3	4.02	235.4	6.65	238.3	4.02	92.91	98.37
X9038	0.05585	0.00212	0.59404	0.02197	0.07715	0.00099	0.02375	0.00059	445.9	82.23	473.4	13.99	479.1	5.91	474.4	11.67	479.1	5.91	62.38	141.96
X9039	0.08812	0.00187	2.88008	0.05905	0.23704	0.00264	0.07352	0.00105	1385.2	40.22	1376.7	15.45	1371.3	13.76	1433.9	19.86	1385.2	40.22	107.62	138.68
X9040	0.053	0.00267	0.27879	0.01369	0.03815	0.00055	0.0129	0.00032	328.6	110.05	249.7	10.87	241.4	3.42	259.1	6.33	241.4	3.42	121.98	176.01
X9043	0.05655	0.00169	0.52539	0.01523	0.06739	0.00078	0.0212	0.00043	473.3	64.8	428.7	10.14	420.4	4.7	423.9	8.59	420.4	4.7	156.91	385.1
X9044	0.0831	0.00138	2.45426	0.03922	0.21421	0.0022	0.07262	0.00087	1271.6	32.03	1258.7	11.53	1251.2	11.67	1416.9	16.35	1271.6	32.03	265.88	415.74
X9045	0.05166	0.00167	0.31074	0.00977	0.04363	0.00051	0.01428	0.00025	270.3	72.33	274.8	7.57	275.3	3.14	286.6	5.08	275.3	3.14	219.97	376.65
X9046	0.06637	0.00137	1.17551	0.02349	0.12847	0.00136	0.03681	0.0008	818	42.64	789.2	10.96	779.1	7.76	730.6	15.53	779.1	7.76	63.61	337.47
X9047	0.15197	0.00231	8.99298	0.1306	0.42922	0.00457	0.12604	0.00139	2368.2	25.72	2337.3	13.27	2302.2	20.62	2399.4	25.04	2368.2	25.72	224.54	159.36
X9048	0.0528	0.00191	0.3597	0.01269	0.04941	0.00061	0.01576	0.00029	320.1	80.04	312	9.48	310.9	3.73	316	5.79	310.9	3.73	211.6	292.87
X9049	0.05563	0.00278	0.31526	0.01534	0.04111	0.0006	0.01347	0.00034	437.2	107.82	278.2	11.84	259.7	3.74	270.5	6.74	259.7	3.74	124.11	177.48
X9050	0.14594	0.00321	8.5954	0.18154	0.4272	0.00539	0.13036	0.00252	2298.8	37.32	2296.1	19.21	2293.1	24.33	2476.8	45.08	2298.8	37.32	44.94	72.58
X9051	0.05855	0.00168	0.681	0.01895	0.08437	0.00097	0.02853	0.0005	550.2	61.39	527.4	11.45	522.2	5.76	568.5	9.79	522.2	5.76	249.74	466.7
X9052	0.05567	0.00126	0.6174	0.0136	0.08044	0.00085	0.02499	0.00032	438.8	49.46	488.2	8.54	498.8	5.08	498.8	6.31	498.8	5.08	378.07	466.51
X9053	0.08945	0.00241	3.02941	0.07871	0.24563	0.00304	0.07268	0.00148	1413.8	50.57	1415.1	19.84	1415.9	15.71	1418.1	27.85	1413.8	50.57	76.19	136.95
X9054	0.13264	0.00277	7.17461	0.14402	0.39233	0.00471	0.06339	0.00164	2133.3	36.13	2133.4	17.89	2133.6	21.79	1242.4	31.16	2133.3	36.13	58.99	133.34
X9055	0.05714	0.00116	0.58772	0.01155	0.07461	0.00077	0.02299	0.00026	496.3	44.06	469.4	7.39	463.8	4.62	459.4	5.18	463.8	4.62	642.53	638.83
X9057	0.07025	0.00195	1.49612	0.0403	0.15448	0.00182	0.04279	0.0008	935.6	56.03	928.8	16.39	926	10.18	846.9	15.53	926	10.18	76.61	125.66
X9058	0.05551	0.00142	0.53346	0.01325	0.0697	0.00076	0.02273	0.00035	432.7	55.67	434.1	8.77	434.3	4.58	454.2	6.98	434.3	4.58	172.63	320.59
X9059	0.07413	0.00124	1.75405	0.02823	0.17163	0.00174	0.05009	0.00166	1044.9	33.43	1028.7	10.41	1021.1	9.58	987.9	31.99	1044.9	33.43	30.22	668.2
X9060	0.05251	0.00263	0.3979	0.01941	0.05497	0.0008	0.01767	0.00044	307.6	109.91	340.1	14.1	344.9	4.88	354.1	8.83	344.9	4.88	73.18	108.4
X9061	0.05291	0.00239	0.27033	0.0119	0.03706	0.00051	0.01266	0.00034	325	99.31	243	9.51	234.6	3.15	254.2	6.75	234.6	3.15	107.73	244.11
X9062	0.05961	0.00172	0.55695	0.01554	0.06777	0.00078	0.01723	0.00033	589.4	61.23	449.5	10.14	422.7	4.7	345.2	6.56	422.7	4.7	239.98	427.45
X9063	0.05153	0.00275	0.2811	0.01465	0.03957	0.0006	0.01332	0.00031	264.7	118.11	251.5	11.61	250.1	3.7	267.5	6.14	250.1	3.7	199.33	225.34
X9064	0.07269	0.0016	1.61115	0.03424	0.16077	0.00175	0.05235	0.00082	1005.3	44.05	974.6	13.31	961.1	9.72	1031.4	15.69	961.1	9.72	118.32	234.65
X9065	0.06856	0.00105	1.37185	0.02004	0.14514	0.00144	0.04424	0.0005	885.4	31.2	877	8.58	873.7	8.08	875	9.72	873.7	8.08	317.68	606.02
X9066	0.07437	0.00329	1.75575	0.07539	0.17123	0.00262	0.04908	0.00172	1051.6	86.66	1029.3	27.78	1018.9	14.42	968.4	33.11	1051.6	86.66	15.94	37.37
X9067	0.05864	0.00221	0.59751	0.02188	0.07391	0.00095	0.02214	0.0004	553.6	80.17	475.7	13.91	459.7	5.72	442.7	7.86	459.7	5.72	175.86	174.75
X9068	0.08398	0.00205	2.54498	0.05985	0.21981	0.00256	0.06411	0.00097	1292	46.76	1285	17.14	1280.9	13.51	1255.9	18.44	1292	46.76	168.58	186.53
X9069	0.06538	0.00144	1.14683	0.02434	0.12723	0.00136	0.03859	0.00066	786.5	45.46	775.7	11.51	772.1	7.78	765.3	12.9	772.1	7.78	94.96	261.38
X9070	0.12271	0.00151	6.12979	0.07155	0.36233	0.00354	0.09785	0.0012	1996	21.69	1994.5	10.19	1993.2	16.77	1886.9	22.13	1996	21.69	119.88	409.83
X9071	0.0514	0.00137	0.29754	0.00768	0.04199	0.00046	0.01298	0.00017	258.7	59.9	264.5	6.01	265.1	2.83	260.6	3.46	265.1	2.83	525.71	570.45
X9072	0.05253	0.00374	0.27979	0.01942	0.03863	0.00072	0.01071	0.00059	308.5	153.7	250.5	15.41	244.4	4.45	215.3	11.88	244.4	4.45	104.97	341.6
X9073	0.07092	0.00142	1.55528	0.0299	0.15905	0.00166	0.04418	0.00078	955.2	40.32	952.6	11.88	951.5	9.25	873.8	15.16	951.5	9.25	97.09	323.33
X9074	0.05922	0.00178	0.61432	0.01789	0.07524	0.00087	0.02407	0.00039	575.3	63.93	486.3	11.25	467.6	5.21	480.8	7.69	467.6	5.21	196.77	266.37
X9075	0.06649	0.00148	1.18768	0.02558	0.12955	0.00139	0.04081	0.0006	821.9	45.92	794.9	11.87	785.3	7.91	808.5	11.7	785.3	7.91	215.75	388.9
X9077	0.05544	0.00293	0.29992	0.01541	0.03923	0.0006	0.01295	0.00035	429.9	113.81	266.3	12.04	248.1	3.69	260	6.91	248.1	3.69	209.08	313.17
X9078	0.05743	0.00175	0.52036	0.01536	0.06572	0.00076	0.02145	0.00035	507.7	65.95	425.4	10.26	410.3	4.6	429	7.02	410.3	4.6	654.5	950.06
X9079	0.14661	0.00243	8.70047	0.13756	0.43042	0.00468	0.11809	0.00172	2306.8	28.2	2307.1	14.4	2307.6	21.1	2256	31.15	2306.8	28.2	80.24	126.02
X9080	0.05712	0.00144	0.54445	0.01327	0.06913	0.00075	0.02266	0.00053	495.5	55.07	441.4	8.72	430.9	4.51	452.9	10.46	430.9	4.51	93.24	501.65
X9081	0.16111	0.0019	10.237	0.11351	0.46086	0.00447	0.1316	0.00332	2467.4	19.76	2456.4	10.26	2443.3	19.72	2498.9	59.3	2467.4	19.76	27.41	799.61
X9082	0.11352	0.00179	5.21	0.07839	0.33287	0.00344	0.09455	0.00145	1856.5	28.26	1854.3	12.82	1852.3	16.63	1826	26.78	1856.5	28.26	52.16	148.38
X9083	0.05941	0.00208	0.55412	0.01883	0.06765	0.00084	0.02162	0.00042	582.2	74.24	447.7	12.3	422	5.05	432.3	8.25	422	5.05	224.92	339.27
X9084	0.06629	0.00175	0.98741	0.02518	0.10803	0.00122	0.03478	0.00051	815.6	54.16	697.4	12.86	661.3	7.08	691	10.04	661.3	7.08	167.92	211.61
X9085	0.07016	0.00124	1.38269	0.0234	0.14294	0.00145	0.04164	0.00068	933.1	35.78	881.6	9.97	861.2	8.15	824.5	13.25	861.2	8.15	104.24	426.38
X9086	0.05713	0.00158	0.59686	0.01601	0.07577	0.00085	0.02327	0.0004	496	60.37	475.2	10.18	470.9	5.07	465	7.93	470.9	5.07	142.62	275.93
X9087	0.05415	0.00106	0.46248	0.00871	0.06195	0.00062	0.01948	0.00027	377.1	43.3	386	6.04	387.5	3.79	389.9	5.39	387.5	3.79	253.7	685.94
X9088	0.05698	0.0041	0.5314	0.03729	0.06764	0.00127	0.02055	0.00081	490.1	151.81	432.7	24.73	421.9	7.69	411.1	16.01	421.9	7.69	40.69	66.91
X9090	0.0563	0.00121	0.55748	0.01161	0.07181	0.00074	0.02294	0.00029	463.6	47.43	449.9	7.57	447.1	4.47	458.4	5.72	447.1	4.47	331.71	473.32
X9091	0.07115	0.00146	1.5104	0.02981	0.15396	0.00162	0.04628	0.00066	961.8	41.32	934.6	12.06	923.1	9.06	914.5	12.8	923.1	9.06	194.61	356.64
X9092	0.07108	0.00149	1.18466	0.02395	0.12088	0.00128	0.03637	0.00052	959.7	42.34	793.5	11.13	735.6	7.35	722	10.18	735.6	7.35	471.18	823.54
X9093	0.05613	0.00281	0.33266	0.0162	0.04299	0.00063	0.01433	0.00033	457.1	107.65	291.6	12.34	271.3	3.91	287.6	6.55	271.3	3.91	328.69	388.6
X9094	0.088	0.00358	2.73811	0.10775	0.22568	0.00348	0.07288	0.00182	1382.4	76.09	1338.9	29.27	1311.8	18.32	1421.8	34.21	1382.4	76.09	33.48	44.32
X9095	0.06642	0.00144	1.09968	0.02303	0.12009	0.00127	0.03375	0.00048	819.5	44.72	753.2	11.14	731.1	7.33	670.9	9.38	731.1	7.33	267.64	415.72
X9096	0.05788	0.00202	0.5624	0.01908	0.07048	0.00086	0.02139	0.00034	524.9	75.03	453.1	12.4	439	5.2	427.7	6.81	439	5.2	194.73	182.82
X9097	0.06502	0.0022	1.09273	0.0359	0.12189	0.00152	0.03762	0.00078	775.1	69.66	749.8	17.42	741.4	8.75	746.4	15.28	741.4	8.75	49.37	84.57
X9098	0.05385	0.00185	0.273	0.00913	0.03677	0.00044	0.0131	0.00023	364.8	75.58	245.1	7.28	232.8	2.73	263	4.64	232.8	2.73	411.83	647.95
X9100	0.05666	0.0016	0.46059	0.01259	0.05896	0.00066	0.01696	0.0005	477.7	61.22	384.7	8.75	369.3	4.02	340	9.9	369.3	4.02	133.3	794.8
X9101	0.05679	0.0011	0.57306	0.01073	0.07319	0.00074	0.02347	0.00038	482.7	42.74	460	6.93	455.3	4.45	468.8	7.53	455.3	4.45	142.08	588.27
X9104	0.05643	0.00112	0.59724	0.0114	0.07676	0.00078	0.02383	0.00029	468.5	43.63	475.5	7.25	476.8	4.67	476.1	5.66	476.8	4.67	347.65	504.67
X9105	0.05736	0.00112	0.57191	0.01074	0.07231	0.00073	0.0222	0.00038	505.1	42.75	459.2	6.94	450	4.4	443.9	7.51	450	4.4	123.99	550.25
X9106	0.05781	0.0011	0.58424	0.01069	0.0733	0.00074	0.02226	0.00025	522.3	41.33	467.2	6.85	456	4.44	445	4.96	456	4.44	554.39	653.52
X9107	0.05852	0.00154	0.58337	0.01489	0.07231	0.0008	0.02255	0.00036	549.1	56.52	466.6	9.55	450	4.79	450.7	7.18	450	4.79	244.95	431.87
X9108	0.05549	0.00142	0.50444	0.01255	0.06593	0.00071	0.02017	0.00032	431.8	55.84	414.7	8.47	411.6	4.32	403.6	6.43	411.6	4.32	172.1	331.64
X9109	0.06326	0.002	0.9635	0.02958	0.11047	0.00133	0.04241	0.00108	716.9	65.81	685.1	15.3	675.5	7.72	839.6	20.99	675.5	7.72	36.27	145.35
X9110	0.05363	0.00183	0.39634	0.01313	0.0536	0.00064	0.0166	0.00045	355.6	74.92	339	9.55	336.6	3.9	332.8	8.95	336.6	3.9	62.93	213.7
X9111	0.07352	0.00207	1.62896	0.04433	0.16069	0.00191	0.05772	0.00128	1028.4	55.9	981.5	17.12	960.6	10.61	1134.2	24.43	960.6	10.61	70.08	210.02
X9112	0.07201	0.00128	1.60478	0.02745	0.16164	0.00164	0.04997	0.00098	986.1	35.86	972.1	10.7	965.9	9.12	985.6	18.96	965.9	9.12	50.37	328.3
X9113	0.12286	0.00227	5.89086	0.10395	0.34775	0.00384	0.09963	0.00104	1998.2	32.45	1959.9	15.32	1923.9	18.37	1919.7	19.09	1998.2	32.45	248.33	91.18
X9115	0.06719	0.00204	1.08097	0.03179	0.11668	0.0014	0.03691	0.00047	843.8	61.95	744.1	15.51	711.4	8.07	732.6	9.15	711.4	8.07	249.46	134.06
X9116	0.05448	0.00163	0.45055	0.0131	0.05998	0.00068	0.01815	0.00027	391	65.49	377.7	9.17	375.5	4.13	363.5	5.27	375.5	4.13	238.84	254.27
X9117	0.06535	0.00172	1.1035	0.02808	0.12247	0.00138	0.03427	0.0006	785.6	54.29	755	13.56	744.8	7.93	681	11.79	744.8	7.93	114.13	205.3
X9118	0.05043	0.00258	0.30418	0.01523	0.04375	0.00062	0.01321	0.00038	214.9	114.48	269.7	11.86	276	3.84	265.2	7.51	276	3.84	61.24	121.72
X9119	0.05493	0.00175	0.45402	0.01402	0.05994	0.0007	0.0196	0.00037	409.4	68.91	380.1	9.79	375.3	4.24	392.4	7.29	375.3	4.24	124.31	235.74
X9120	0.17248	0.00214	11.659	0.13618	0.49026	0.00485	0.13945	0.00167	2581.8	20.53	2577.4	10.92	2571.8	20.97	2638.6	29.58	2581.8	20.53	70.91	171.5
X9121	0.05542	0.00157	0.48137	0.01325	0.06299	0.00071	0.01858	0.00028	429.1	61.66	399	9.08	393.8	4.28	372.2	5.51	393.8	4.28	341.89	412.18
X9122	0.06862	0.00124	1.41454	0.02464	0.14951	0.00152	0.04462	0.00074	887.2	37.02	895.1	10.36	898.2	8.52	882.4	14.39	898.2	8.52	65.1	267.44
X9123	0.07132	0.00147	1.41927	0.02808	0.14433	0.00152	0.04582	0.0008	966.5	41.4	897.1	11.78	869.1	8.56	905.6	15.5	869.1	8.56	76.9	257.77
X9124	0.05731	0.0013	0.59105	0.013	0.0748	0.00079	0.02288	0.00032	502.8	49.77	471.5	8.3	465	4.72	457.3	6.34	465	4.72	245.57	405.5
X9126	0.05606	0.00133	0.57285	0.01313	0.07411	0.00079	0.02299	0.00033	454.3	51.62	459.9	8.48	460.9	4.71	459.5	6.55	460.9	4.71	188.71	322.06
X9127	0.06604	0.00224	0.99235	0.03266	0.10898	0.00137	0.03284	0.00049	807.6	69.48	699.9	16.64	666.8	7.96	653.1	9.55	666.8	7.96	307.45	207.37
X9128	0.0668	0.00246	1.24791	0.04461	0.13548	0.00179	0.04339	0.00084	831.7	74.94	822.5	20.15	819	10.14	858.6	16.3	819	10.14	48.93	59.56
X9129	0.05574	0.00295	0.52558	0.02712	0.06839	0.00104	0.02112	0.00044	441.6	113.92	428.9	18.05	426.5	6.29	422.5	8.72	426.5	6.29	119.12	93.52
X9130	0.05323	0.00132	0.31525	0.00758	0.04295	0.00046	0.0137	0.00017	338.6	55.24	278.2	5.85	271.1	2.83	275.1	3.36	271.1	2.83	758.74	746.6
X9131	0.07033	0.00168	1.26405	0.02908	0.13035	0.00143	0.03974	0.00071	938.1	48.14	829.7	13.04	789.9	8.18	787.6	13.79	789.9	8.18	169.33	402.28
X9132	0.0657	0.00264	0.94449	0.03687	0.10426	0.00143	0.03429	0.00067	797	82.14	675.2	19.25	639.3	8.36	681.4	13.18	639.3	8.36	168.07	181.38
X9133	0.05671	0.00165	0.67041	0.01894	0.08574	0.00097	0.03333	0.00176	479.5	63.75	521	11.52	530.3	5.78	662.7	34.5	530.3	5.78	6.55	172.04
X9134	0.05638	0.00211	0.49896	0.0182	0.06419	0.00081	0.02102	0.00038	466.4	81.76	411	12.33	401.1	4.91	420.4	7.61	401.1	4.91	322.47	393.27
X9135	0.05566	0.00165	0.46808	0.01346	0.06099	0.00069	0.02003	0.00034	438.7	64.45	389.9	9.31	381.6	4.22	400.9	6.83	381.6	4.22	167.29	299.58
X9136	0.10053	0.00193	3.92461	0.07216	0.28313	0.00307	0.0883	0.00122	1633.9	35.22	1618.8	14.88	1607.1	15.44	1710.3	22.67	1633.9	35.22	127.81	180.19
X9137	0.05573	0.00196	0.49303	0.01686	0.06416	0.00078	0.01921	0.00038	441.4	76.39	407	11.46	400.9	4.73	384.6	7.56	400.9	4.73	110.03	179.79
X9139	0.05804	0.0015	0.60767	0.01516	0.07593	0.00083	0.02261	0.00035	531	55.89	482.1	9.58	471.8	4.97	451.9	7.01	471.8	4.97	210.99	349.74
X9141	0.06913	0.00119	1.10603	0.01828	0.11603	0.00116	0.04322	0.00083	902.7	35.15	756.3	8.81	707.7	6.73	855.2	16.04	707.7	6.73	90.11	752.78
X9142	0.13387	0.0024	7.20257	0.12327	0.39021	0.00432	0.11506	0.00141	2149.3	30.96	2136.8	15.26	2123.8	20.04	2201.2	25.53	2149.3	30.96	208.22	165.23
X9144	0.05771	0.00109	0.60971	0.01112	0.07663	0.00077	0.02365	0.0003	518.4	41.28	483.4	7.01	476	4.62	472.5	5.89	476	4.62	304.89	572.75
X9145	0.05667	0.00143	0.60489	0.01475	0.07741	0.00084	0.02271	0.00033	478.1	54.91	480.3	9.33	480.6	5.01	453.9	6.53	480.6	5.01	177.19	252.7
X9146	0.05677	0.00131	0.56792	0.01264	0.07255	0.00076	0.02325	0.00032	481.9	50.25	456.7	8.18	451.5	4.6	464.5	6.31	451.5	4.6	265.71	421.46
X9148	0.05868	0.00163	0.66059	0.01781	0.08165	0.00092	0.02761	0.00043	555.1	59.56	515	10.89	506	5.48	550.6	8.44	506	5.48	229.59	346.64
X9150	0.09545	0.0019	3.5027	0.06692	0.26615	0.00291	0.07924	0.001	1536.9	37	1527.8	15.09	1521.2	14.79	1541.4	18.72	1536.9	37	206.56	193.78
XSG_47.4 Ma
X5001	0.06568	0.00184	1.19221	0.03232	0.13186	0.00152	0.04149	0.00167	796.3	57.65	797	14.97	798.5	8.65	821.7	32.48	798.5	8.65	34.28	383.13
X5002	0.05471	0.00195	0.5181	0.01798	0.06879	0.00084	0.02197	0.00042	400.1	77.78	423.9	12.03	428.9	5.06	439.3	8.32	428.9	5.06	258.17	383.24
X5003	0.07186	0.00404	1.34919	0.07365	0.13639	0.00243	0.05665	0.00205	982.1	110.55	867.2	31.83	824.2	13.79	1113.8	39.22	824.2	13.79	74.47	172.65
X5004	0.16529	0.0042	10.5829	0.25757	0.46513	0.00658	0.12762	0.00251	2510.5	42.07	2487.2	22.58	2462.2	28.97	2427.6	45.04	2510.5	42.07	64.77	61.18
X5005	0.06873	0.00238	1.44103	0.04844	0.15231	0.00195	0.04525	0.00101	890.6	69.94	906.1	20.15	913.9	10.91	894.5	19.56	913.9	10.91	96.48	168.27
X5006	0.05532	0.00265	0.53448	0.02493	0.07019	0.001	0.02124	0.00053	425.1	102.97	434.8	16.5	437.3	6.02	424.8	10.48	437.3	6.02	272.96	395.75
X5007	0.05526	0.00255	0.48223	0.02167	0.06339	0.00089	0.02072	0.00054	422.7	99.73	399.6	14.84	396.2	5.38	414.6	10.72	396.2	5.38	188.87	349.67
X5008	0.05573	0.00172	0.52825	0.0158	0.06886	0.0008	0.03443	0.00868	441.2	66.98	430.6	10.5	429.3	4.8	684.2	169.61	429.3	4.8	3.13	543.81
X5009	0.06891	0.00244	1.3688	0.04707	0.1443	0.00188	0.04488	0.00108	895.9	71.48	875.6	20.18	868.9	10.61	887.3	20.99	868.9	10.61	76.29	155.35
X5010	0.07101	0.00178	1.54897	0.03749	0.15844	0.00179	0.04635	0.00109	957.8	50.36	950.1	14.94	948.1	9.97	915.7	21.14	948.1	9.97	109.18	401.03
X5011	0.06958	0.0017	1.43815	0.03391	0.15014	0.00167	0.04281	0.00083	916	49.38	904.9	14.12	901.8	9.38	847.3	16	901.8	9.38	152.32	366.54
X5012	0.09035	0.00199	3.08979	0.06556	0.24841	0.0028	0.07421	0.00125	1432.8	41.45	1430.2	16.28	1430.3	14.48	1446.9	23.49	1432.8	41.45	112.8	191.72
X5013	0.11186	0.00292	5.063	0.12721	0.32876	0.00422	0.09166	0.00124	1829.8	46.52	1829.9	21.3	1832.4	20.49	1772.6	22.9	1829.8	46.52	203.13	84.69
X5014	0.05476	0.00201	0.57738	0.02067	0.07658	0.00096	0.02242	0.00053	402.5	79.55	462.8	13.31	475.7	5.72	448.1	10.49	475.7	5.72	179.19	346.56
X5015	0.0513	0.00265	0.32097	0.01617	0.04545	0.00066	0.01515	0.00034	254.1	114.31	282.6	12.43	286.5	4.06	304	6.76	286.5	4.06	275.04	309.12
X5016	0.07934	0.00399	2.1774	0.10641	0.19933	0.00338	0.05781	0.00298	1180.6	96.11	1173.8	34	1171.7	18.17	1135.9	56.93	1180.6	96.11	15.49	54.35
X5017	0.06948	0.0027	1.45611	0.05493	0.15222	0.00209	0.04495	0.00111	912.9	77.89	912.4	22.71	913.4	11.71	888.7	21.5	913.4	11.71	80.63	138.37
X5018	0.07001	0.00183	1.48777	0.03763	0.15434	0.00178	0.04746	0.00089	928.6	52.68	925.4	15.36	925.3	9.94	937.2	17.19	925.3	9.94	136.4	275.38
X5019	0.05519	0.00184	0.49619	0.01609	0.06529	0.00078	0.01865	0.00031	419.8	72.18	409.1	10.92	407.7	4.73	373.6	6.09	407.7	4.73	495.83	505.48
X5020	0.07707	0.00137	1.9879	0.03407	0.18731	0.00195	0.0517	0.00099	1123.1	35	1111.4	11.58	1106.8	10.59	1018.8	19.05	1123.1	35	172.45	815.11
X5021	0.07005	0.00198	1.48421	0.04079	0.15388	0.00183	0.0557	0.00127	929.7	57.44	924	16.67	922.7	10.23	1095.6	24.26	922.7	10.23	77.18	256.63
X5022	0.04999	0.00293	0.27823	0.01598	0.04042	0.00062	0.01259	0.00034	194.7	130.92	249.3	12.7	255.4	3.84	252.9	6.78	255.4	3.84	201.52	284.94
X5023	0.06985	0.00244	1.48005	0.05018	0.15388	0.00202	0.04969	0.00086	923.8	70.07	922.2	20.55	922.7	11.27	980.1	16.54	922.7	11.27	199.02	177.59
X5024	0.05582	0.00262	0.56157	0.02577	0.07305	0.00104	0.02493	0.00059	445	101.51	452.6	16.75	454.5	6.22	497.8	11.58	454.5	6.22	153.92	232.84
X5025	0.07039	0.00252	1.52654	0.05304	0.15747	0.00211	0.05075	0.00143	939.7	71.59	941.1	21.32	942.7	11.73	1000.5	27.45	942.7	11.73	50.08	143.67
X5026	0.07103	0.00184	1.55996	0.03917	0.15946	0.00185	0.04878	0.00095	958.3	51.97	954.5	15.54	953.8	10.31	962.7	18.4	953.8	10.31	207.17	479.01
X5027	0.06981	0.00225	1.45217	0.04546	0.15104	0.00191	0.04665	0.00092	922.8	64.84	910.8	18.82	906.8	10.72	921.6	17.68	906.8	10.72	134.38	197.82
X5028	0.09098	0.00239	3.17117	0.08085	0.25308	0.00313	0.07646	0.00201	1446	49.41	1450.2	19.68	1454.3	16.12	1489.2	37.72	1446	49.41	43.72	140.81
X5029	0.06836	0.00214	1.4549	0.04432	0.15453	0.00193	0.04975	0.0011	879.4	63.45	911.9	18.33	926.3	10.75	981.4	21.19	926.3	10.75	96.12	214.02
X5031	0.06971	0.00159	1.49376	0.03311	0.15557	0.00173	0.04761	0.00106	919.7	46.16	927.8	13.48	932.1	9.67	940.1	20.49	932.1	9.67	95.01	431.38
X5032	0.0999	0.00305	3.97679	0.11745	0.28898	0.00397	0.09374	0.00192	1622.3	55.67	1629.5	23.96	1636.4	19.85	1811	35.53	1622.3	55.67	79.61	104.42
X5033	0.07013	0.00194	1.5461	0.04152	0.16004	0.00191	0.05356	0.0012	932.2	55.56	948.9	16.56	957	10.63	1054.5	22.95	957	10.63	95.96	276.16
X5034	0.07122	0.00191	1.53007	0.03998	0.15595	0.00185	0.04722	0.00099	963.7	53.9	942.5	16.04	934.3	10.31	932.7	19.04	934.3	10.31	141.8	349.52
X5035	0.06958	0.00199	1.50372	0.04195	0.15687	0.00191	0.04954	0.00123	916	57.88	931.9	17.01	939.3	10.63	977.2	23.66	939.3	10.63	81.28	279.68
X5037	0.05554	0.0032	0.37116	0.02091	0.0485	0.00077	0.01402	0.00071	433.8	123.76	320.5	15.49	305.3	4.75	281.4	14.18	305.3	4.75	93.51	324.46
X5038	0.10677	0.00291	4.24112	0.11195	0.28826	0.00379	0.08762	0.00172	1745.1	49.06	1682	21.69	1632.8	18.96	1697.6	31.9	1745.1	49.06	91.1	119.98
X5039	0.07079	0.00316	1.55126	0.06757	0.15903	0.0024	0.05102	0.00144	951.3	88.83	951	26.89	951.4	13.38	1005.8	27.61	951.4	13.38	55.37	103.62
X5040	0.0709	0.00238	1.58339	0.0518	0.16205	0.00212	0.04939	0.00083	954.6	67.19	963.7	20.36	968.2	11.78	974.3	16	968.2	11.78	211.91	179.53
X5041	0.07124	0.00224	1.55981	0.04769	0.15888	0.00202	0.04915	0.00147	964.4	62.79	954.4	18.92	950.5	11.24	969.9	28.27	950.5	11.24	58.96	229.04
X5042	0.0692	0.00157	1.49962	0.03318	0.15726	0.00177	0.04657	0.0008	904.6	46.02	930.2	13.48	941.5	9.87	920	15.4	941.5	9.87	210.61	455.28
X5043	0.08672	0.00234	2.75092	0.07218	0.23016	0.00289	0.06613	0.00117	1354.3	51.11	1342.3	19.54	1335.3	15.13	1294.2	22.16	1354.3	51.11	261.47	314.38
X5044	0.05698	0.00181	0.61714	0.01921	0.07858	0.00096	0.02478	0.00043	490.2	69.34	488.1	12.06	487.6	5.73	494.7	8.57	487.6	5.73	457.66	620.1
X5045	0.05422	0.00948	0.40868	0.07027	0.05469	0.00188	0.01704	0.00152	379.9	351.51	347.9	50.65	343.2	11.49	341.5	30.27	343.2	11.49	20.87	50.25
X5048	0.09715	0.00278	3.70225	0.10314	0.27644	0.00367	0.07582	0.00139	1570.1	52.72	1571.9	22.27	1573.4	18.53	1477.1	26.13	1570.1	52.72	114.67	111.55
X5049	0.09228	0.00316	3.29011	0.10942	0.25858	0.00373	0.08283	0.00264	1473.1	63.65	1478.7	25.9	1482.6	19.12	1608.4	49.25	1473.1	63.65	33.31	97.13
X5050	0.07039	0.00278	1.52358	0.05878	0.15698	0.00223	0.05128	0.00147	939.8	78.98	939.9	23.65	940	12.44	1010.8	28.25	940	12.44	60.01	137.13
X5051	0.07155	0.00186	1.55261	0.03955	0.15738	0.00188	0.04839	0.00124	973.1	52.24	951.5	15.73	942.2	10.47	955	23.82	942.2	10.47	77.37	337.86
X5052	0.10627	0.00218	4.56428	0.09144	0.31148	0.00367	0.09196	0.00194	1736.3	37.05	1742.8	16.69	1748	18.05	1778.1	35.82	1736.3	37.05	80.71	252.84
X5053	0.05397	0.00379	0.42914	0.02951	0.05766	0.00107	0.01926	0.0008	369.6	150.98	362.6	20.97	361.4	6.52	385.6	15.85	361.4	6.52	85.71	160.07
X5054	0.18173	0.00383	12.9014	0.26457	0.51477	0.00684	0.15036	0.00398	2668.7	34.44	2672.5	19.32	2677	29.1	2831.2	70.01	2668.7	34.44	27.62	85.05
X5055	0.06978	0.00328	1.39642	0.06401	0.14509	0.0023	0.04101	0.00131	921.9	93.76	887.4	27.12	873.4	12.97	812.3	25.38	873.4	12.97	130.12	244.84
X5056	0.06878	0.00181	1.5135	0.03901	0.15953	0.00191	0.0498	0.00084	892.2	53.4	935.9	15.76	954.2	10.64	982.4	16.16	954.2	10.64	209.43	316.72
X5057	0.07068	0.00176	1.53391	0.0375	0.15734	0.00186	0.05433	0.00104	948.1	50.25	944.1	15.03	942	10.38	1069.4	19.98	942	10.38	149.47	393.24
X5058	0.07148	0.00143	1.59748	0.03138	0.16202	0.00181	0.04041	0.00066	971.1	40.17	969.2	12.27	968	10.01	800.8	12.79	968	10.01	311.97	658.85
X5059	0.09382	0.0015	3.39879	0.05373	0.26261	0.00285	0.08597	0.00136	1504.4	29.88	1504.1	12.4	1503.2	14.56	1666.9	25.28	1504.4	29.88	174.5	615.28
X5060	0.10138	0.00274	4.1102	0.10839	0.29386	0.00387	0.08788	0.00184	1649.6	49.28	1656.3	21.54	1660.8	19.27	1702.5	34.22	1649.6	49.28	75.2	127.34
X5061	0.07199	0.00216	1.55067	0.04546	0.1561	0.00199	0.04908	0.00099	985.6	59.8	950.8	18.1	935.1	11.1	968.4	19.17	935.1	11.1	136.71	242.78
X5062	0.08941	0.00191	3.03626	0.06371	0.24607	0.00289	0.07363	0.00165	1413	40.24	1416.8	16.03	1418.2	14.97	1435.9	31.12	1413	40.24	67.32	277.52
X5063	0.07811	0.00403	2.10931	0.10591	0.19566	0.00345	0.06877	0.00244	1149.7	99.07	1151.9	34.59	1152	18.62	1344.3	46.2	1149.7	99.07	56.58	119.91
X5064	0.06997	0.00163	1.53486	0.03519	0.15893	0.00185	0.0469	0.00111	927.6	47.09	944.4	14.1	950.8	10.31	926.3	21.46	950.8	10.31	85.71	415.15
X5065	0.07758	0.00188	1.61653	0.03847	0.15097	0.00181	0.0479	0.00077	1136	47.5	976.6	14.93	906.4	10.11	945.6	14.89	906.4	10.11	227.92	328.49
X5066	0.05835	0.00543	0.67816	0.06165	0.08419	0.00206	0.04138	0.00332	543.1	191.55	525.7	37.3	521.1	12.22	819.6	64.35	521.1	12.22	39.16	260.09
X5067	0.07092	0.00191	1.5582	0.04116	0.15916	0.00195	0.04927	0.001	955	54.01	953.8	16.34	952.1	10.85	972	19.29	952.1	10.85	126.06	302.3
X5068	0.10514	0.0027	4.4081	0.11084	0.30368	0.00397	0.08806	0.0014	1716.7	46.47	1713.9	20.81	1709.5	19.61	1705.9	26.1	1716.7	46.47	168.27	135.5
X5069	0.07077	0.00212	1.57104	0.04626	0.16078	0.00206	0.0491	0.00098	950.8	60.23	958.8	18.27	961.1	11.44	968.9	18.86	961.1	11.44	139.44	232.77
X5070	0.07024	0.00185	1.62144	0.04202	0.16718	0.00204	0.05028	0.001	935.4	52.72	978.5	16.28	996.5	11.29	991.5	19.21	996.5	11.29	129.2	294.05
X5071	0.07	0.00163	1.58829	0.03643	0.1643	0.00193	0.04971	0.00092	928.5	46.98	965.6	14.29	980.7	10.69	980.6	17.75	980.7	10.69	142.98	371.3
X5072	0.07143	0.00225	1.57809	0.04867	0.15998	0.00209	0.05254	0.00104	969.7	62.86	961.6	19.17	956.7	11.63	1035.1	20.01	956.7	11.63	132.39	217.16
X5073	0.07195	0.00217	1.62601	0.04794	0.16375	0.00209	0.0512	0.00213	984.6	60.15	980.3	18.54	977.6	11.58	1009.3	40.94	977.6	11.58	46.86	381.55
X5074	0.08782	0.00278	2.80378	0.08673	0.23135	0.00316	0.06588	0.00138	1378.6	59.64	1356.5	23.15	1341.6	16.53	1289.5	26.26	1378.6	59.64	151.44	199.92
X5075	0.07236	0.00352	1.62436	0.07709	0.16267	0.00262	0.045	0.00117	996.2	95.72	979.7	29.83	971.6	14.51	889.6	22.6	971.6	14.51	90.46	100.98
X5076	0.07255	0.00219	1.59428	0.04706	0.15924	0.00203	0.05144	0.00107	1001.5	60.08	968	18.42	952.6	11.27	1013.9	20.61	952.6	11.27	165.87	319.36
X5077	0.07196	0.00312	1.63092	0.06911	0.16425	0.00251	0.04857	0.00136	984.8	85.96	982.2	26.67	980.4	13.87	958.5	26.25	980.4	13.87	112.08	185.27
X5078	0.05602	0.00199	0.55389	0.01931	0.07165	0.00092	0.02256	0.00033	453	77.03	447.5	12.62	446.1	5.53	451	6.53	446.1	5.53	939.48	553.19
X5079	0.0748	0.00245	1.6202	0.05181	0.157	0.00208	0.04759	0.00109	1063.1	64.55	978.1	20.08	940.1	11.61	939.7	21.03	940.1	11.61	138.98	257.03
X5080	0.07149	0.00224	1.59682	0.04903	0.1619	0.00208	0.05197	0.00139	971.4	62.73	969	19.17	967.3	11.52	1024.1	26.64	967.3	11.52	65.6	208.08
X5082	0.07327	0.00236	1.74896	0.05509	0.17301	0.00227	0.05405	0.00122	1021.6	63.92	1026.8	20.35	1028.7	12.48	1064.1	23.33	1021.6	63.92	117.57	228.71
X5083	0.05681	0.00262	0.60255	0.02725	0.07688	0.00111	0.02349	0.0006	483.6	99.57	478.9	17.26	477.5	6.65	469.2	11.88	477.5	6.65	178.47	286.01
X5084	0.07801	0.00217	2.06369	0.05608	0.19178	0.00239	0.06201	0.00139	1147	54.25	1136.8	18.59	1131	12.91	1216	26.41	1147	54.25	70.8	185.08
X5085	0.07191	0.00192	1.54773	0.04038	0.15604	0.00188	0.05015	0.00085	983.3	53.39	949.6	16.09	934.8	10.49	989.1	16.29	934.8	10.49	198.38	287.15
X5087	0.0522	0.00359	0.30993	0.02087	0.04305	0.00075	0.01282	0.0005	294.1	149.34	274.1	16.17	271.7	4.63	257.5	10.06	271.7	4.63	99.95	202.21
X5089	0.05897	0.00191	0.60552	0.01917	0.07446	0.00092	0.02472	0.00047	565.8	68.95	480.7	12.13	462.9	5.53	493.6	9.34	462.9	5.53	275.45	477.13
X5090	0.07218	0.00197	1.62387	0.04328	0.16313	0.00198	0.04951	0.00094	990.9	54.48	979.5	16.75	974.2	10.95	976.8	18.1	974.2	10.95	146.67	272.35
X5091	0.07485	0.00386	1.6461	0.08262	0.15947	0.00275	0.04081	0.00175	1064.4	100.43	988.1	31.7	953.8	15.3	808.5	33.93	953.8	15.3	99.07	237.91
X5092	0.07196	0.00219	1.58361	0.04695	0.15958	0.00201	0.05106	0.00091	984.8	60.61	963.8	18.45	954.4	11.2	1006.6	17.42	954.4	11.2	205.48	255.42
X5093	0.05671	0.00171	0.53947	0.01593	0.06899	0.00083	0.02189	0.00041	479.4	66.01	438.1	10.51	430	4.98	437.6	8.21	430	4.98	341.49	666.7
X5094	0.05209	0.00625	0.29374	0.03466	0.0409	0.00103	0.01264	0.00079	289.2	252.7	261.5	27.2	258.4	6.4	253.9	15.74	258.4	6.4	57.57	82.22
X5095	0.07023	0.00168	1.53632	0.03594	0.15863	0.00183	0.05	0.00095	935.1	48.32	945	14.39	949.2	10.19	986.2	18.32	949.2	10.19	121.99	315.52
X5097	0.07176	0.00202	1.60002	0.04401	0.16171	0.00198	0.05141	0.00096	979.1	56.4	970.2	17.19	966.3	10.96	1013.3	18.54	966.3	10.96	132.64	226.6
X5098	0.08639	0.00191	2.80797	0.06061	0.23573	0.00273	0.07345	0.00124	1347	42.14	1357.7	16.16	1364.4	14.25	1432.5	23.4	1347	42.14	119.68	218.67
X5099	0.07417	0.00212	1.59111	0.04423	0.15559	0.00192	0.04704	0.00099	1046.1	56.47	966.7	17.33	932.2	10.69	929.1	19.18	932.2	10.69	141.04	296.58
X5100	0.07404	0.0034	1.69959	0.07591	0.16649	0.00264	0.08481	0.00457	1042.5	89.94	1008.4	28.55	992.8	14.6	1645.3	85.17	992.8	14.6	23.6	226.8
X5101	0.07447	0.00203	1.60441	0.04256	0.15626	0.00189	0.03825	0.00092	1053.9	54.22	971.9	16.59	936	10.56	758.6	17.83	936	10.56	182.42	469.12
X5102	0.05879	0.00201	0.63259	0.0211	0.07804	0.00098	0.02524	0.00049	559.5	72.74	497.7	13.12	484.4	5.86	503.8	9.63	484.4	5.86	235.11	358.35
X5103	0.07074	0.00215	1.52822	0.04537	0.15669	0.00196	0.04676	0.00089	950	61.07	941.8	18.22	938.4	10.9	923.7	17.12	938.4	10.9	142.84	208.56
X5104	0.07095	0.00223	1.54263	0.04732	0.1577	0.002	0.05169	0.00103	956.1	63.05	947.6	18.9	944	11.16	1018.6	19.84	944	11.16	125.19	208.69
X5105	0.07417	0.00199	1.79643	0.0469	0.17567	0.00211	0.04582	0.00181	1046.2	53.11	1044.2	17.03	1043.3	11.59	905.6	34.95	1046.2	53.11	60.94	528.82
X5106	0.06985	0.00199	1.51635	0.04223	0.15746	0.00191	0.04773	0.00096	924	57.57	937	17.04	942.7	10.63	942.4	18.55	942.7	10.63	107.99	221.29
X5107	0.07117	0.00277	1.53501	0.0583	0.15645	0.00221	0.04698	0.00111	962.3	77.67	944.5	23.35	937	12.3	928	21.35	937	12.3	107.54	151.68
X5108	0.05736	0.00195	0.55734	0.01857	0.07048	0.00087	0.01995	0.00043	505	73.72	449.8	12.11	439	5.24	399.3	8.43	439	5.24	212.55	400.05
X5109	0.07266	0.00196	1.5899	0.04183	0.15874	0.00189	0.0463	0.00088	1004.4	53.56	966.3	16.4	949.8	10.53	914.9	17.05	949.8	10.53	137.99	247.88
X5110	0.07061	0.00219	1.57745	0.04778	0.16207	0.00203	0.0511	0.00106	946.1	62.38	961.4	18.82	968.3	11.29	1007.3	20.45	968.3	11.29	96.72	172.61
X5112	0.0721	0.00191	1.4722	0.03794	0.14813	0.00175	0.04529	0.00096	988.8	52.96	919	15.58	890.5	9.84	895.2	18.56	890.5	9.84	164.28	433.02
X5113	0.0584	0.00279	0.57292	0.02675	0.07117	0.00105	0.02203	0.00062	544.7	101.27	459.9	17.27	443.2	6.29	440.4	12.19	443.2	6.29	107.69	196.34
X5114	0.07094	0.00265	1.57179	0.05725	0.16074	0.0022	0.04793	0.00115	955.7	74.63	959.1	22.6	960.9	12.22	946.3	22.19	960.9	12.22	63.81	108.64
X5115	0.07194	0.00165	1.58101	0.03527	0.15945	0.00179	0.04766	0.00121	984.1	45.98	962.8	13.87	953.7	9.96	941.1	23.41	953.7	9.96	60.96	342.34
X5116	0.07065	0.00206	1.53481	0.04362	0.1576	0.00192	0.04949	0.00103	947.4	58.62	944.4	17.47	943.4	10.67	976.2	19.77	943.4	10.67	93.84	203.08
X5117	0.07142	0.00205	1.5367	0.04301	0.15611	0.0019	0.04648	0.00093	969.3	57.6	945.2	17.21	935.1	10.58	918.3	17.99	935.1	10.58	110.13	206.09
X5118	0.07094	0.00187	1.54218	0.03953	0.15773	0.00185	0.04425	0.00082	955.6	52.95	947.4	15.79	944.1	10.31	875.1	15.89	944.1	10.31	135.37	239.7
X5119	0.07329	0.0016	1.58232	0.03354	0.15663	0.00173	0.04944	0.00082	1022.1	43.52	963.3	13.19	938	9.65	975.5	15.75	938	9.65	165.61	361.91
X5121	0.0705	0.00269	1.57713	0.05875	0.16231	0.00222	0.04911	0.00099	942.9	76.4	961.2	23.15	969.6	12.3	969	19.14	969.6	12.3	92.69	103.69
X5122	0.07015	0.00195	1.50797	0.04084	0.15596	0.00186	0.04771	0.00097	932.8	56.13	933.6	16.54	934.3	10.38	942.1	18.69	934.3	10.38	103.65	206.43
X5123	0.05429	0.0036	0.31147	0.02018	0.04163	0.00073	0.01266	0.00048	382.9	142.4	275.3	15.62	262.9	4.51	254.3	9.59	262.9	4.51	115.35	193.45
X5124	0.07125	0.0018	1.59271	0.0392	0.16219	0.00187	0.05913	0.00144	964.6	50.88	967.4	15.35	968.9	10.4	1161.2	27.46	968.9	10.4	114.71	544.29
X5125	0.05698	0.00196	0.55666	0.01869	0.07088	0.00087	0.02314	0.00055	490.1	74.77	449.3	12.19	441.5	5.25	462.4	10.87	441.5	5.25	142.41	389.36
X5126	0.07119	0.0028	1.56386	0.05987	0.15938	0.00223	0.04643	0.00111	963	78.33	956	23.71	953.3	12.4	917.3	21.35	953.3	12.4	71.94	99.39
X5127	0.07264	0.00145	1.64692	0.03185	0.1645	0.00176	0.04566	0.00083	1003.9	39.96	988.4	12.22	981.7	9.77	902.4	16.13	981.7	9.77	197.03	651.46
X5128	0.07089	0.00228	1.60773	0.05023	0.16455	0.00209	0.05089	0.00107	954.2	64.36	973.2	19.56	982	11.54	1003.2	20.53	982	11.54	94.07	153.79
X5129	0.05699	0.00164	0.55598	0.01556	0.07079	0.00081	0.02388	0.00063	490.4	62.77	448.9	10.16	440.9	4.89	477.1	12.48	440.9	4.89	112.13	568.74
X5130	0.07363	0.00129	1.63085	0.02761	0.16071	0.00167	0.05101	0.00099	1031.4	34.96	982.2	10.66	960.7	9.26	1005.5	19.13	960.7	9.26	97.6	629.74
X5131	0.0704	0.00156	1.53341	0.03297	0.15803	0.00173	0.04788	0.00082	940.1	44.76	943.9	13.21	945.8	9.65	945.4	15.89	945.8	9.65	143.56	343.04
X5132	0.07037	0.00184	1.51679	0.03851	0.15639	0.00181	0.05486	0.00163	939.2	52.71	937.2	15.54	936.7	10.11	1079.4	31.27	936.7	10.11	35.42	226.63
X5133	0.05628	0.00118	0.56757	0.01153	0.07317	0.00077	0.0231	0.00032	462.7	46.05	456.4	7.47	455.2	4.6	461.6	6.32	455.2	4.6	588.71	1043.2
X5134	0.06964	0.00167	1.47842	0.03432	0.15405	0.00172	0.04632	0.00073	917.6	48.45	921.6	14.06	923.6	9.62	915.1	14.15	923.6	9.62	196.91	291.93
X5135	0.07022	0.00167	1.49779	0.03451	0.15476	0.00173	0.04559	0.0008	934.8	48	929.5	14.03	927.6	9.65	901.2	15.48	927.6	9.65	165.16	334.78
X5136	0.05729	0.0019	0.62637	0.02026	0.07933	0.00096	0.02407	0.00051	502.3	71.99	493.8	12.65	492.1	5.75	480.7	10.15	492.1	5.75	165.63	331.05
X5137	0.06989	0.00176	1.52749	0.03728	0.15858	0.00181	0.05429	0.00122	925.2	50.87	941.5	14.98	948.9	10.05	1068.5	23.36	948.9	10.05	106.88	420.18
X5138	0.07046	0.00138	1.51319	0.02869	0.15582	0.00164	0.04328	0.00068	941.9	39.66	935.7	11.59	933.5	9.17	856.5	13.12	933.5	9.17	211.08	475.8
X5139	0.08546	0.00187	2.74584	0.05795	0.23311	0.00261	0.07236	0.00134	1326	41.8	1341	15.71	1350.8	13.67	1412.1	25.21	1326	41.8	112.63	277.37
X5140	0.05591	0.0015	0.53009	0.01379	0.06879	0.00076	0.02424	0.00045	448.4	58.3	431.9	9.15	428.9	4.61	484.1	8.84	428.9	4.61	223.91	610.17
X5141	0.07176	0.00244	1.53988	0.05077	0.15571	0.00202	0.04779	0.00091	979	67.73	946.5	20.3	932.9	11.29	943.7	17.48	932.9	11.29	118.46	133.8
X5142	0.07005	0.00168	1.49801	0.0349	0.15516	0.00173	0.05027	0.00092	929.9	48.59	929.6	14.19	929.8	9.65	991.4	17.78	929.8	9.65	106.68	271.43
X5143	0.07018	0.00171	1.48674	0.035	0.15371	0.00173	0.04627	0.0007	933.6	49.1	925	14.29	921.7	9.64	914.3	13.53	921.7	9.64	274.57	340.11
X5144	0.0957	0.00345	3.5412	0.12349	0.26849	0.00398	0.1016	0.00404	1541.9	66.31	1536.5	27.61	1533.1	20.22	1955.8	74.17	1541.9	66.31	26.68	131.71
X5145	0.07222	0.0022	1.53728	0.04537	0.15445	0.0019	0.04539	0.00078	992	60.71	945.4	18.16	925.9	10.6	897.2	15.08	925.9	10.6	200.57	209.58
X5147	0.0719	0.0012	1.51931	0.02433	0.15331	0.00155	0.03478	0.00072	983.1	33.58	938.2	9.81	919.5	8.65	691	14	919.5	8.65	136.78	857.27
X5148	0.07211	0.00261	1.51501	0.05312	0.15244	0.00205	0.05006	0.00161	988.9	71.88	936.5	21.45	914.6	11.46	987.3	31	914.6	11.46	108.94	393.56
X5149	0.09144	0.00161	3.13162	0.05278	0.24847	0.0026	0.07281	0.00088	1455.7	33.17	1440.5	12.97	1430.6	13.42	1420.5	16.52	1455.7	33.17	433.92	375.92
X5150	0.05645	0.00135	0.56164	0.01306	0.07218	0.00077	0.02252	0.00042	469.5	52.8	452.6	8.49	449.3	4.65	450.1	8.23	449.3	4.65	302.67	940.61
XSG_48.3 Ma
X6001	0.11349	0.00844	5.04508	0.36415	0.32245	0.00873	0.07787	0.00752	1856.1	128.67	1826.9	61.17	1801.7	42.56	1515.7	141.04	1856.1	128.67	3.2	14.04
X6002	0.05721	0.00463	0.57039	0.04506	0.07231	0.00154	0.0245	0.0008	499.2	169.55	458.3	29.13	450.1	9.24	489.3	15.87	450.1	9.24	182.98	179.62
X6003	0.05015	0.00254	0.25178	0.01248	0.03642	0.00051	0.00984	0.00025	202	113.32	228	10.12	230.6	3.16	198	5.04	230.6	3.16	261.15	406.06
X6004	0.1486	0.00284	8.8933	0.16393	0.4341	0.00517	0.11594	0.00171	2329.9	32.4	2327.1	16.82	2324.2	23.23	2217.2	31.04	2329.9	32.4	209.81	185.97
X6005	0.16371	0.00273	10.6121	0.1709	0.47018	0.00535	0.13197	0.00229	2494.4	27.86	2489.8	14.94	2484.3	23.45	2505.4	40.97	2494.4	27.86	149.61	318.97
X6006	0.05579	0.00234	0.51884	0.02125	0.06746	0.00091	0.02145	0.00052	443.7	90.49	424.4	14.2	420.8	5.49	429	10.31	420.8	5.49	129.87	247.11
X6007	0.05579	0.00323	0.52539	0.02974	0.06831	0.0011	0.02072	0.00067	443.6	124.22	428.7	19.8	426	6.66	414.6	13.27	426	6.66	105.92	187.7
X6008	0.05114	0.00553	0.25107	0.02664	0.03561	0.00082	0.01301	0.00051	247	230.73	227.4	21.62	225.6	5.13	261.2	10.23	225.6	5.13	90.76	108.66
X6009	0.05413	0.00349	0.47961	0.03023	0.06427	0.00109	0.01894	0.00061	376.3	138.63	397.8	20.75	401.5	6.59	379.2	12.05	401.5	6.59	105.75	159.98
X6010	0.06932	0.00208	1.40144	0.04094	0.14663	0.0018	0.04249	0.00137	908.4	60.66	889.5	17.31	882.1	10.1	841	26.53	882.1	10.1	41.04	211.09
X6011	0.05137	0.00368	0.27649	0.01943	0.03904	0.00066	0.01149	0.00039	257.3	156.58	247.9	15.46	246.9	4.08	230.9	7.72	246.9	4.08	126.21	191.53
X6012	0.05353	0.00277	0.30478	0.01538	0.0413	0.00061	0.01442	0.00033	351.2	112.04	270.1	11.97	260.9	3.79	289.3	6.64	260.9	3.79	273.92	345.28
X6013	0.07278	0.00636	1.41599	0.12045	0.14111	0.00348	0.04024	0.00197	1007.9	167.72	895.7	50.62	850.9	19.67	797.4	38.27	850.9	19.67	31.62	40.58
X6014	0.05711	0.00333	0.54861	0.03125	0.06968	0.00113	0.02432	0.00067	495.2	124.13	444.1	20.49	434.2	6.82	485.6	13.32	434.2	6.82	97.33	144.51
X6015	0.0717	0.00723	1.4157	0.13887	0.14321	0.00414	0.09179	0.01325	977.5	193.04	895.6	58.37	862.8	23.33	1775	245.21	862.8	23.33	5.19	86.04
X6016	0.06876	0.00192	1.34936	0.03668	0.14233	0.0017	0.04336	0.00078	891.6	56.7	867.3	15.85	857.8	9.58	857.9	15.19	857.8	9.58	173.74	277.48
X6017	0.0543	0.00177	0.52027	0.01654	0.0695	0.00084	0.02252	0.00035	383.3	71.4	425.3	11.05	433.1	5.05	450.2	6.98	433.1	5.05	451.28	444.29
X6018	0.05303	0.00203	0.34291	0.01284	0.04691	0.00059	0.01489	0.00023	329.8	84.65	299.4	9.71	295.5	3.66	298.7	4.67	295.5	3.66	619.7	452.19
X6020	0.11854	0.00533	5.69553	0.24774	0.3485	0.00655	0.10456	0.00213	1934.3	78.35	1930.7	37.57	1927.4	31.3	2010	38.95	1934.3	78.35	64.71	29.37
X6021	0.07102	0.00162	1.52243	0.03367	0.15549	0.00174	0.05187	0.00119	957.9	45.85	939.5	13.55	931.6	9.7	1022.2	22.88	931.6	9.7	109.68	551.71
X6022	0.05403	0.01046	0.4637	0.08837	0.06225	0.00234	0.02096	0.00148	372	385.66	386.8	61.3	389.3	14.22	419.2	29.22	389.3	14.22	26.19	34.75
X6023	0.05318	0.00675	0.43553	0.0542	0.0594	0.00168	0.0164	0.00095	336.6	264.62	367.1	38.33	372	10.2	328.7	18.86	372	10.2	80.77	102.48
X6024	0.05433	0.00334	0.38445	0.02309	0.05132	0.00087	0.01693	0.00047	384.8	132.44	330.3	16.94	322.6	5.32	339.4	9.4	322.6	5.32	223.59	262.37
X6025	0.05244	0.00345	0.3213	0.02064	0.04444	0.00077	0.01317	0.00045	304.6	142.86	282.9	15.86	280.3	4.73	264.4	8.97	280.3	4.73	170.2	247.31
X6026	0.05576	0.00385	0.53191	0.03587	0.06919	0.00126	0.0226	0.00081	442.5	146.8	433.1	23.77	431.3	7.57	451.8	16.02	431.3	7.57	72.61	127.48
X6027	0.05768	0.0026	0.59037	0.02595	0.07423	0.00105	0.02316	0.00047	517.4	96.24	471.1	16.57	461.6	6.31	462.7	9.2	461.6	6.31	302.92	283.84
X6028	0.09229	0.00387	3.15101	0.12794	0.24763	0.00404	0.08294	0.0022	1473.3	77.63	1445.2	31.29	1426.3	20.86	1610.5	41.1	1473.3	77.63	37.45	50.37
X6029	0.0534	0.00341	0.40021	0.02511	0.05435	0.00085	0.01754	0.00043	345.9	137.77	341.8	18.21	341.2	5.22	351.4	8.57	341.2	5.22	235.62	248.78
X6030	0.05523	0.00156	0.49421	0.01365	0.0649	0.00074	0.01889	0.00039	421.3	61.52	407.8	9.28	405.4	4.51	378.3	7.77	405.4	4.51	280.22	757.75
X6031	0.05648	0.00266	0.55475	0.02551	0.07125	0.00101	0.02302	0.00076	470.4	101.62	448.1	16.66	443.7	6.09	460.1	14.98	443.7	6.09	88.52	242.14
X6033	0.05675	0.00676	0.53997	0.06292	0.06901	0.00195	0.02075	0.00108	481.2	244.25	438.4	41.49	430.2	11.74	415.1	21.42	430.2	11.74	81.4	96.57
X6034	0.05127	0.00246	0.34662	0.0163	0.04903	0.00069	0.01625	0.00032	253.2	106.84	302.2	12.29	308.6	4.23	325.9	6.3	308.6	4.23	364.64	323.86
X6035	0.05609	0.00292	0.52947	0.02687	0.06846	0.00104	0.02163	0.00055	455.7	111.73	431.5	17.84	426.9	6.3	432.5	10.92	426.9	6.3	203.86	278.46
X6036	0.11385	0.00615	5.25004	0.27478	0.33447	0.00715	0.0902	0.00332	1861.7	94.55	1860.8	44.64	1860	34.52	1745.5	61.48	1861.7	94.55	35.95	39.08
X6038	0.05301	0.00537	0.26424	0.02618	0.03615	0.00087	0.01234	0.00044	329.4	214.96	238.1	21.03	228.9	5.39	247.9	8.77	228.9	5.39	273.6	234.32
X6039	0.05377	0.0038	0.29634	0.02045	0.03997	0.00072	0.01007	0.00121	361.3	151.63	263.5	16.02	252.7	4.49	202.5	24.23	252.7	4.49	32.73	274.25
X6041	0.05691	0.00289	0.53743	0.02665	0.06849	0.00102	0.02187	0.00055	487.5	108.9	436.7	17.6	427	6.16	437.3	10.84	427	6.16	161.08	224.24
X6042	0.05378	0.00235	0.35936	0.01535	0.04846	0.00065	0.01635	0.00047	361.8	95.39	311.7	11.47	305.1	3.98	327.8	9.33	305.1	3.98	183.92	549.48
X6044	0.07083	0.00262	1.5397	0.05548	0.15766	0.00216	0.04827	0.00093	952.5	73.96	946.4	22.18	943.8	12.01	952.8	17.86	943.8	12.01	152.29	148.14
X6045	0.11661	0.00281	5.62306	0.13112	0.34975	0.00444	0.09683	0.00245	1904.9	42.68	1919.6	20.1	1933.4	21.19	1868.2	45.16	1904.9	42.68	44.24	122.94
X6046	0.05506	0.00231	0.54331	0.02228	0.07157	0.00097	0.02233	0.00052	414.6	90.87	440.6	14.66	445.6	5.83	446.4	10.21	445.6	5.83	200.89	310.84
X6047	0.05763	0.00829	0.58265	0.08193	0.07333	0.00252	0.03315	0.00226	515.3	288.56	466.2	52.56	456.2	15.13	659.1	44.14	456.2	15.13	39.52	78.68
X6048	0.07094	0.00236	1.37523	0.04444	0.14061	0.00183	0.04396	0.00103	955.6	66.57	878.4	19	848.1	10.36	869.6	19.92	848.1	10.36	125.6	248.09
X6049	0.16003	0.00281	10.1967	0.17317	0.46214	0.00539	0.12984	0.00208	2456	29.41	2452.8	15.7	2449	23.76	2467.5	37.21	2456	29.41	108.07	141.94
X6050	0.05504	0.0026	0.56568	0.02614	0.07454	0.00106	0.0229	0.00081	413.7	102.1	455.2	16.95	463.5	6.39	457.6	16.02	463.5	6.39	75.7	257.92
X6051	0.06799	0.00237	1.41098	0.04796	0.15051	0.00198	0.04844	0.00104	868.3	70.73	893.6	20.2	903.8	11.11	956.1	20.13	903.8	11.11	119.42	188.24
X6052	0.05449	0.00633	0.50749	0.05789	0.06755	0.00169	0.02201	0.00099	391.3	241.48	416.8	38.99	421.4	10.22	440.1	19.52	421.4	10.22	52.43	60.57
X6053	0.05165	0.00415	0.27955	0.02202	0.03925	0.00074	0.01244	0.00047	270	174.11	250.3	17.47	248.2	4.6	249.8	9.3	248.2	4.6	124.69	202.08
X6054	0.10399	0.0023	4.25756	0.09131	0.29694	0.00354	0.09176	0.00162	1696.5	40.28	1685.2	17.63	1676.1	17.59	1774.4	30.01	1696.5	40.28	124.9	201.19
X6055	0.07099	0.00218	1.47233	0.04391	0.15042	0.00188	0.04892	0.00105	957.2	61.45	919.1	18.03	903.3	10.54	965.3	20.31	903.3	10.54	100.07	210.12
X6056	0.05599	0.00343	0.55992	0.03348	0.07254	0.00124	0.02194	0.00071	451.5	130.86	451.5	21.79	451.4	7.44	438.6	13.98	451.4	7.44	191.37	271.77
X6057	0.05595	0.0024	0.54176	0.02271	0.07023	0.00097	0.02346	0.00053	450	92.99	439.6	14.95	437.5	5.82	468.6	10.43	437.5	5.82	265.56	389.6
X6058	0.05553	0.00189	0.53743	0.01785	0.07019	0.00087	0.02279	0.00044	433.5	73.96	436.7	11.79	437.3	5.21	455.5	8.73	437.3	5.21	314.62	508.83
X6059	0.06915	0.00228	1.48078	0.04743	0.15531	0.002	0.04771	0.00105	903.3	66.42	922.5	19.41	930.7	11.19	942.1	20.23	930.7	11.19	118.1	212.88
X6060	0.15999	0.00238	10.3481	0.14893	0.46912	0.00511	0.13136	0.0023	2455.5	24.91	2466.4	13.33	2479.7	22.42	2494.6	41.02	2455.5	24.91	84.11	261.64
X6061	0.05476	0.00243	0.49888	0.02157	0.06608	0.00092	0.02197	0.00054	402.4	95.72	410.9	14.61	412.5	5.56	439.3	10.67	412.5	5.56	184.62	322.57
X6062	0.05505	0.00323	0.47935	0.02751	0.06316	0.00104	0.01881	0.00069	414.1	125.63	397.6	18.88	394.8	6.28	376.6	13.75	394.8	6.28	110.69	227.67
X6063	0.10683	0.00203	4.27334	0.07847	0.29013	0.00327	0.08964	0.00166	1746	34.28	1688.2	15.11	1642.2	16.31	1735.1	30.87	1746	34.28	106.12	292.29
X6064	0.13724	0.00282	7.60074	0.15091	0.40168	0.00491	0.12496	0.00241	2192.7	35.28	2185	17.82	2176.8	22.56	2379.9	43.26	2192.7	35.28	74.25	142.39
X6065	0.06858	0.00134	1.45453	0.02774	0.15383	0.00165	0.04669	0.0013	886.1	39.98	911.8	11.48	922.4	9.24	922.4	25.12	922.4	9.24	64.81	706.6
X6066	0.0543	0.00243	0.5095	0.02227	0.06806	0.00094	0.02095	0.00054	383.3	96.92	418.1	14.98	424.5	5.68	419	10.72	424.5	5.68	194.22	324.35
X6067	0.07289	0.00272	1.61044	0.05842	0.16024	0.00225	0.07685	0.00243	1011	73.9	974.3	22.72	958.1	12.48	1496.6	45.61	958.1	12.48	80.31	360.42
X6068	0.05361	0.00226	0.4885	0.02015	0.0661	0.00089	0.02216	0.00049	354.4	92.36	403.9	13.74	412.6	5.36	443.1	9.68	412.6	5.36	224.8	354.01
X6069	0.06978	0.00178	1.44503	0.0358	0.1502	0.00175	0.04908	0.00091	921.9	51.5	907.8	14.87	902.1	9.81	968.4	17.58	902.1	9.81	176.88	364.45
X6070	0.10872	0.00168	4.78229	0.07185	0.31904	0.00339	0.09555	0.00182	1778	28.03	1781.8	12.62	1785	16.55	1844.6	33.59	1778	28.03	78.79	405.31
X6071	0.05436	0.00201	0.52331	0.01893	0.06983	0.00089	0.02311	0.00046	385.8	80.4	427.4	12.62	435.1	5.35	461.9	9.12	435.1	5.35	264.18	389.19
X6072	0.08082	0.00341	2.31437	0.09491	0.20769	0.00326	0.06695	0.00152	1217.1	80.82	1216.7	29.08	1216.5	17.41	1309.9	28.87	1217.1	80.82	147.9	145.2
X6073	0.05479	0.00201	0.55777	0.01998	0.07384	0.00094	0.02281	0.00054	403.5	79.38	450.1	13.02	459.3	5.65	455.8	10.63	459.3	5.65	168.26	382.58
X6074	0.05502	0.00193	0.52333	0.01797	0.06899	0.00087	0.02153	0.00042	413	76.18	427.4	11.98	430.1	5.24	430.6	8.21	430.1	5.24	316.12	480.65
X6075	0.053	0.00433	0.50506	0.04042	0.06912	0.0014	0.01999	0.00091	328.7	175.12	415.1	27.27	430.9	8.43	400.1	17.98	430.9	8.43	53.73	105.7
X6076	0.0562	0.00169	0.61417	0.01799	0.07927	0.00094	0.02334	0.0004	459.3	65.68	486.2	11.31	491.8	5.64	466.3	7.95	491.8	5.64	431.03	626.29
X6077	0.05075	0.01952	0.25151	0.09601	0.03595	0.0018	0.00941	0.00084	229.4	706.82	227.8	77.89	227.7	11.2	189.4	16.87	227.7	11.2	38.36	27.58
X6078	0.05214	0.00491	0.27497	0.02542	0.03825	0.0008	0.01276	0.00034	291.5	201.38	246.7	20.25	242	4.99	256.3	6.81	242	4.99	224.5	153.79
X6079	0.04854	0.00479	0.26796	0.02597	0.04004	0.00086	0.01227	0.00032	125.6	217.14	241.1	20.8	253.1	5.34	246.5	6.48	253.1	5.34	225.72	122.44
X6080	0.06965	0.00261	1.33609	0.04873	0.13913	0.00194	0.04408	0.00139	918.2	75.29	861.5	21.18	839.7	10.95	871.9	26.92	839.7	10.95	83.44	275.78
X6081	0.0538	0.00158	0.51248	0.01466	0.06909	0.00081	0.02218	0.00041	362.7	64.57	420.1	9.84	430.7	4.87	443.5	8.1	430.7	4.87	300.54	630.9
X6082	0.05563	0.00171	0.57989	0.01741	0.07561	0.00091	0.02275	0.00043	437.2	66.84	464.4	11.19	469.9	5.42	454.7	8.43	469.9	5.42	295.1	530.91
X6083	0.05439	0.00144	0.51871	0.01342	0.06918	0.00079	0.02184	0.00044	387	58.12	424.3	8.97	431.2	4.74	436.8	8.71	431.2	4.74	260.08	845.05
X6084	0.07606	0.00275	1.93805	0.06814	0.18482	0.0026	0.05362	0.00117	1096.6	70.77	1094.3	23.55	1093.3	14.16	1055.8	22.53	1096.6	70.77	133.96	170.95
X6085	0.05556	0.00293	0.65328	0.03374	0.08528	0.00131	0.02964	0.00163	434.6	113.78	510.5	20.72	527.6	7.8	590.3	32.02	527.6	7.8	21.12	165.78
X6086	0.19049	0.00563	14.0203	0.39982	0.53384	0.00904	0.15908	0.00372	2746.4	47.78	2751.1	27.03	2757.6	38	2983.9	64.86	2746.4	47.78	29.43	28.38
X6087	0.05298	0.00331	0.32812	0.02004	0.04492	0.00075	0.01531	0.00036	327.9	135.11	288.1	15.32	283.3	4.63	307.1	7.27	283.3	4.63	301.24	268.5
X6088	0.08156	0.00357	2.39742	0.10194	0.21319	0.00342	0.06232	0.00194	1235	83.43	1241.8	30.47	1245.8	18.16	1221.9	37	1235	83.43	40.35	73.44
X6089	0.05515	0.00151	0.52319	0.014	0.06881	0.00079	0.0217	0.00041	418.1	59.49	427.3	9.33	429	4.77	433.9	8.05	429	4.77	315.8	771.15
X6090	0.11274	0.0026	5.1713	0.11572	0.3327	0.00414	0.09545	0.00172	1844	41.22	1847.9	19.04	1851.4	20.05	1842.7	31.82	1844	41.22	84.55	118.26
X6091	0.05148	0.00372	0.28601	0.02025	0.0403	0.00072	0.01375	0.00048	262.4	157.87	255.4	15.99	254.7	4.48	276	9.67	254.7	4.48	113.55	189.65
X6092	0.05103	0.00246	0.2726	0.01287	0.03875	0.00055	0.01198	0.00026	242	107.48	244.8	10.27	245.1	3.41	240.6	5.15	245.1	3.41	415.4	473.21
X6093	0.05789	0.00168	0.53833	0.01525	0.06745	0.00079	0.02165	0.00036	525.4	62.68	437.3	10.07	420.7	4.79	432.9	7.07	420.7	4.79	416.77	613.95
X6094	0.05157	0.0038	0.30698	0.02213	0.04318	0.0008	0.01531	0.00061	266.2	160.46	271.8	17.19	272.5	4.92	307.1	12.08	272.5	4.92	128.23	279.45
X6095	0.08923	0.00165	3.00581	0.054	0.24433	0.00269	0.07106	0.00092	1409	34.9	1409.1	13.69	1409.2	13.94	1387.5	17.44	1409	34.9	333.15	350.02
X6096	0.10481	0.00201	4.40206	0.08191	0.30464	0.00347	0.08346	0.00113	1710.9	34.85	1712.7	15.4	1714.3	17.15	1620.1	21.02	1710.9	34.85	277.19	247.48
X6097	0.0527	0.00294	0.44032	0.02407	0.0606	0.00094	0.01763	0.00053	316	121.95	370.5	16.97	379.2	5.7	353.2	10.56	379.2	5.7	139.3	211.9
X6098	0.05291	0.00321	0.45208	0.02681	0.06197	0.00104	0.02744	0.00408	324.8	131.9	378.7	18.75	387.6	6.3	547.2	80.26	387.6	6.3	12.68	594.34
X6099	0.05268	0.00404	0.308	0.0231	0.04241	0.00081	0.01287	0.00048	314.9	164.86	272.6	17.93	267.7	5.01	258.5	9.64	267.7	5.01	200.68	297.91
X6100	0.05593	0.00354	0.53432	0.03306	0.06928	0.00118	0.01817	0.00071	449.4	134.97	434.7	21.88	431.8	7.11	364	14.11	431.8	7.11	91.09	173.84
X6101	0.05474	0.00158	0.52433	0.01476	0.06947	0.00081	0.02135	0.00042	401.7	62.53	428	9.83	433	4.9	426.9	8.28	433	4.9	310.39	718.21
X6102	0.0528	0.00489	0.30083	0.02729	0.04132	0.00088	0.01116	0.00073	320.2	197.42	267	21.3	261	5.45	224.3	14.6	261	5.45	44.74	127.77
X6103	0.16361	0.00337	10.2895	0.20464	0.45615	0.00582	0.12185	0.00203	2493.3	34.25	2461.2	18.41	2422.5	25.78	2323.9	36.61	2493.3	34.25	99.64	96.94
X6104	0.06819	0.00159	1.4322	0.03249	0.15234	0.00173	0.0442	0.00083	874.3	47.46	902.5	13.56	914.1	9.67	874.2	16.01	914.1	9.67	161.86	408.08
X6105	0.05251	0.00191	0.32526	0.01158	0.04492	0.00057	0.0155	0.00035	307.8	80.88	285.9	8.87	283.3	3.49	310.9	7.03	283.3	3.49	310.11	764.17
X6106	0.06482	0.00241	1.14922	0.04155	0.12859	0.00174	0.04124	0.00078	768.4	76.26	776.9	19.63	779.8	9.92	816.8	15.14	779.8	9.92	161.57	173.93
X6107	0.16319	0.00239	10.6236	0.15101	0.47216	0.00518	0.13363	0.00187	2489	24.43	2490.8	13.19	2493	22.66	2535.1	33.34	2489	24.43	136.93	217.72
X6108	0.05386	0.00194	0.46302	0.01631	0.06235	0.00079	0.01787	0.00034	365	79.11	386.4	11.32	389.9	4.79	358.1	6.72	389.9	4.79	349.24	415.43
X6109	0.05624	0.00207	0.56323	0.02023	0.07263	0.00094	0.02204	0.00072	461.3	79.63	453.6	13.14	452	5.63	440.7	14.29	452	5.63	99.75	455.24
X6111	0.06833	0.00149	1.47241	0.03128	0.15628	0.00174	0.04335	0.0009	878.7	44.43	919.1	12.84	936.1	9.7	857.7	17.52	936.1	9.7	99.63	381.19
X6112	0.05559	0.00188	0.57626	0.019	0.07519	0.00094	0.0222	0.00043	435.7	73.41	462.1	12.24	467.3	5.62	443.7	8.49	467.3	5.62	261.34	387.36
X6113	0.06944	0.00257	1.44254	0.05206	0.15068	0.00208	0.04886	0.00093	911.7	74.52	906.8	21.64	904.8	11.65	964.2	18.01	904.8	11.65	133.8	135.74
X6114	0.05515	0.00201	0.53264	0.01899	0.07005	0.00089	0.02232	0.00043	418.1	79.08	433.6	12.58	436.5	5.38	446.1	8.45	436.5	5.38	276.41	386.11
X6115	0.07035	0.00206	1.48347	0.04238	0.15294	0.0019	0.049	0.00101	938.5	59.03	923.7	17.33	917.5	10.6	967	19.38	917.5	10.6	118.25	230.12
X6116	0.05497	0.00214	0.55319	0.02103	0.07299	0.00096	0.02329	0.00047	410.8	84.18	447.1	13.75	454.2	5.74	465.3	9.36	454.2	5.74	218.96	317.11
X6117	0.07234	0.00158	1.65881	0.03535	0.1663	0.00187	0.04902	0.00092	995.6	43.83	992.9	13.5	991.7	10.33	967.3	17.7	991.7	10.33	143.08	399.98
X6118	0.05678	0.0025	0.32863	0.0141	0.04198	0.00058	0.01389	0.00027	482.3	94.94	288.5	10.78	265.1	3.61	278.9	5.44	265.1	3.61	354.12	367.97
X6119	0.06812	0.00228	1.26463	0.04121	0.13465	0.00175	0.04547	0.00107	872.1	67.82	830	18.48	814.3	9.93	898.8	20.78	814.3	9.93	107.2	252.6
X6120	0.05916	0.00474	0.55076	0.04302	0.06752	0.00145	0.03062	0.00302	572.9	165.35	445.5	28.17	421.2	8.73	609.6	59.27	421.2	8.73	27.26	309.91
X6121	0.05906	0.00212	0.63633	0.02224	0.07815	0.00101	0.02489	0.00058	569.2	76.12	500	13.8	485.1	6.02	497	11.37	485.1	6.02	194.98	384.84
X6123	0.0566	0.00282	0.53874	0.02618	0.06903	0.00104	0.02812	0.00079	475.3	107.19	437.6	17.28	430.3	6.28	560.5	15.48	430.3	6.28	116.94	262.97
X6124	0.05645	0.00223	0.54108	0.02087	0.06952	0.00093	0.0268	0.00091	469.2	85.94	439.1	13.75	433.3	5.6	534.6	17.84	433.3	5.6	60.62	295.82
X6125	0.06732	0.00174	1.42695	0.03599	0.15374	0.0018	0.04389	0.00093	847.6	52.86	900.3	15.06	921.9	10.04	868.3	18.03	921.9	10.04	101.56	288.49
X6126	0.10215	0.00257	4.13817	0.10098	0.2938	0.00372	0.0858	0.00215	1663.6	45.86	1661.9	19.96	1660.5	18.54	1663.8	40.1	1663.6	45.86	62.63	184.98
X6127	0.06075	0.00195	0.76067	0.02375	0.09082	0.00112	0.03295	0.00089	630.3	67.51	574.4	13.7	560.4	6.65	655.3	17.46	560.4	6.65	97.46	414.36
X6128	0.05757	0.00254	0.58295	0.02508	0.07344	0.00104	0.02176	0.0006	512.9	94.34	466.4	16.09	456.9	6.22	435	11.96	456.9	6.22	118.43	228.54
X6129	0.05557	0.00165	0.58339	0.0169	0.07614	0.0009	0.02341	0.00041	434.8	64.45	466.6	10.83	473.1	5.39	467.7	8	473.1	5.39	321.66	480.73
X6130	0.05865	0.00535	0.51832	0.04606	0.06409	0.00152	0.0219	0.00132	554.1	187.42	424	30.81	400.5	9.23	437.9	26.03	400.5	9.23	42.89	115.53
X6132	0.05457	0.00212	0.52554	0.01996	0.06984	0.00091	0.02201	0.00051	394.8	84.18	428.8	13.28	435.2	5.51	440	10.11	435.2	5.51	182.25	360.12
X6133	0.05594	0.00268	0.52607	0.02458	0.0682	0.001	0.02251	0.00063	449.8	103.24	429.2	16.36	425.3	6.04	450	12.54	425.3	6.04	123.26	246.49
X6134	0.06852	0.00235	1.43229	0.04796	0.15159	0.00199	0.04653	0.00108	884.5	69.45	902.5	20.02	909.9	11.16	919.3	20.82	909.9	11.16	72.6	138.93
X6135	0.05507	0.00244	0.49051	0.02122	0.0646	0.00091	0.02019	0.00039	414.8	95.79	405.3	14.45	403.6	5.5	403.9	7.77	403.6	5.5	408.57	369.08
X6136	0.09517	0.00279	3.26224	0.09282	0.24859	0.00333	0.07386	0.0013	1531.5	54.29	1472.1	22.11	1431.2	17.18	1440.2	24.39	1531.5	54.29	163.8	144.39
X6137	0.08141	0.00311	2.35504	0.08743	0.20979	0.00311	0.07134	0.00226	1231.4	73.14	1229.1	26.46	1227.7	16.58	1392.9	42.61	1231.4	73.14	103.92	289.23
X6138	0.07873	0.00226	2.14911	0.05993	0.19798	0.0025	0.06041	0.00108	1165.3	55.8	1164.8	19.32	1164.5	13.46	1185.5	20.56	1165.3	55.8	132.19	161.15
X6139	0.05909	0.00226	0.57134	0.0213	0.07012	0.00093	0.02293	0.00047	570.5	81.12	458.9	13.76	436.9	5.63	458.2	9.34	436.9	5.63	360.33	491.81
X6140	0.05594	0.00172	0.54371	0.01636	0.0705	0.00084	0.03059	0.00099	449.5	67.02	440.9	10.76	439.1	5.07	609	19.4	439.1	5.07	59.19	473.6
X6141	0.06942	0.00141	1.47165	0.02919	0.15375	0.00168	0.04586	0.00069	911.2	41.3	918.8	11.99	921.9	9.41	906.3	13.28	921.9	9.41	295.87	536.26
X6142	0.05536	0.00366	0.52202	0.03372	0.06838	0.00121	0.02105	0.0007	426.7	141.17	426.5	22.49	426.4	7.28	421.1	13.88	426.4	7.28	72.1	110.16
X6143	0.04718	0.00551	0.24747	0.02852	0.03804	0.00084	0.01019	0.00079	58.1	257.59	224.5	23.21	240.7	5.21	204.9	15.79	240.7	5.21	40.57	96.46
X6144	0.07389	0.00249	1.78221	0.05853	0.17492	0.00235	0.05806	0.00152	1038.5	66.7	1039	21.36	1039.2	12.88	1140.6	29.04	1038.5	66.7	97.09	253.92
X6145	0.0749	0.00183	1.87216	0.04453	0.18127	0.00212	0.05834	0.00156	1065.9	48.35	1071.3	15.74	1073.9	11.59	1146.1	29.74	1065.9	48.35	55.65	275.72
X6146	0.12094	0.00182	6.00121	0.088	0.35986	0.00385	0.10657	0.00143	1970.2	26.58	1976	12.76	1981.5	18.27	2046.7	26.03	1970.2	26.58	172.2	284.67
X6147	0.05778	0.00182	0.5886	0.01812	0.07388	0.0009	0.03267	0.00137	521.3	67.96	470	11.58	459.5	5.39	649.7	26.85	459.5	5.39	41.46	626.05
X6148	0.05567	0.00334	0.54549	0.032	0.07106	0.00116	0.02127	0.00089	439.1	128.42	442	21.02	442.5	7	425.5	17.66	442.5	7	47.2	122.32
X6149	0.05814	0.00155	0.58685	0.01525	0.0732	0.00084	0.02506	0.00051	534.5	58.33	468.9	9.76	455.4	5.06	500.2	10.15	455.4	5.06	245.52	782.92
X6150	0.11309	0.00183	5.16421	0.0813	0.33117	0.0036	0.09588	0.00141	1849.7	28.96	1846.7	13.39	1844	17.43	1850.6	26.03	1849.7	28.96	153.09	301.27
XSG_50.1 Ma
X7001	0.06965	0.0021	1.42382	0.04151	0.14832	0.00178	0.04635	0.00066	918.1	60.81	899	17.39	891.6	10.01	915.7	12.67	891.6	10.01	171.15	123.32
X7002	0.06949	0.00201	1.43706	0.0401	0.15004	0.00177	0.04399	0.00109	913.4	58.33	904.5	16.71	901.2	9.92	870.1	21.06	901.2	9.92	48.62	154.91
X7003	0.05201	0.00211	0.29213	0.01151	0.04075	0.00052	0.01821	0.00078	285.9	89.83	260.2	9.05	257.5	3.19	364.8	15.54	257.5	3.19	25.25	272.2
X7004	0.06911	0.0015	1.43491	0.03004	0.15065	0.0016	0.04672	0.00063	902	44.25	903.6	12.53	904.6	8.94	923	12.15	904.6	8.94	157.13	206.66
X7005	0.05669	0.00146	0.62428	0.01554	0.0799	0.00086	0.02581	0.00038	478.8	56.08	492.5	9.72	495.5	5.15	515.1	7.53	495.5	5.15	262.37	404.77
X7006	0.07153	0.00304	1.53369	0.06328	0.15557	0.00227	0.04781	0.00109	972.6	84.14	944	25.36	932.1	12.68	943.9	20.96	932.1	12.68	49.72	57.68
X7007	0.07175	0.0017	1.51749	0.03463	0.15345	0.00168	0.0515	0.00083	978.9	47.56	937.5	13.97	920.3	9.4	1015.1	15.9	920.3	9.4	121.87	231.46
X7008	0.06864	0.00129	1.45286	0.02622	0.15357	0.00156	0.04759	0.00074	887.9	38.44	911.1	10.86	921	8.73	939.8	14.35	921	8.73	82.97	256.67
X7009	0.07048	0.00142	1.48601	0.02883	0.15298	0.00159	0.04502	0.00066	942.4	40.87	924.7	11.77	917.6	8.89	890	12.75	917.6	8.89	136.88	270.74
X7010	0.05882	0.00339	0.4794	0.02692	0.05914	0.00097	0.0203	0.00046	560.4	121.02	397.7	18.47	370.4	5.89	406.2	9.17	370.4	5.89	137.81	118.47
X7011	0.07015	0.00172	1.50511	0.03549	0.15567	0.00172	0.04836	0.00097	932.7	49.39	932.5	14.38	932.7	9.61	954.6	18.72	932.7	9.61	68.37	207.37
X7012	0.15956	0.0021	9.79087	0.1209	0.4452	0.00443	0.12709	0.00138	2451	22.07	2415.3	11.38	2373.9	19.78	2418.2	24.75	2451	22.07	243.06	281.02
X7013	0.06759	0.00194	1.36099	0.03769	0.14608	0.00171	0.04247	0.00075	856.1	58.35	872.3	16.21	879	9.61	840.6	14.53	879	9.61	99.52	148.65
X7014	0.07001	0.00126	1.41975	0.02455	0.14713	0.00149	0.04759	0.00097	928.7	36.66	897.3	10.3	884.8	8.35	939.8	18.78	884.8	8.35	63.81	469.97
X7015	0.07079	0.00176	1.54864	0.0371	0.15872	0.00177	0.04746	0.00081	951.4	50	950	14.78	949.7	9.85	937.2	15.68	949.7	9.85	100.92	190.6
X7016	0.07067	0.00214	1.52981	0.04488	0.15705	0.00191	0.05012	0.00079	948	60.88	942.4	18.01	940.3	10.62	988.5	15.12	940.3	10.62	120.83	120.33
X7017	0.07346	0.00233	1.73284	0.05316	0.17113	0.00215	0.05699	0.00111	1026.8	62.86	1020.8	19.75	1018.4	11.83	1120.2	21.25	1026.8	62.86	103.48	164.09
X7018	0.04968	0.00189	0.24138	0.00892	0.03525	0.00043	0.01117	0.00019	180.1	86.16	219.6	7.3	223.3	2.69	224.6	3.74	223.3	2.69	435.44	454.67
X7019	0.09012	0.0015	3.11169	0.04939	0.25049	0.00255	0.06971	0.00115	1428.1	31.43	1435.6	12.2	1441	13.15	1362.1	21.68	1428.1	31.43	51.08	184.88
X7020	0.07024	0.00167	1.54118	0.03532	0.1592	0.00175	0.04852	0.00073	935.2	47.99	947	14.11	952.3	9.72	957.6	14.11	952.3	9.72	157.05	238.95
X7021	0.05453	0.00441	0.51276	0.0405	0.06822	0.00139	0.01904	0.00065	393	171.9	420.3	27.19	425.4	8.39	381.2	12.85	425.4	8.39	50.34	47.84
X7022	0.06896	0.00174	1.47146	0.03584	0.15481	0.00173	0.04689	0.00073	897.5	51.19	918.7	14.73	927.9	9.67	926.2	14.17	927.9	9.67	150.51	221.61
X7023	0.05569	0.00148	0.55342	0.01428	0.07209	0.00079	0.02157	0.0004	439.9	57.97	447.2	9.33	448.7	4.74	431.4	7.89	448.7	4.74	175.75	445.62
X7024	0.05459	0.00137	0.54888	0.01331	0.07294	0.00078	0.03473	0.00196	395.5	54.87	444.3	8.72	453.9	4.69	690	38.2	453.9	4.69	10.04	543.03
X7025	0.08973	0.00169	3.0722	0.05549	0.2484	0.00263	0.07531	0.00104	1419.6	35.58	1425.8	13.83	1430.2	13.57	1467.6	19.54	1419.6	35.58	99.08	162.79
X7026	0.11085	0.00162	5.00166	0.06949	0.32734	0.00329	0.0872	0.00111	1813.4	26.36	1819.6	11.76	1825.5	15.97	1689.8	20.69	1813.4	26.36	417.05	849.47
X7028	0.10522	0.0015	4.43333	0.05988	0.30566	0.00304	0.08622	0.00142	1718.2	25.95	1718.6	11.19	1719.3	14.99	1671.6	26.49	1718.2	25.95	46.87	255.05
X7029	0.08456	0.0021	2.65449	0.06362	0.22774	0.00265	0.06989	0.00125	1305.3	47.63	1315.9	17.68	1322.7	13.92	1365.5	23.57	1305.3	47.63	62.24	112.06
X7030	0.06903	0.00198	1.47582	0.0409	0.15509	0.00183	0.04608	0.00083	899.7	57.97	920.5	16.77	929.4	10.22	910.6	16	929.4	10.22	110.54	176.1
X7031	0.07724	0.00248	1.98125	0.06142	0.18609	0.00239	0.05842	0.00087	1127.3	62.56	1109.1	20.92	1100.2	12.96	1147.6	16.64	1127.3	62.56	185.11	128.97
X7032	0.10522	0.00214	4.43822	0.08665	0.306	0.00342	0.08793	0.00123	1718.2	36.96	1719.5	16.18	1721	16.9	1703.5	22.8	1718.2	36.96	68.87	77.85
X7033	0.0695	0.00156	1.46419	0.03179	0.15283	0.00165	0.04243	0.00062	913.7	45.65	915.7	13.1	916.8	9.22	839.8	11.99	916.8	9.22	183.78	271.99
X7034	0.06858	0.00152	1.43248	0.03068	0.15152	0.00163	0.04545	0.00065	886.2	45.23	902.6	12.81	909.5	9.11	898.3	12.48	909.5	9.11	132.3	203.5
X7035	0.07073	0.00156	1.53452	0.03257	0.15739	0.00169	0.04815	0.00084	949.5	44.42	944.3	13.05	942.3	9.42	950.5	16.21	942.3	9.42	83.4	234.62
X7036	0.06404	0.00186	1.02144	0.02868	0.11571	0.00135	0.04321	0.00083	742.9	60.13	714.6	14.41	705.8	7.79	855	16.16	705.8	7.79	103.67	257.41
X7037	0.06921	0.00187	1.44307	0.03768	0.15124	0.00174	0.04399	0.00077	905.1	54.63	907	15.66	907.9	9.76	870.2	14.91	907.9	9.76	95.17	161.95
X7038	0.06995	0.0015	1.45334	0.02999	0.15072	0.0016	0.04512	0.00062	926.8	43.36	911.3	12.41	905	8.99	892	11.9	905	8.99	180.87	268.87
X7039	0.07009	0.00159	1.50206	0.03299	0.15546	0.00169	0.04586	0.00072	931	46.01	931.2	13.39	931.5	9.42	906.2	13.92	931.5	9.42	105.79	202.33
X7040	0.08539	0.00216	2.6762	0.06534	0.22733	0.00267	0.07331	0.00161	1324.4	48.31	1321.9	18.05	1320.5	14.04	1430.1	30.24	1324.4	48.31	28.06	85.49
X7041	0.05841	0.00165	0.63606	0.01744	0.079	0.00089	0.02461	0.0004	545	60.61	499.9	10.82	490.1	5.33	491.5	7.85	490.1	5.33	178.71	283.59
X7042	0.06956	0.0016	1.46188	0.03237	0.15245	0.00166	0.0453	0.0006	915.4	46.49	914.8	13.35	914.7	9.29	895.5	11.64	914.7	9.29	173.1	193.83
X7043	0.06952	0.00112	1.48831	0.02303	0.15529	0.00155	0.04439	0.00096	914.2	32.88	925.6	9.4	930.6	8.62	878	18.6	930.6	8.62	44.12	492.3
X7044	0.09436	0.00117	3.43147	0.0404	0.26378	0.00254	0.07653	0.00134	1515.3	23.28	1511.6	9.26	1509.2	12.97	1490.5	25.12	1515.3	23.28	43.38	649.31
X7045	0.05821	0.00128	0.61117	0.01301	0.07616	0.0008	0.02282	0.00031	537	48.05	484.3	8.2	473.2	4.78	456.1	6.08	473.2	4.78	300.54	494.78
X7046	0.06969	0.00141	1.53797	0.03003	0.16009	0.00168	0.0598	0.00095	919.1	41.11	945.7	12.01	957.3	9.35	1174	18.12	957.3	9.35	78.2	260.29
X7047	0.05606	0.00147	0.62073	0.01575	0.08032	0.00088	0.02495	0.00036	454.3	57.01	490.3	9.87	498	5.25	498.2	7.05	498	5.25	215.29	305.44
X7048	0.05169	0.00329	0.2696	0.01675	0.03783	0.00062	0.01144	0.00026	271.5	139.47	242.4	13.4	239.4	3.84	229.9	5.25	239.4	3.84	156.6	130.33
X7049	0.06986	0.00182	1.44884	0.03654	0.15043	0.00172	0.04645	0.0008	924.1	52.65	909.4	15.15	903.4	9.62	917.6	15.42	903.4	9.62	76.81	143.44
X7050	0.06844	0.0016	1.3955	0.03149	0.14789	0.00162	0.04308	0.00059	882	47.54	887	13.35	889.1	9.08	852.6	11.4	889.1	9.08	142.48	173.45
X7051	0.05363	0.00177	0.28151	0.00905	0.03807	0.00045	0.01152	0.00016	355.5	72.75	251.9	7.17	240.9	2.77	231.5	3.26	240.9	2.77	505.08	430.03
X7052	0.07	0.00144	1.4792	0.02927	0.15327	0.00162	0.04705	0.00062	928.3	41.57	921.9	11.99	919.3	9.06	929.4	12.05	919.3	9.06	148.74	233.53
X7053	0.07287	0.00142	1.68439	0.0316	0.16764	0.00176	0.04786	0.00079	1010.5	38.99	1002.6	11.95	999.1	9.69	944.9	15.15	999.1	9.69	113.15	346.83
X7054	0.07571	0.00184	1.9133	0.04498	0.1833	0.00207	0.05612	0.00097	1087.3	48.01	1085.7	15.68	1085	11.3	1103.7	18.62	1087.3	48.01	62.27	128.8
X7055	0.07248	0.00186	1.62484	0.04032	0.16259	0.00186	0.04836	0.00077	999.4	51.25	979.9	15.6	971.2	10.33	954.6	14.9	971.2	10.33	116.26	173.02
X7056	0.05241	0.00102	0.32485	0.00613	0.04495	0.00045	0.01408	0.00024	303.4	43.78	285.6	4.7	283.5	2.8	282.5	4.87	283.5	2.8	213.03	1178.9
X7057	0.07118	0.00189	1.52358	0.03909	0.15524	0.00179	0.04634	0.00081	962.6	53.22	939.9	15.73	930.3	10.02	915.6	15.59	930.3	10.02	112.32	193.66
X7058	0.07749	0.00166	2.04043	0.04218	0.19097	0.00208	0.05681	0.0011	1134	41.97	1129.1	14.09	1126.6	11.25	1116.8	21.1	1134	41.97	46.78	168.7
X7059	0.07341	0.00189	1.66241	0.04138	0.16425	0.00189	0.0521	0.00091	1025.2	51.2	994.3	15.78	980.3	10.45	1026.5	17.55	980.3	10.45	79.79	156.91
X7060	0.05352	0.00214	0.31765	0.0124	0.04305	0.00055	0.01405	0.00031	350.7	87.82	280.1	9.55	271.7	3.4	282.1	6.18	271.7	3.4	124.76	241.34
X7061	0.05844	0.00215	0.54895	0.01962	0.06813	0.00086	0.02015	0.00049	546.1	78.29	444.3	12.86	424.9	5.18	403.3	9.65	424.9	5.18	61.68	144.35
X7062	0.09089	0.00154	3.12179	0.05078	0.24909	0.00258	0.07003	0.00088	1444.2	31.93	1438.1	12.51	1433.8	13.34	1368.1	16.65	1444.2	31.93	120.29	195.87
X7063	0.06961	0.00137	1.51482	0.02871	0.15781	0.00165	0.04488	0.00064	916.9	39.87	936.4	11.59	944.6	9.2	887.4	12.43	944.6	9.2	117.56	255.09
X7064	0.08052	0.00161	2.26759	0.0437	0.20424	0.00219	0.0361	0.00051	1209.6	38.85	1202.3	13.58	1198.1	11.72	716.7	9.87	1209.6	38.85	146.91	156.2
X7065	0.07026	0.00132	1.54062	0.02787	0.15901	0.00165	0.04631	0.00067	936	38	946.8	11.14	951.3	9.17	915.1	12.9	951.3	9.17	137.13	346.32
X7066	0.07066	0.00137	1.59967	0.02991	0.16417	0.00172	0.04737	0.00073	947.7	39.52	970.1	11.68	979.9	9.52	935.4	14.01	979.9	9.52	98.33	266.81
X7067	0.0698	0.00163	1.49158	0.03371	0.15497	0.00171	0.04534	0.00081	922.4	47.27	927	13.74	928.8	9.54	896.3	15.7	928.8	9.54	66.44	174.71
X7068	0.06997	0.00143	1.48748	0.0293	0.15416	0.00163	0.04654	0.00085	927.5	41.32	925.3	11.96	924.2	9.12	919.4	16.48	924.2	9.12	59.21	228.83
X7069	0.0928	0.00226	3.25729	0.07643	0.25452	0.00301	0.07115	0.00121	1483.8	45.49	1470.9	18.23	1461.7	15.47	1389.2	22.81	1483.8	45.49	55.65	81.31
X7070	0.05126	0.00493	0.33143	0.03131	0.04689	0.00096	0.01341	0.00066	252.4	206.43	290.7	23.88	295.4	5.92	269.2	13.12	295.4	5.92	29.12	49.28
X7071	0.05456	0.00119	0.50053	0.01061	0.06652	0.0007	0.01898	0.00024	394.3	48.02	412.1	7.18	415.2	4.21	380	4.83	415.2	4.21	390.9	572.93
X7072	0.05163	0.00303	0.27578	0.01583	0.03873	0.0006	0.01094	0.0003	269.1	129.34	247.3	12.6	245	3.73	220	6.04	245	3.73	100.56	128.65
X7073	0.08953	0.00183	3.04148	0.05999	0.24633	0.00271	0.06985	0.00109	1415.4	38.56	1418.1	15.07	1419.5	14.04	1364.7	20.57	1415.4	38.56	84.69	163.47
X7074	0.07075	0.00135	1.54224	0.0284	0.15807	0.00165	0.04508	0.00064	950.1	38.53	947.4	11.34	946	9.19	891.2	12.35	946	9.19	117.38	268.85
X7075	0.06901	0.00146	1.40319	0.02878	0.14743	0.00158	0.04363	0.00055	899.1	43.12	890.3	12.16	886.5	8.88	863.2	10.63	886.5	8.88	173.22	216.05
X7076	0.05518	0.00171	0.47815	0.01442	0.06283	0.00073	0.01846	0.00033	419.2	67.24	396.8	9.9	392.8	4.44	369.7	6.51	392.8	4.44	141.48	250.76
X7077	0.07228	0.00198	1.32189	0.03499	0.13261	0.00156	0.03361	0.00084	993.7	54.6	855.3	15.3	802.7	8.88	668.1	16.4	802.7	8.88	94.41	318.82
X7078	0.05899	0.00125	0.61979	0.01277	0.07618	0.0008	0.03662	0.00077	566.9	45.63	489.7	8	473.3	4.79	727	14.98	473.3	4.79	44.44	431.9
X7079	0.07088	0.00156	1.54935	0.03292	0.15848	0.00173	0.0453	0.00072	954	44.26	950.2	13.11	948.3	9.6	895.6	13.86	948.3	9.6	107.31	233.01
X7080	0.05579	0.00285	0.48741	0.02431	0.06334	0.00095	0.01552	0.00048	443.8	110.16	403.1	16.6	395.9	5.74	311.3	9.62	395.9	5.74	57.5	94.66
X7081	0.07626	0.00173	1.95362	0.04286	0.18573	0.00207	0.0533	0.00094	1102	44.69	1099.7	14.74	1098.2	11.25	1049.6	18.07	1102	44.69	67.73	166.82
X7082	0.05719	0.00155	0.59917	0.01583	0.07596	0.00085	0.02275	0.00035	498.4	59.3	476.7	10.05	472	5.11	454.7	6.84	472	5.11	189.29	287.06
X7083	0.07714	0.00208	2.02727	0.05303	0.19053	0.00227	0.05719	0.00118	1124.8	52.88	1124.7	17.79	1124.3	12.3	1124.1	22.57	1124.8	52.88	33.76	84.41
X7084	0.06915	0.00153	1.44322	0.03087	0.15131	0.00164	0.04404	0.00065	903.3	44.85	907.1	12.83	908.3	9.21	871.1	12.64	908.3	9.21	96.82	181.5
X7085	0.0747	0.00117	1.61462	0.0244	0.1567	0.00158	0.04498	0.00055	1060.4	31.23	975.9	9.48	938.4	8.81	889.4	10.67	938.4	8.81	259.16	658.62
X7086	0.1159	0.00261	5.32567	0.11556	0.33311	0.00402	0.10222	0.00202	1894	39.95	1873	18.55	1853.5	19.46	1967.2	37.09	1894	39.95	105.27	243.91
X7087	0.05529	0.00154	0.49925	0.01352	0.06546	0.00074	0.01813	0.0003	423.9	60.42	411.2	9.15	408.7	4.46	363.1	5.88	408.7	4.46	183.87	306.5
X7088	0.07049	0.00133	1.5516	0.02828	0.15957	0.00167	0.04739	0.00056	942.7	38.12	951.1	11.26	954.4	9.28	935.8	10.89	954.4	9.28	171.4	235.78
X7089	0.0508	0.0039	0.25932	0.01948	0.037	0.0007	0.01032	0.0003	232	168.14	234.1	15.71	234.2	4.36	207.5	6.01	234.2	4.36	104.96	90.8
X7090	0.0694	0.00172	1.44637	0.03524	0.15101	0.00184	0.04849	0.00115	910.5	50.08	908.4	14.63	906.6	10.3	957.1	22.12	906.6	10.3	67.09	294.04
X7092	0.07332	0.00155	1.51793	0.0317	0.15002	0.00176	0.04626	0.00092	1022.7	42.16	937.6	12.78	901.1	9.87	914	17.69	901.1	9.87	216.38	782.57
X7093	0.05625	0.00206	0.56545	0.02034	0.07285	0.00097	0.02211	0.00058	461.3	79.31	455.1	13.2	453.3	5.82	442	11.51	453.3	5.82	105.97	298.67
X7094	0.0691	0.00161	1.47663	0.03391	0.15486	0.00185	0.04571	0.00076	901.7	47.25	920.8	13.9	928.1	10.33	903.4	14.62	928.1	10.33	197.23	337.8
X7095	0.07481	0.00167	1.61362	0.03545	0.1563	0.00186	0.05254	0.0009	1063.5	44.17	975.5	13.77	936.2	10.37	1035	17.22	936.2	10.37	161.62	357.5
X7097	0.07141	0.0015	1.48966	0.03088	0.1512	0.00176	0.04486	0.00065	969.1	42.23	926.2	12.59	907.7	9.84	886.9	12.65	907.7	9.84	356.36	492.03
X7098	0.05185	0.0037	0.27394	0.01916	0.0383	0.00069	0.01118	0.00037	278.7	155.17	245.8	15.27	242.3	4.27	224.8	7.34	242.3	4.27	129.71	180.03
X7099	0.06999	0.00168	1.51083	0.03579	0.15647	0.00188	0.04547	0.00093	928.1	48.65	934.8	14.47	937.1	10.49	898.7	18.02	937.1	10.49	90.64	254.85
X7100	0.07577	0.0018	1.91704	0.04476	0.18341	0.00222	0.0543	0.00091	1088.9	46.85	1087	15.58	1085.6	12.09	1068.7	17.49	1088.9	46.85	142.29	228.67
X7101	0.07083	0.00228	1.46465	0.0462	0.1499	0.002	0.04574	0.00092	952.5	64.57	915.9	19.03	900.4	11.2	904	17.86	900.4	11.2	117.61	174.16
X7102	0.09565	0.00161	3.56524	0.05973	0.2702	0.00307	0.08013	0.00117	1541	31.4	1541.8	13.28	1541.8	15.56	1557.9	21.95	1541	31.4	159.77	301.24
X7103	0.05434	0.00145	0.51805	0.01365	0.06911	0.00082	0.01985	0.00068	385.2	58.76	423.8	9.13	430.8	4.95	397.3	13.38	430.8	4.95	78.24	640.14
X7104	0.07166	0.0024	1.49902	0.04915	0.15166	0.00206	0.05112	0.00126	976.4	66.9	930	19.97	910.3	11.54	1007.8	24.15	910.3	11.54	75.06	184.55
X7105	0.07217	0.00246	1.54852	0.05162	0.15558	0.00214	0.04668	0.00085	990.7	67.56	949.9	20.57	932.2	11.91	922.2	16.42	932.2	11.91	160.94	154.3
X7106	0.07034	0.00163	1.50967	0.03438	0.15562	0.00184	0.0473	0.00083	938.2	46.73	934.3	13.91	932.4	10.26	934.2	16.02	932.4	10.26	140.06	294.95
X7107	0.06903	0.00182	1.49762	0.03883	0.15731	0.00193	0.04815	0.00084	899.6	53.54	929.4	15.79	941.8	10.76	950.4	16.2	941.8	10.76	147.82	235.94
X7108	0.05501	0.00213	0.53926	0.02046	0.07108	0.00096	0.01926	0.00058	412.7	83.75	437.9	13.49	442.7	5.76	385.6	11.59	442.7	5.76	97.67	300.7
X7109	0.07753	0.00268	2.00357	0.06755	0.18743	0.00264	0.05475	0.00144	1134.5	67.51	1116.7	22.84	1107.4	14.34	1077.4	27.5	1134.5	67.51	74.22	152.03
X7110	0.0574	0.00207	0.56877	0.02005	0.07187	0.00095	0.02178	0.00052	506.3	77.76	457.2	12.98	447.4	5.72	435.5	10.33	447.4	5.72	165.19	360.41
X7111	0.05597	0.0015	0.52968	0.0139	0.06864	0.00081	0.02028	0.00036	450.8	58.22	431.6	9.23	428	4.91	405.7	7.11	428	4.91	302.17	584.75
X7112	0.0704	0.00213	1.46674	0.04338	0.15111	0.00195	0.04032	0.00076	940	60.79	916.8	17.85	907.2	10.94	798.9	14.83	907.2	10.94	183.42	238.48
X7113	0.06985	0.00186	1.53167	0.04003	0.15905	0.00196	0.04531	0.00082	923.9	53.87	943.2	16.06	951.5	10.89	895.7	15.95	951.5	10.89	138.94	231.17
X7114	0.0693	0.00163	1.55131	0.03579	0.16236	0.00192	0.05034	0.0012	907.8	47.66	951	14.24	969.9	10.63	992.7	23.02	969.9	10.63	70.28	339.74
X7115	0.05395	0.00198	0.51402	0.01844	0.06911	0.0009	0.02187	0.00053	369	80.24	421.1	12.37	430.8	5.45	437.4	10.41	430.8	5.45	162.65	382.8
X7116	0.06949	0.00195	1.50324	0.04121	0.15693	0.00196	0.04759	0.00097	913.3	56.61	931.7	16.71	939.7	10.93	939.7	18.74	939.7	10.93	95.21	207.25
X7117	0.09173	0.00147	3.28402	0.05213	0.2597	0.00286	0.07195	0.00107	1461.8	30.33	1477.3	12.36	1488.3	14.65	1404.3	20.16	1461.8	30.33	146.97	360.91
X7118	0.09711	0.00254	3.68679	0.09405	0.27543	0.0036	0.0768	0.00142	1569.3	48.25	1568.5	20.38	1568.3	18.19	1495.5	26.71	1569.3	48.25	76.69	97.27
X7119	0.05558	0.00498	0.34038	0.0298	0.04443	0.001	0.01463	0.00055	435.4	188.29	297.5	22.58	280.2	6.14	293.5	10.88	280.2	6.14	66.63	80.08
X7120	0.07079	0.00211	1.53558	0.04476	0.15737	0.00202	0.04935	0.00117	951.4	59.87	944.7	17.92	942.1	11.23	973.7	22.59	942.1	11.23	64.09	181.73
X7121	0.07213	0.00263	1.49272	0.053	0.15017	0.00212	0.04157	0.00081	989.5	72.42	927.4	21.59	901.9	11.86	823.3	15.77	901.9	11.86	174.79	169.04
X7122	0.0696	0.0021	1.5248	0.04502	0.15897	0.00204	0.04484	0.00081	916.5	60.96	940.4	18.11	951	11.32	886.6	15.65	951	11.32	149.91	183.8
X7123	0.08657	0.00328	2.79913	0.10322	0.23461	0.00358	0.06521	0.00239	1351	71.39	1355.3	27.59	1358.6	18.69	1276.9	45.39	1351	71.39	28.11	92.12
X7124	0.05338	0.00458	0.32757	0.02747	0.04453	0.00097	0.01142	0.00044	344.9	183.06	287.7	21.01	280.8	5.98	229.6	8.86	280.8	5.98	222.63	228.83
X7125	0.0824	0.00286	2.4526	0.08268	0.21599	0.00309	0.06525	0.00148	1255	66.23	1258.2	24.31	1260.7	16.41	1277.5	28.06	1255	66.23	118.32	173.22
X7126	0.05518	0.00147	0.50762	0.01329	0.06676	0.00078	0.02047	0.00031	419.3	58.01	416.8	8.95	416.6	4.72	409.5	6.06	416.6	4.72	471.46	597.11
X7128	0.07071	0.00239	1.58195	0.05224	0.16237	0.00218	0.0498	0.00107	948.9	67.79	963.1	20.54	969.9	12.11	982.4	20.69	969.9	12.11	82.43	137.7
X7129	0.07083	0.00191	1.56706	0.04123	0.16056	0.00196	0.04735	0.00085	952.6	54.14	957.3	16.31	959.9	10.9	935	16.48	959.9	10.9	128.2	212.82
X7130	0.0513	0.00297	0.2863	0.01621	0.0405	0.00064	0.01414	0.00075	254.3	127.65	255.6	12.8	256	3.97	283.7	14.9	256	3.97	37.82	215.9
X7131	0.07064	0.002	1.56603	0.04324	0.1609	0.002	0.04707	0.00068	947	56.86	956.9	17.11	961.8	11.12	929.8	13.14	961.8	11.12	265.84	195.28
X7132	0.05533	0.00196	0.51351	0.01782	0.06736	0.00086	0.02184	0.00038	425.4	76.95	420.8	11.95	420.2	5.22	436.6	7.56	420.2	5.22	273.4	325.98
X7133	0.05589	0.00465	0.51214	0.04166	0.06651	0.00138	0.01896	0.00089	447.6	175.1	419.9	27.98	415.1	8.35	379.7	17.72	415.1	8.35	37.78	78.72
X7134	0.08421	0.00162	2.51199	0.04733	0.21654	0.00244	0.05866	0.00081	1297.3	37.08	1275.5	13.68	1263.5	12.91	1152.2	15.42	1297.3	37.08	262.85	321.6
X7135	0.05423	0.00121	0.51452	0.01124	0.06888	0.00076	0.02061	0.00038	380.3	49.22	421.5	7.53	429.4	4.59	412.4	7.5	429.4	4.59	264.68	987.23
X7136	0.06843	0.00197	1.48829	0.04187	0.15788	0.00197	0.04603	0.00094	881.6	58.55	925.6	17.09	945	10.98	909.6	18.11	945	10.98	103.18	199.86
X7137	0.07021	0.00216	1.5188	0.04556	0.15704	0.00201	0.04609	0.00089	934.5	61.9	938	18.37	940.3	11.22	910.7	17.29	940.3	11.22	105.13	159.37
X7138	0.06845	0.00167	1.4497	0.03446	0.15375	0.00179	0.04333	0.0011	882.2	49.54	909.7	14.28	921.9	10.02	857.3	21.37	921.9	10.02	56.54	279.28
X7139	0.07798	0.0014	2.0862	0.03664	0.19422	0.00212	0.05214	0.00116	1146.4	35.3	1144.3	12.06	1144.2	11.45	1027.2	22.34	1146.4	35.3	60.15	401.46
X7140	0.07105	0.00204	1.51285	0.04223	0.15458	0.00192	0.04726	0.00087	958.9	57.47	935.6	17.06	926.6	10.72	933.4	16.88	926.6	10.72	101.07	161.44
X7141	0.07007	0.00141	1.51136	0.02972	0.1566	0.00173	0.04821	0.00104	930.3	40.79	935	12.02	937.9	9.67	951.7	20.12	937.9	9.67	63.96	379.79
X7142	0.07379	0.00577	1.77023	0.1347	0.17418	0.00407	0.03727	0.00426	1035.7	150.3	1034.6	49.37	1035.1	22.34	739.7	83.1	1035.1	22.34	5.88	17.8
X7143	0.05732	0.00118	0.52683	0.01059	0.06673	0.00072	0.01975	0.00027	503.2	45.1	429.7	7.04	416.5	4.38	395.3	5.4	416.5	4.38	563.18	973.06
X7144	0.06848	0.00163	1.41987	0.03293	0.15053	0.00174	0.04274	0.00072	883.3	48.42	897.3	13.82	903.9	9.74	845.8	13.99	903.9	9.74	145.83	277.09
X7146	0.06962	0.00167	1.47569	0.03457	0.15391	0.00178	0.04393	0.00073	917.2	48.69	920.5	14.18	922.8	9.96	869.1	14.18	922.8	9.96	131.97	233.05
X7147	0.05566	0.00151	0.58133	0.01544	0.07584	0.00088	0.02272	0.00035	438.5	59.18	465.3	9.92	471.3	5.26	454.2	6.92	471.3	5.26	300.57	406.17
X7148	0.06843	0.00202	1.41886	0.04084	0.15056	0.00187	0.04188	0.00136	881.6	59.97	896.9	17.14	904.1	10.5	829.2	26.32	904.1	10.5	39.92	209.52
X7149	0.05539	0.00259	0.53063	0.02421	0.06957	0.001	0.02109	0.00053	427.7	100.79	432.2	16.06	433.5	6.03	421.8	10.44	433.5	6.03	105.31	160.47
X7150	0.069	0.00152	1.44051	0.03087	0.15159	0.0017	0.04298	0.00087	898.9	44.74	905.9	12.84	909.9	9.53	850.5	16.78	909.9	9.53	79.04	295.7
XSG_50.9 Ma
X8001	0.0682	0.00185	1.44543	0.0382	0.15367	0.00182	0.04995	0.00082	874.7	55.27	908	15.86	921.5	10.14	985.1	15.83	921.5	10.14	161.06	208.23
X8002	0.06959	0.00147	1.5269	0.03134	0.15909	0.00174	0.06055	0.00165	916.3	42.85	941.3	12.59	951.7	9.67	1188.2	31.39	951.7	9.67	37.59	352.73
X8003	0.0539	0.00216	0.52003	0.02035	0.06996	0.00092	0.02217	0.00052	366.6	87.68	425.2	13.6	435.9	5.54	443.2	10.23	435.9	5.54	150.59	273.08
X8004	0.05615	0.00163	0.61376	0.01738	0.07926	0.00092	0.0261	0.00045	457.9	63.32	485.9	10.94	491.7	5.51	520.7	8.86	491.7	5.51	311.08	481.94
X8005	0.05897	0.00149	0.52858	0.01303	0.065	0.00073	0.02188	0.00034	565.9	54.2	430.9	8.66	405.9	4.39	437.4	6.75	405.9	4.39	432.01	686.5
X8006	0.08731	0.00181	2.69707	0.05414	0.22398	0.00252	0.06852	0.00105	1367.4	39.32	1327.7	14.87	1302.9	13.26	1339.6	19.88	1367.4	39.32	370.75	538
X8007	0.05032	0.01524	0.27341	0.08207	0.0394	0.00172	0.01386	0.00104	209.9	582.69	245.4	65.44	249.1	10.64	278.2	20.75	249.1	10.64	22.75	24.8
X8008	0.08997	0.00229	3.04649	0.07524	0.24554	0.00301	0.08207	0.00188	1424.8	47.88	1419.4	18.88	1415.4	15.57	1594.2	35.05	1424.8	47.88	79.19	224.34
X8009	0.05198	0.0042	0.27227	0.02152	0.03798	0.00074	0.01176	0.00076	284.6	174.09	244.5	17.18	240.3	4.6	236.4	15.25	240.3	4.6	60.73	148.74
X8010	0.09087	0.00446	3.11444	0.14822	0.24852	0.00451	0.06526	0.00259	1443.8	90.86	1436.3	36.58	1430.8	23.27	1277.8	49.19	1443.8	90.86	40.95	66.06
X8011	0.05393	0.00213	0.56975	0.02205	0.0766	0.00099	0.02237	0.00057	368.1	86.55	457.9	14.26	475.8	5.92	447.3	11.19	475.8	5.92	138.28	273.98
X8012	0.06734	0.00157	1.42662	0.03234	0.15363	0.00172	0.04622	0.00086	848.2	47.7	900.1	13.53	921.3	9.61	913.2	16.59	921.3	9.61	147.49	368.2
X8013	0.088	0.00274	2.8742	0.08666	0.23683	0.00317	0.07602	0.00123	1382.6	58.48	1375.2	22.71	1370.2	16.54	1481	23.16	1382.6	58.48	125.26	90.92
X8014	0.05369	0.00177	0.46159	0.01486	0.06234	0.00076	0.01919	0.00035	358	72.65	385.4	10.33	389.8	4.59	384.2	6.88	389.8	4.59	502.31	706.6
X8015	0.06993	0.00228	1.46113	0.04629	0.15152	0.00194	0.0426	0.00084	926.2	65.49	914.5	19.1	909.5	10.87	843.2	16.29	909.5	10.87	147.47	185.82
X8016	0.07205	0.00184	1.60936	0.03992	0.16198	0.0019	0.05403	0.00105	987.5	50.94	973.9	15.53	967.8	10.52	1063.6	20.11	967.8	10.52	107.25	248.93
X8017	0.07289	0.00305	1.58124	0.0644	0.15732	0.00232	0.05177	0.00146	1010.8	82.64	962.9	25.33	941.9	12.91	1020.1	28.02	941.9	12.91	49.32	99.48
X8018	0.07405	0.00142	1.76142	0.03286	0.1725	0.00186	0.05026	0.00166	1042.8	38.25	1031.4	12.08	1025.9	10.21	991.2	31.96	1042.8	38.25	38.37	524.99
X8019	0.0549	0.00156	0.54506	0.01509	0.072	0.00083	0.02492	0.00056	408.1	61.56	441.8	9.92	448.2	4.99	497.6	10.99	448.2	4.99	159.97	623.23
X8020	0.07008	0.00121	1.49354	0.02515	0.15455	0.00162	0.04309	0.00066	930.7	35.13	927.8	10.24	926.4	9.03	852.7	12.82	926.4	9.03	277.4	818.68
X8021	0.05117	0.00299	0.27514	0.01574	0.03899	0.00061	0.01261	0.00037	248.5	129.18	246.8	12.54	246.6	3.81	253.4	7.35	246.6	3.81	175.29	282.97
X8022	0.06959	0.00166	1.50411	0.03492	0.15675	0.00178	0.04457	0.00069	916.3	48.33	932.1	14.16	938.7	9.92	881.3	13.39	938.7	9.92	246.2	346.65
X8023	0.057	0.00278	0.60829	0.02897	0.07739	0.00113	0.02497	0.00069	491.1	104.05	482.5	18.29	480.5	6.75	498.5	13.56	480.5	6.75	105.89	201.82
X8024	0.05536	0.00175	0.5164	0.01589	0.06764	0.00081	0.02119	0.00035	426.6	68.55	422.7	10.64	421.9	4.91	423.8	6.91	421.9	4.91	761.14	930.61
X8025	0.06999	0.0018	1.48621	0.03719	0.15399	0.0018	0.04421	0.00096	928.2	51.93	924.8	15.19	923.3	10.05	874.4	18.54	923.3	10.05	118.25	312.53
X8026	0.09867	0.00198	3.82209	0.07446	0.28092	0.00319	0.07902	0.00108	1599.2	37.02	1597.4	15.68	1596	16.06	1537.3	20.25	1599.2	37.02	227.66	228.06
X8027	0.06734	0.00196	1.42721	0.04051	0.15372	0.00187	0.04264	0.00106	848.2	59.44	900.4	16.95	921.8	10.43	843.9	20.52	921.8	10.43	76.2	235.89
X8028	0.07076	0.00238	1.37213	0.04489	0.14064	0.00185	0.03549	0.00092	950.4	67.4	877.1	19.21	848.3	10.44	704.8	17.98	848.3	10.44	260.62	567.74
X8029	0.06946	0.00272	1.46155	0.05563	0.15259	0.00217	0.05257	0.00244	912.6	78.53	914.6	22.95	915.5	12.11	1035.5	46.78	915.5	12.11	56.48	427.16
X8030	0.06782	0.00242	1.41226	0.04897	0.15102	0.00201	0.04406	0.00076	863.2	72.17	894.1	20.61	906.7	11.28	871.5	14.66	906.7	11.28	279.76	233.54
X8031	0.05629	0.00191	0.62067	0.02052	0.07996	0.00099	0.02447	0.00045	463.2	73.52	490.3	12.86	495.9	5.9	488.6	8.8	495.9	5.9	300.86	426.76
X8032	0.071	0.00277	1.54472	0.05862	0.1578	0.00224	0.04908	0.00105	957.3	77.78	948.4	23.39	944.5	12.5	968.3	20.14	944.5	12.5	106.58	128.57
X8033	0.07204	0.00223	1.56082	0.04698	0.15714	0.00199	0.04062	0.00087	987.3	61.43	954.8	18.63	940.9	11.08	804.7	16.82	940.9	11.08	121.58	203.71
X8034	0.05491	0.00491	0.48813	0.04269	0.06447	0.0014	0.02279	0.00094	408.5	188.41	403.6	29.13	402.8	8.46	455.4	18.51	402.8	8.46	54.05	89.64
X8035	0.0543	0.00213	0.55138	0.02112	0.07365	0.00096	0.02325	0.00056	383.2	85.12	445.9	13.82	458.1	5.78	464.6	11.11	458.1	5.78	167.64	377.71
X8036	0.06947	0.00127	1.47987	0.02627	0.15449	0.00164	0.05905	0.00135	912.8	37.06	922.2	10.76	926.1	9.14	1159.6	25.82	926.1	9.14	71.65	818.39
X8037	0.06101	0.00397	0.5839	0.03699	0.06941	0.00128	0.02342	0.00084	639.7	134.06	467	23.71	432.6	7.73	467.9	16.49	432.6	7.73	317.55	571.99
X8038	0.07494	0.00335	1.84533	0.08029	0.1786	0.0028	0.05351	0.00179	1066.9	87.41	1061.8	28.65	1059.3	15.3	1053.7	34.31	1066.9	87.41	44.38	104.91
X8039	0.11159	0.00285	5.07627	0.12549	0.32995	0.00426	0.08892	0.00198	1825.4	45.57	1832.1	20.97	1838.1	20.67	1721.9	36.81	1825.4	45.57	56.78	115.04
X8040	0.06831	0.00219	1.4407	0.04501	0.15297	0.00193	0.04683	0.00143	877.9	64.95	906	18.73	917.6	10.79	925	27.61	917.6	10.79	42.26	203.48
X8041	0.10865	0.00472	4.48486	0.18825	0.2994	0.00533	0.07669	0.00213	1776.8	77.21	1728.2	34.85	1688.3	26.45	1493.6	39.97	1776.8	77.21	96.77	99.13
X8042	0.07031	0.0033	1.54318	0.07064	0.1592	0.00249	0.04054	0.00116	937.3	93.47	947.8	28.21	952.3	13.84	803.3	22.56	952.3	13.84	68.87	101.51
X8043	0.09778	0.00348	3.7575	0.12969	0.27873	0.00418	0.07502	0.0016	1582.2	65.15	1583.7	27.68	1585	21.06	1462.1	30	1582.2	65.15	89.92	88.74
X8044	0.10825	0.00352	4.75191	0.14979	0.31838	0.00466	0.0845	0.00207	1770.2	58.3	1776.4	26.44	1781.8	22.77	1639.6	38.57	1770.2	58.3	49.01	71.6
X8045	0.09665	0.00444	3.68299	0.16406	0.27639	0.00493	0.08803	0.00291	1560.5	83.84	1567.7	35.57	1573.1	24.9	1705.2	54.01	1560.5	83.84	52.78	96.06
X8046	0.10607	0.0021	4.49616	0.08626	0.30745	0.00352	0.08797	0.00168	1732.9	35.74	1730.3	15.94	1728.2	17.35	1704.2	31.28	1732.9	35.74	100.97	300.88
X8047	0.05604	0.00385	0.49503	0.03321	0.06407	0.0012	0.01955	0.00078	453.7	146.13	408.3	22.55	400.3	7.29	391.3	15.41	400.3	7.29	224.6	448
X8048	0.07413	0.00237	1.59392	0.04964	0.15596	0.00202	0.05156	0.00114	1045	63.28	967.8	19.43	934.3	11.24	1016.3	21.89	934.3	11.24	84.29	190.24
X8049	0.06966	0.00151	1.49701	0.03168	0.15588	0.00173	0.04501	0.00077	918.3	44.01	929.2	12.88	933.8	9.64	889.8	14.84	933.8	9.64	193.55	525.76
X8050	0.05537	0.00201	0.63805	0.0226	0.08358	0.00106	0.0248	0.0005	427	78.67	501.1	14.01	517.5	6.31	495.2	9.77	517.5	6.31	240.14	407.03
X8051	0.06842	0.00194	1.49112	0.04112	0.15809	0.00191	0.04481	0.00109	881.2	57.46	926.8	16.76	946.1	10.65	886	21.08	946.1	10.65	83.36	282.12
X8052	0.05938	0.00424	0.58204	0.04059	0.0711	0.00137	0.01925	0.00068	581.1	148.06	465.8	26.05	442.8	8.26	385.3	13.52	442.8	8.26	126.58	161.82
X8053	0.05843	0.00181	0.61464	0.01856	0.0763	0.00092	0.02408	0.00043	545.8	66.25	486.5	11.67	474	5.53	480.9	8.49	474	5.53	814.2	1426.77
X8054	0.11562	0.00798	5.37324	0.35821	0.3371	0.00911	0.0956	0.00279	1889.5	119.22	1880.6	57.07	1872.7	43.9	1845.4	51.42	1889.5	119.22	41.8	19.39
X8055	0.05404	0.00356	0.54357	0.03512	0.07296	0.00125	0.02222	0.00078	372.5	141.86	440.8	23.1	454	7.54	444.3	15.38	454	7.54	66.13	135.98
X8057	0.07167	0.00272	1.61529	0.05965	0.16348	0.00228	0.05088	0.00136	976.6	75.4	976.2	23.16	976.1	12.63	1003.1	26.21	976.1	12.63	55.86	139.87
X8059	0.10018	0.00361	3.98814	0.13921	0.28876	0.00438	0.0754	0.00149	1627.5	65.47	1631.8	28.34	1635.3	21.9	1469.3	28.09	1627.5	65.47	77.96	64.61
X8060	0.06361	0.00441	1.04822	0.07101	0.11954	0.00232	0.04222	0.00178	728.5	140.58	728	35.2	727.9	13.38	835.8	34.57	727.9	13.38	38.61	99.19
X8061	0.06895	0.00194	1.45834	0.03997	0.15341	0.00185	0.04176	0.00095	897.3	56.93	913.3	16.51	920.1	10.33	827	18.39	920.1	10.33	89.23	269.86
X8062	0.05477	0.00452	0.33406	0.0269	0.04425	0.00094	0.01421	0.0006	402.7	174.96	292.7	20.48	279.1	5.81	285.2	11.94	279.1	5.81	227.56	406.97
X8063	0.07199	0.00162	1.59382	0.035	0.1606	0.00181	0.04167	0.0009	985.6	45.17	967.8	13.7	960.1	10.07	825.2	17.55	960.1	10.07	95.72	407.19
X8064	0.05672	0.00409	0.5066	0.03566	0.06479	0.00124	0.01605	0.00074	479.8	152.52	416.2	24.04	404.7	7.53	321.8	14.64	404.7	7.53	132.03	258.82
X8065	0.07246	0.0035	1.66214	0.07818	0.16639	0.00271	0.05028	0.00197	998.9	95.19	994.2	29.82	992.2	15	991.6	37.94	992.2	15	50.71	161.38
X8066	0.05762	0.00367	0.62747	0.03911	0.07899	0.00135	0.02274	0.00071	515	134.33	494.5	24.4	490.1	8.05	454.4	14.11	490.1	8.05	93.44	135.25
X8067	0.07	0.00219	1.5551	0.04747	0.16115	0.00203	0.04238	0.00083	928.3	62.95	952.5	18.86	963.2	11.26	838.9	16.18	963.2	11.26	123.93	204.83
X8068	0.05519	0.00186	0.54816	0.01806	0.07205	0.00088	0.01969	0.00063	419.7	73.06	443.8	11.84	448.5	5.32	394.2	12.57	448.5	5.32	91.82	517.32
X8069	0.06993	0.00202	1.50354	0.04242	0.15596	0.00192	0.04565	0.00085	926.4	58.35	931.8	17.21	934.3	10.68	902.3	16.45	934.3	10.68	140.45	260.8
X8070	0.05383	0.00566	0.30007	0.03098	0.04044	0.00093	0.01352	0.00068	363.8	221.35	266.5	24.2	255.5	5.78	271.4	13.6	255.5	5.78	50.68	100.44
X8071	0.09356	0.00197	3.33421	0.06834	0.25849	0.00297	0.06582	0.00114	1499.3	39.3	1489.1	16.01	1482.1	15.22	1288.4	21.57	1499.3	39.3	115.26	250.78
X8072	0.07207	0.00169	1.66507	0.03802	0.16758	0.00192	0.02225	0.0008	987.9	47.07	995.3	14.48	998.8	10.6	444.7	15.81	998.8	10.6	132.83	806.83
X8073	0.08088	0.0019	2.32312	0.05321	0.20836	0.00243	0.06206	0.00124	1218.5	45.59	1219.4	16.26	1220	12.99	1217	23.59	1218.5	45.59	122.6	338.61
X8074	0.05776	0.00143	0.54214	0.01315	0.06808	0.00076	0.02011	0.00035	520.5	53.81	439.8	8.66	424.6	4.61	402.4	7.02	424.6	4.61	380.9	947.65
X8075	0.07476	0.00194	1.7251	0.04352	0.16739	0.00199	0.05078	0.00095	1062	51.28	1017.9	16.22	997.7	10.99	1001.3	18.24	997.7	10.99	217.39	440.77
X8076	0.0711	0.00189	1.54622	0.04006	0.15775	0.00187	0.04441	0.00083	960.3	53.39	949	15.97	944.3	10.43	878.2	16.1	944.3	10.43	164.09	311.21
X8077	0.07345	0.0031	1.56703	0.06441	0.15476	0.00231	0.04494	0.00128	1026.4	83.19	957.3	25.48	927.6	12.91	888.6	24.7	927.6	12.91	77.84	134.17
X8078	0.07253	0.00288	1.53971	0.05945	0.15398	0.00222	0.04619	0.00088	1001	78.58	946.4	23.77	923.2	12.4	912.7	17.02	923.2	12.4	161.67	134.84
X8079	0.09952	0.00218	3.90845	0.08324	0.28488	0.00336	0.08324	0.00131	1615.1	40.28	1615.4	17.22	1615.9	16.86	1616.2	24.43	1615.1	40.28	170.16	228.17
X8080	0.07544	0.00175	1.914	0.04326	0.18402	0.00211	0.05605	0.00099	1080.4	45.86	1086	15.08	1088.9	11.48	1102.4	19.01	1080.4	45.86	147.2	299.91
X8081	0.06947	0.00213	1.47883	0.04421	0.15442	0.00193	0.04477	0.00102	912.6	61.88	921.8	18.11	925.7	10.75	885.1	19.74	925.7	10.75	87.39	205.69
X8082	0.06999	0.00183	1.49582	0.03808	0.15501	0.00183	0.0459	0.00097	928.2	52.75	928.7	15.49	929	10.2	907.1	18.65	929	10.2	94.62	265.3
X8083	0.06926	0.00246	1.45935	0.05051	0.15285	0.00205	0.04568	0.00102	906.4	71.53	913.7	20.85	916.9	11.44	902.9	19.78	916.9	11.44	102.95	161.71
X8084	0.07176	0.00157	1.55395	0.03319	0.15709	0.00176	0.04691	0.00127	979	44.04	952.1	13.2	940.6	9.78	926.7	24.5	940.6	9.78	66.43	493.07
X8085	0.11016	0.00239	4.93939	0.10392	0.32523	0.00389	0.0899	0.00147	1802.1	38.93	1809	17.77	1815.2	18.94	1740	27.19	1802.1	38.93	119.45	154.85
X8086	0.05843	0.00266	0.55743	0.02476	0.0692	0.00099	0.02208	0.00062	545.7	96.43	449.9	16.14	431.4	5.97	441.5	12.33	431.4	5.97	133.7	290.56
X8087	0.09256	0.0067	3.32077	0.23328	0.26024	0.00642	0.07326	0.00233	1478.7	131.44	1485.9	54.82	1491.1	32.85	1429.1	43.8	1478.7	131.44	53.3	32.14
X8088	0.06902	0.00253	1.42397	0.05097	0.14964	0.00202	0.04071	0.0011	899.4	73.96	899	21.35	898.9	11.33	806.6	21.44	898.9	11.33	67.72	143.33
X8089	0.05587	0.003	0.31929	0.01673	0.04145	0.00064	0.01263	0.00036	447	115.36	281.4	12.87	261.8	3.97	253.6	7.26	261.8	3.97	174.42	258.53
X8090	0.18395	0.00386	13.0511	0.26476	0.51461	0.00677	0.13504	0.00256	2688.8	34.24	2683.4	19.13	2676.3	28.83	2560.2	45.63	2688.8	34.24	49.14	61.28
X8091	0.06944	0.00163	1.47887	0.03374	0.15447	0.00175	0.04736	0.00106	911.9	47.45	921.8	13.82	926	9.77	935.3	20.42	926	9.77	89.55	374.31
X8092	0.07027	0.00201	1.33594	0.03727	0.1379	0.00168	0.04299	0.00105	936.1	57.71	861.5	16.2	832.8	9.53	850.8	20.31	832.8	9.53	189.11	615.19
X8093	0.05584	0.00201	0.59475	0.02092	0.07725	0.00098	0.02235	0.00049	445.8	78.18	473.9	13.32	479.7	5.87	446.8	9.75	479.7	5.87	194.11	346.2
X8094	0.07803	0.00318	2.09965	0.08313	0.19516	0.00292	0.05915	0.00155	1147.7	78.82	1148.7	27.23	1149.3	15.77	1161.5	29.59	1147.7	78.82	85.97	137.64
X8095	0.08697	0.00209	2.81948	0.06577	0.23513	0.0028	0.06889	0.00136	1359.9	45.52	1360.7	17.48	1361.3	14.6	1346.6	25.71	1359.9	45.52	116.53	256.47
X8096	0.06837	0.0023	1.30871	0.04292	0.13885	0.00181	0.04469	0.00124	879.6	68.2	849.6	18.88	838.1	10.25	883.7	24.04	838.1	10.25	144.16	466.44
X8097	0.05258	0.00366	0.32178	0.02191	0.04439	0.00078	0.01501	0.00041	310.5	150.25	283.3	16.83	280	4.84	301.2	8.11	280	4.84	196.64	198.22
X8098	0.07045	0.00259	1.5145	0.05425	0.15593	0.00212	0.04496	0.00105	941.4	73.58	936.3	21.9	934.1	11.84	889	20.24	934.1	11.84	82.85	123.69
X8099	0.07156	0.00219	1.53101	0.04555	0.15518	0.00194	0.04461	0.00111	973.4	61.09	942.9	18.28	929.9	10.83	882.2	21.43	929.9	10.83	70.68	194.69
X8100	0.05237	0.00384	0.29201	0.02093	0.04044	0.00076	0.01343	0.00041	301.6	158.3	260.1	16.45	255.6	4.69	269.6	8.09	255.6	4.69	228.52	251.64
X8101	0.05982	0.00383	0.75491	0.04716	0.09153	0.00168	0.03523	0.00216	597	133.07	571.1	27.29	564.6	9.9	699.8	42.25	564.6	9.9	52.24	295.58
X8102	0.06877	0.00224	1.43208	0.04544	0.15103	0.00194	0.04383	0.0011	891.9	65.86	902.4	18.97	906.7	10.84	867	21.34	906.7	10.84	110.03	276.15
X8103	0.09763	0.00269	3.70866	0.09921	0.2755	0.00358	0.08464	0.00129	1579.4	50.74	1573.2	21.39	1568.6	18.08	1642.2	24.12	1579.4	50.74	306.76	214.78
X8104	0.07013	0.00191	1.46663	0.03879	0.15167	0.00181	0.04474	0.00093	932.3	55.04	916.7	15.97	910.3	10.14	884.7	18.07	910.3	10.14	138.92	317.92
X8105	0.07116	0.00187	1.56446	0.03993	0.15946	0.00188	0.04905	0.00093	961.9	52.64	956.2	15.81	953.8	10.46	967.8	17.84	953.8	10.46	127.98	262.68
X8106	0.11868	0.00165	5.77737	0.07806	0.35307	0.00367	0.12445	0.00194	1936.4	24.65	1943	11.7	1949.2	17.5	2370.8	34.87	1936.4	24.65	156.95	792.43
X8108	0.04984	0.00388	0.23947	0.01833	0.03485	0.0006	0.01045	0.00025	187.4	171.57	218	15.01	220.8	3.76	210.2	4.98	220.8	3.76	339	234.5
X8109	0.05618	0.00146	0.55143	0.01401	0.07118	0.0008	0.02197	0.00037	458.9	57.15	445.9	9.17	443.3	4.83	439.3	7.37	443.3	4.83	378.21	738.57
X8110	0.05568	0.00185	0.53895	0.01745	0.07019	0.00086	0.02304	0.00051	439.5	72.1	437.7	11.52	437.3	5.17	460.5	10.11	437.3	5.17	174.07	425.85
X8111	0.06986	0.00454	1.47389	0.09323	0.15301	0.00303	0.05192	0.0014	924.3	128.1	919.7	38.27	917.8	16.93	1023.1	26.94	917.8	16.93	57.83	45.94
X8112	0.11341	0.00185	5.25015	0.08318	0.33574	0.00364	0.10669	0.00204	1854.7	29.21	1860.8	13.51	1866.2	17.54	2049	37.3	1854.7	29.21	79.5	376.37
X8113	0.05716	0.00208	0.56484	0.0201	0.07166	0.00092	0.02368	0.00045	497.3	78.93	454.7	13.04	446.2	5.51	473	8.95	446.2	5.51	293.89	388.19
X8114	0.16327	0.00232	10.5557	0.14576	0.46888	0.00503	0.13897	0.00196	2489.8	23.77	2484.8	12.81	2478.6	22.09	2630.1	34.81	2489.8	23.77	147.36	293.22
X8116	0.0552	0.00231	0.52106	0.02129	0.06846	0.00092	0.02464	0.00054	420.1	90.53	425.9	14.21	426.9	5.55	491.9	10.64	426.9	5.55	153.97	254.91
X8117	0.06952	0.0019	1.47558	0.03935	0.15394	0.00184	0.05083	0.00097	914.1	55.38	920.4	16.14	923	10.27	1002.1	18.65	923	10.27	117.8	236.11
X8118	0.0683	0.00149	1.45257	0.03086	0.15424	0.0017	0.04909	0.00083	877.6	44.5	910.9	12.78	924.7	9.52	968.6	16.06	924.7	9.52	151.06	372.2
X8119	0.05476	0.00173	0.51812	0.01595	0.06862	0.00082	0.02155	0.00067	402.4	68.35	423.9	10.67	427.8	4.94	430.9	13.32	427.8	4.94	77.35	462.91
X8120	0.05696	0.00496	0.52299	0.04454	0.06658	0.00141	0.02269	0.00093	489.4	181.82	427.1	29.7	415.5	8.54	453.6	18.31	415.5	8.54	59.66	76.43
X8121	0.06954	0.00181	1.48383	0.03767	0.15473	0.00181	0.04763	0.00088	914.9	52.75	923.8	15.4	927.4	10.12	940.4	16.92	927.4	10.12	137.39	261.06
X8122	0.06904	0.00176	1.4718	0.0366	0.15459	0.00179	0.04674	0.00084	900	51.79	918.9	15.03	926.6	10.02	923.4	16.19	926.6	10.02	129.3	234.55
X8123	0.05356	0.00221	0.39311	0.01587	0.05323	0.0007	0.01823	0.00034	352.3	90.46	336.6	11.57	334.3	4.28	365.2	6.81	334.3	4.28	303.98	343.35
X8124	0.05597	0.00156	0.48806	0.01331	0.06324	0.00073	0.01967	0.00039	450.7	60.89	403.6	9.08	395.3	4.42	393.7	7.79	395.3	4.42	402.14	997.52
X8125	0.07107	0.00256	1.52622	0.05348	0.15573	0.0021	0.05254	0.00115	959.4	71.87	941	21.49	933	11.71	1035	22.17	933	11.71	76.96	122.29
X8126	0.06597	0.00377	1.19087	0.06636	0.1309	0.00224	0.03638	0.0012	805.5	115.2	796.4	30.76	793	12.75	722.2	23.41	793	12.75	41.92	57.96
X8127	0.07428	0.00159	1.59096	0.03301	0.15531	0.00172	0.05159	0.00074	1049.2	42.43	966.7	12.94	930.6	9.59	1016.8	14.19	930.6	9.59	289.11	395.53
X8128	0.06947	0.00158	1.47754	0.03272	0.15423	0.00173	0.04837	0.00089	912.7	46.13	921.2	13.41	924.7	9.65	954.8	17.13	924.7	9.65	130.3	329.16
X8129	0.05682	0.00301	0.56814	0.02944	0.07251	0.00112	0.02288	0.00084	483.8	113.7	456.8	19.06	451.3	6.72	457.3	16.52	451.3	6.72	78.49	186.69
X8130	0.04982	0.00386	0.24424	0.01857	0.03555	0.00066	0.0121	0.00032	186.6	171.12	221.9	15.16	225.2	4.09	243.1	6.38	225.2	4.09	222.74	163.19
X8131	0.06868	0.00136	1.42955	0.02759	0.15093	0.00162	0.03744	0.00089	889.2	40.42	901.4	11.53	906.2	9.1	742.8	17.37	906.2	9.1	85.26	482.97
X8132	0.07	0.00208	1.46947	0.04244	0.15223	0.00188	0.04755	0.00088	928.3	59.59	917.9	17.45	913.4	10.49	939	17	913.4	10.49	120.48	165.44
X8133	0.10157	0.00218	4.14595	0.08639	0.296	0.00347	0.0937	0.00201	1652.9	39.32	1663.4	17.05	1671.4	17.24	1810.3	37.12	1652.9	39.32	130.42	389.88
X8134	0.0675	0.00192	1.32396	0.03669	0.14224	0.00171	0.0486	0.00075	853.1	58.06	856.2	16.03	857.3	9.66	959.2	14.42	857.3	9.66	527.22	503.74
X8135	0.05623	0.00259	0.56075	0.02521	0.07231	0.00103	0.02131	0.00056	460.7	99.7	452	16.4	450.1	6.18	426.2	11.16	450.1	6.18	135.58	209.8
X8136	0.06845	0.00277	1.42678	0.05632	0.15114	0.00215	0.04825	0.00122	882.3	81.66	900.2	23.57	907.3	12.06	952.4	23.44	907.3	12.06	57.53	94.45
X8137	0.05728	0.00152	0.63024	0.01636	0.07979	0.00091	0.02688	0.00038	501.6	58.04	496.2	10.19	494.9	5.42	536.1	7.56	494.9	5.42	541.14	526.7
X8138	0.07314	0.00203	1.56119	0.04206	0.15477	0.00187	0.05245	0.00103	1018	55.15	954.9	16.68	927.6	10.43	1033.2	19.76	927.6	10.43	121.47	228.11
X8139	0.06928	0.00155	1.4489	0.0316	0.15164	0.00169	0.04785	0.00092	907.1	45.51	909.4	13.1	910.2	9.45	944.7	17.71	910.2	9.45	208.25	596.47
X8140	0.1652	0.00355	10.8155	0.2246	0.4747	0.00616	0.12357	0.00207	2509.6	35.71	2507.4	19.3	2504.1	26.92	2354.9	37.2	2509.6	35.71	90.73	70.18
X8141	0.05622	0.00198	0.52448	0.01804	0.06764	0.00085	0.02415	0.00058	460.3	76.51	428.1	12.02	421.9	5.12	482.4	11.41	421.9	5.12	140.77	371.26
X8142	0.05338	0.00326	0.27394	0.01634	0.03721	0.00061	0.01275	0.00031	344.7	131.85	245.8	13.03	235.5	3.79	256	6.27	235.5	3.79	291.82	275.6
X8143	0.06915	0.00194	1.48362	0.04051	0.15556	0.00187	0.04986	0.00106	903.3	56.8	923.7	16.56	932.1	10.43	983.4	20.46	932.1	10.43	82.64	193
X8144	0.07074	0.00203	1.48126	0.04129	0.15182	0.00184	0.04951	0.0011	950	57.56	922.7	16.9	911.2	10.31	976.8	21.25	911.2	10.31	89.08	217.6
X8145	0.09347	0.00155	3.34025	0.05369	0.25912	0.00275	0.0809	0.00096	1497.3	31.01	1490.5	12.56	1485.3	14.06	1572.5	17.88	1497.3	31.01	509.12	345.94
X8146	0.06901	0.00144	1.45323	0.02955	0.15268	0.00166	0.05007	0.00068	899.1	42.53	911.2	12.23	915.9	9.3	987.4	13.11	915.9	9.3	375.87	423.43
X8147	0.07142	0.00182	1.58554	0.03935	0.16097	0.00188	0.05756	0.00128	969.4	51.23	964.5	15.45	962.2	10.42	1131.2	24.4	962.2	10.42	110.5	376.67
X8148	0.07128	0.00209	1.54625	0.04412	0.15728	0.00193	0.05257	0.00101	965.4	58.78	949	17.59	941.7	10.77	1035.6	19.47	941.7	10.77	149.35	240.04
X8149	0.0694	0.00157	1.44235	0.03179	0.15069	0.00168	0.05001	0.00086	910.5	45.97	906.7	13.22	904.9	9.42	986.3	16.46	904.9	9.42	172.04	362.96
X8150	0.06938	0.0019	1.3374	0.03568	0.13976	0.00166	0.04472	0.00087	910.1	55.5	862.1	15.5	843.3	9.4	884.3	16.76	843.3	9.4	221.19	409.82
